# Supplementary material
Source: MDPI journal article supplement (https://www.mdpi.com/2073-4344/9/1/105)
Supplement: s1 [file s1]

## Supporting Information

# Direct Sulfoxidation of Aromatic Methyl Thioethers with Aryl Halides by Copper-Catalyzed C(sp<sup>3</sup>)-H Bond Activation

Runsheng Xu,\* Yueer Zhu, Feixiang Xiong and Suli Tong

Department of Biology and Environment, Jiyang College of Zhejiang A & F University, Shaoxing, Zhejiang 311800, People's Republic of China

E-mail: [20140041@zafu.edu.cn](mailto:20140041@zafu.edu.cn)

## Contents

|                                         |     |
|-----------------------------------------|-----|
| Contents.....                           | S1  |
| Experimental Details.....               | S2  |
| Analytical Data.....                    | S3  |
| Analytical Data of Compounds 3a-3n..... | S3  |
| Analytical Data of Compounds 5a-5f..... | S16 |
| Spectrums of Compounds 3a-3n.....       | S23 |

## Spectrums of Compounds 5a-5f..... S44

### Experimental Details

#### General Information

All reagents used in experiment were obtained from commercial sources and used without further purification. Solvents for chromatography were technical grade and distilled prior for using. Solvent mixtures were understood as volume/volume. Chemical yields refer to pure isolated substances. Catalysts were purchased from Alfa Aesar (Analytical reagent). Thin layer chromatography (TLC) employed glass 0.25 mm silica gel plates with F-254 indicator, visualized by irradiation with UV light.

The NMR spectra were recorded on Bruker AVANCE III-400 spectrometry at 400 MHz and 100 MHz for  $^1\text{H}$  and  $^{13}\text{C}$  NMR in  $\text{CDCl}_3$ , respectively. The NMR chemical shift was reported in ppm relative to 7.26 and 77 ppm of  $\text{CDCl}_3$  as the standards of  $^1\text{H}$  and  $^{13}\text{C}$  NMR, respectively. The NMR spectra were reported in delta ( $\delta$ ) units, parts per million (ppm) downfield from the internal standard and coupling constants were reported in Hertz (Hz). Multiplicities were indicated s (singlet), d (doublet), t (triplet), q (quartet), m (multiplet). The mass spectra were performed on a Bruker Esquire 3000plus mass spectrometer equipped with ESI interface and ion trap analyzer. The ESI-HRMS were tested on Bruker 7-tesla FT-ICR MS equipped with an electrospray source.

#### Synthesis of trideuteromethylsulfanylbenzene

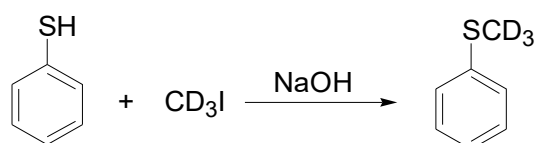

To a solution of Benzenethiol (1.10 g, 10 mmol) was added NaOH (600 mg, 15 mmol) and dry THF (10 mL). The resulting mixture was cooled to 0 °C,  $\text{CD}_3\text{I}$  (1.45 g, 10 mmol, diethyl ether, 99 atom% D) was slowly added. The resulting mixture was

stirred overnight at room temperature. Saturated  $\text{NH}_4\text{Cl}$  was added, and the resulting solution was extracted with  $\text{Et}_2\text{O}$  for three times, combined the organic layers, dried over  $\text{Na}_2\text{SO}_4$ , distillation to give colorless oil (0.851 g, 67%).  $^1\text{H}$  NMR (400 MHz,  $\text{CDCl}_3$ )  $\delta$  7.33–7.21 (m, 3 H), 7.19–7.04 (m, 2 H).  $^{13}\text{C}$  NMR (100 MHz,  $\text{CDCl}_3$ )  $\delta$  137.8, 129.1, 128.3, 125.3, 21.4. ESI-HRMS  $m/z$ : Calcd for  $\text{C}_7\text{H}_5\text{SD}_2^-$  [M-D] $^-$  127.0532, found 127.0534.

### The Two Controlled Experiments

The two controlled experiments as the referee requested. The results showed both the two reaction proceeded smoothly.

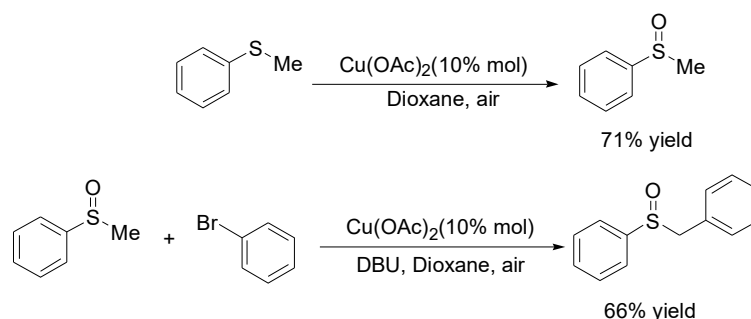

### Analytical Datas

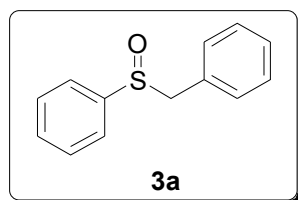

### Benzylsulfanylbenzene (3a):

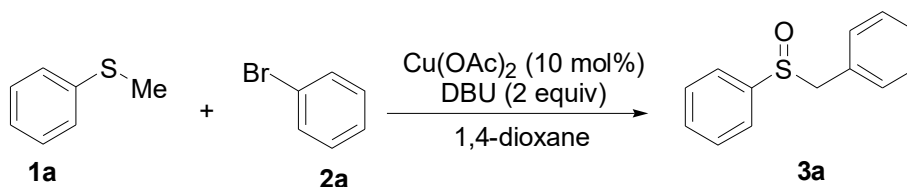

A solution of methylsulfanylbenzene **1a** (0.5 mmol, 62.1 mg), bromobenzene **2a** (0.6 mmol, 94.2 mg),  $\text{Cu(OAc)}_2$  (10 mol%, 9.1 mg), and DBU (2 equiv, 152.2 mg) in 1,4-dioxane (3 mL) was stirred under air. After stirred at 110 °C for 10 h, it was cooled to room temperature. Then the reaction mixture was quenched with saturated salt water (10 mL). After that, the solution was extracted with ethyl acetate ( $3 \times 10$  mL), and then washed with saturated  $\text{Na}_2\text{CO}_3$  solution. The organic layers were combined

and dried by  $\text{Na}_2\text{SO}_4$  and concentrated in vacuo. The pure product benzylsulfinylbenzene **3a** (94.1 mg, 87% yield) was afforded by flash column chromatography on silica gel (cyclohexane/ethyl acetate = 5:1).

$^1\text{H}$  NMR (400 MHz,  $\text{CDCl}_3$ )  $\delta$  7.51–7.37 (m, 5 H), 7.34–7.23 (m, 3 H), 7.05–6.94 (m, 2 H), 4.11 (d,  $J$  = 12.6 Hz, 1 H), 4.02 ppm (d,  $J$  = 12.6 Hz, 1 H);

$^{13}\text{C}$  NMR (100 MHz,  $\text{CDCl}_3$ )  $\delta$  142.9, 131.3, 130.5, 129.2, 128.9, 128.5, 128.3, 124.5, 63.7;

ESI-HRMS  $m/z$ : Calcd for  $\text{C}_{13}\text{H}_{12}\text{NaOS}^+$   $[\text{M}+\text{Na}]^+$  239.0507, found 239.0508.

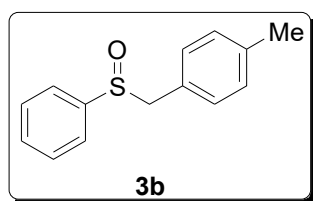

### 1-Benzenesulfinylmethyl-4-methylbenzene (**3b**):

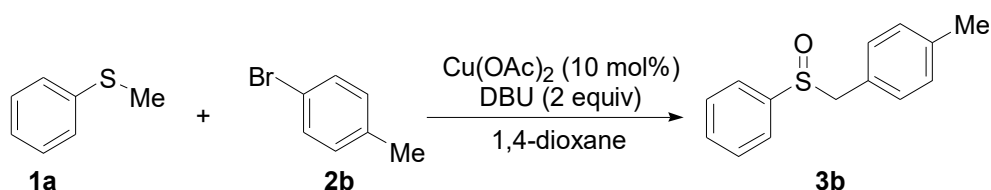

A solution of methylsulfanylbenezene **1a** (0.5 mmol, 62.1 mg), 1-bromo-4-methylbenzene **2b** (0.6 mmol, 102.6 mg),  $\text{Cu}(\text{OAc})_2$  (10 mol%, 9.1 mg), and DBU (2 equiv, 152.2 mg) in 1,4-dioxane (3 mL) was stirred under air. After stirred at 110 °C for 10 h, it was cooled to room temperature. Then the reaction mixture was quenched with saturated salt water (10 mL). After that, the solution was extracted with ethyl acetate ( $3 \times 10$  mL), and then washed with saturated  $\text{Na}_2\text{CO}_3$  solution. The organic layers were combined and dried by  $\text{Na}_2\text{SO}_4$  and concentrated in vacuo. The pure product 1-benzenesulfinylmethyl-4-methylbenzene **3b** (95.6 mg, 83% yield) was afforded by flash column chromatography on silica gel (cyclohexane/ethyl acetate = 5:1).

$^1\text{H}$  NMR (400 MHz,  $\text{CDCl}_3$ )  $\delta$  7.50–7.34 (m, 5 H), 7.06 (d,  $J$  = 7.9 Hz, 2 H), 6.87 (d,  $J$  = 7.9 Hz, 2 H), 4.08 (d,  $J$  = 12.6 Hz, 1 H), 3.97 (d,  $J$  = 12.6 Hz, 1 H), 2.32 (s, H);

$^{13}\text{C}$  NMR (100 MHz,  $\text{CDCl}_3$ )  $\delta$  142.9, 138.3, 131.3, 130.4, 129.3, 128.9, 126.1, 124.6, 63.5, 21.3;

ESI-HRMS  $m/z$ : Calcd for  $C_{14}H_{14}NaOS^+$   $[M+Na]^+$  253.0663, found 253.0661.

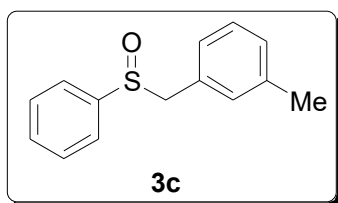

### 1-Benzenesulfinylmethyl-3-methylbenzene (3c):

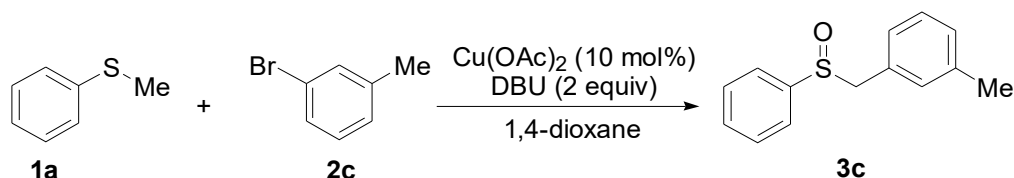

A solution of methylsulfanylbenezene **1a** (0.5 mmol, 62.1 mg), 1-bromo-3-methylbenzene **2c** (0.6 mmol, 102.6 mg),  $Cu(OAc)_2$  (10 mol%, 9.1 mg), and DBU (2 equiv, 152.2 mg) in 1,4-dioxane (3 mL) was stirred under air. After stirred at 110 °C for 10 h, it was cooled to room temperature. Then the reaction mixture was quenched with saturated salt water (10 mL). After that, the solution was extracted with ethyl acetate ( $3 \times 10$  mL), and then washed with saturated  $Na_2CO_3$  solution. The organic layers were combined and dried by  $Na_2SO_4$  and concentrated in vacuo. The pure product 1-benzenesulfinylmethyl-3-methylbenzene **3c** (96.7 mg, 84% yield) was afforded by flash column chromatography on silica gel (cyclohexane/ethyl acetate = 5:1).

$^1H$  NMR (400 MHz,  $CDCl_3$ )  $\delta$  7.52–7.33 (m, 5 H), 7.17–7.03 (m, 2 H), 6.79 (m, 2 H), 4.07 (d,  $J = 12.5$  Hz, 1 H), 3.93 (d,  $J = 12.5$  Hz, 1 H), 2.26 (s, 3 H);

$^{13}C$  NMR (100 MHz,  $CDCl_3$ )  $\delta$  143.1, 138.3, 131.2, 131.2, 129.2, 129.1, 128.9, 128.5, 127.4, 124.6, 63.9, 21.4;

ESI-HRMS  $m/z$ : Calcd for  $C_{14}H_{14}NaOS^+$   $[M+Na]^+$  253.0663, found 253.0661.

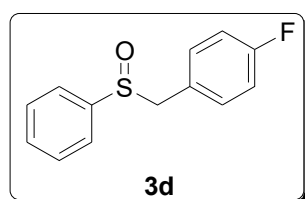

### 1-Benzenesulfinylmethyl-4-fluorobenzene (3d):

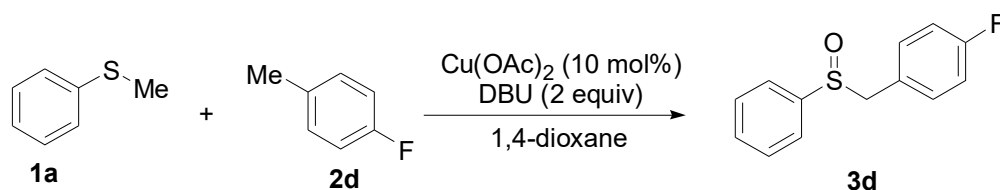

A solution of methylsulfanylbenzene **1a** (0.5 mmol, 62.1 mg), 1-bromo-4-fluorobenzene **2d** (0.6 mmol, 105.0 mg), Cu(OAc)<sub>2</sub> (10 mol%, 9.1 mg), and DBU (2 equiv, 152.2 mg) in 1,4-dioxane (3 mL) was stirred under air. After stirred at 110 °C for 10 h, it was cooled to room temperature. Then the reaction mixture was quenched with saturated salt water (10 mL). After that, the solution was extracted with ethyl acetate (3 × 10 mL), and then washed with saturated Na<sub>2</sub>CO<sub>3</sub> solution. The organic layers were combined and dried by Na<sub>2</sub>SO<sub>4</sub> and concentrated in vacuo. The pure product 1-benzenesulfinylmethyl-4-fluorobenzene **3d** (108.9 mg, 93% yield) was afforded by flash column chromatography on silica gel (cyclohexane/ethyl acetate = 5:1).

<sup>1</sup>H NMR (400 MHz, CDCl<sub>3</sub>) δ 7.50–7.39 (m, 3 H), 7.35 (m, 2 H), 6.92 (d, *J* = 7.0 Hz, 4 H), 4.01 (d, *J* = 12.9 Hz, 1 H), 3.98 (d, *J* = 12.9 Hz, 1 H);

<sup>13</sup>C NMR (100 MHz, CDCl<sub>3</sub>) δ 162.9 (d, *J* = 247.5 Hz), 142.5, 132.1 (d, *J* = 8.3 Hz), 131.4, 129.0, 124.9 (d, *J* = 3.3 Hz), 124.5, 115.5 (d, *J* = 21.6 Hz), 62.4;

ESI-HRMS *m/z*: Calcd for C<sub>13</sub>H<sub>11</sub>FN<sub>2</sub>O<sup>+</sup> [M+Na]<sup>+</sup> 257.0412, found 257.0410.

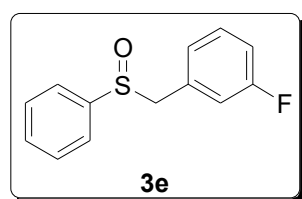

### 1-Benzenesulfinylmethyl-3-fluorobenzene (3e):

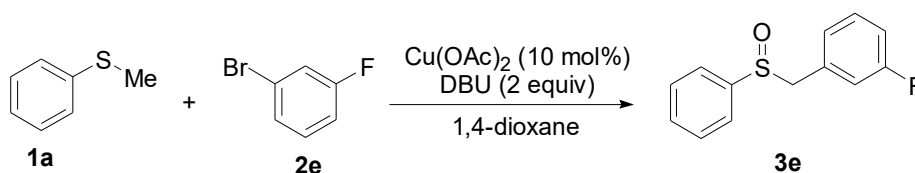

A solution of methylsulfanylbenzene **1a** (0.5 mmol, 62.1 mg), 1-bromo-3-fluorobenzene **2e** (0.6 mmol, 105.0 mg), Cu(OAc)<sub>2</sub> (10 mol%, 9.1 mg), and DBU (2 equiv, 152.2 mg) in 1,4-dioxane (3 mL) was stirred under air. After stirred at 110 °C for 10 h, it was cooled to room temperature. Then the reaction mixture was quenched

with saturated salt water (10 mL). After that, the solution was extracted with ethyl acetate ( $3 \times 10$  mL), and then washed with saturated  $\text{Na}_2\text{CO}_3$  solution. The organic layers were combined and dried by  $\text{Na}_2\text{SO}_4$  and concentrated in vacuo. The pure product 1-benzenesulfinylmethyl-3-fluorobenzene **3e** (103.1 mg, 88% yield) was afforded by flash column chromatography on silica gel (cyclohexane/ethyl acetate = 5:1).

$^1\text{H}$  NMR (400 MHz,  $\text{CDCl}_3$ )  $\delta$  7.52–7.36 (m, 5 H), 7.21 (m, 1 H), 6.98 (td,  $J = 7.9, 2.2$  Hz, 1 H), 6.78 (d,  $J = 7.9$  Hz, 1 H), 6.68 (m, 1 H), 4.03–3.99 (q,  $J = 12.5$  Hz, 2 H);

$^{13}\text{C}$  NMR (100 MHz,  $\text{CDCl}_3$ )  $\delta$  162.6 (d,  $J = 246.9$  Hz), 142.6, 131.5 (d,  $J = 7.9$  Hz), 131.5, 130.0 (d,  $J = 8.3$  Hz), 129.1, 126.2 (d,  $J = 3.0$  Hz), 124.4, 117.3 (d,  $J = 21.9$  Hz), 115.3 (d,  $J = 21.0$  Hz), 63.0;

ESI-HRMS  $m/z$ : Calcd for  $\text{C}_{13}\text{H}_{11}\text{FNaOS}^+$   $[\text{M}+\text{Na}]^+$  257.0412, found 257.0410.

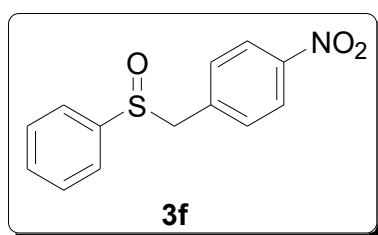

### 1-Benzenesulfinylmethyl-4-nitrobenzene (**3f**):

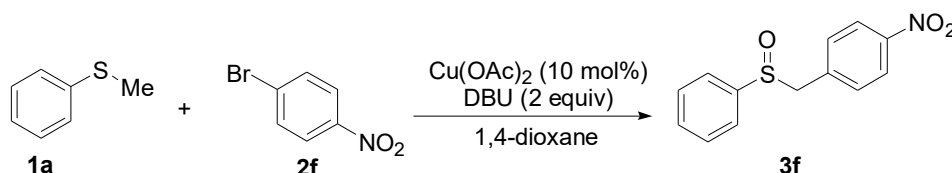

A solution of methylsulfanylbenezene **1a** (0.5 mmol, 62.1 mg), 1-bromo-4-nitrobenzene **2f** (0.6 mmol, 121.2 mg),  $\text{Cu}(\text{OAc})_2$  (10 mol%, 9.1 mg), and DBU (2 equiv, 152.2 mg) in 1,4-dioxane (3 mL) was stirred under air. After stirred at  $110^\circ\text{C}$  for 10 h, it was cooled to room temperature. Then the reaction mixture was quenched with saturated salt water (10 mL). After that, the solution was extracted with ethyl acetate ( $3 \times 10$  mL), and then washed with saturated  $\text{Na}_2\text{CO}_3$  solution. The organic layers were combined and dried by  $\text{Na}_2\text{SO}_4$  and concentrated in vacuo. The pure product 1-benzenesulfinylmethyl-4-nitrobenzene **3f** (117.6 mg, 90% yield) was

afforded by flash column chromatography on silica gel (cyclohexane/ethyl acetate = 5:1).

$^1\text{H}$  NMR (500 MHz,  $\text{CDCl}_3$ )  $\delta$  7.50–7.40 (m, 3 H), 7.39–7.34 (m, 2 H), 7.23–7.18 (m, 2 H), 6.88 (d,  $J$  = 8.4 Hz, 2 H), 4.01 (d,  $J$  = 12.8 Hz, 1 H), 3.96 (d,  $J$  = 12.8 Hz, 1 H);

$^{13}\text{C}$  NMR (126 MHz,  $\text{CDCl}_3$ )  $\delta$  142.6, 134.5, 131.7, 131.4, 129.0, 128.7, 127.6, 124.4, 62.5;

ESI-HRMS  $m/z$ : Calcd for  $\text{C}_{13}\text{H}_{11}\text{NO}_3\text{S}^+$   $[\text{M}+\text{Na}]^+$  284.0357, found 284.0355.

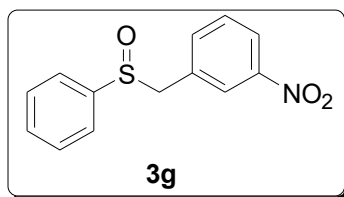

### 1-Benzenesulfinylmethyl-3-nitrobenzene (3g):

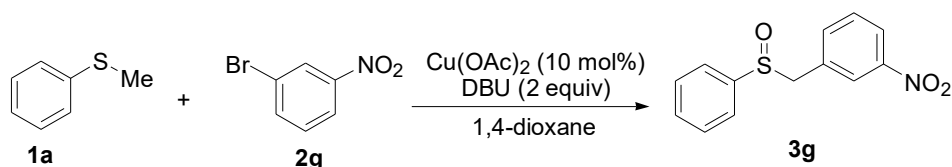

A solution of methylsulfanylbenzene **1a** (0.5 mmol, 62.1 mg), 1-benzenesulfinylmethyl-3-nitrobenzene **2g** (0.6 mmol, 121.2 mg),  $\text{Cu(OAc)}_2$  (10 mol%, 9.1 mg), and DBU (2 equiv, 152.2 mg) in 1,4-dioxane (3 mL) was stirred under air. After stirred at 110 °C for 10 h, it was cooled to room temperature. Then the reaction mixture was quenched with saturated salt water (10 mL). After that, the solution was extracted with ethyl acetate (3 × 10 mL), and then washed with saturated  $\text{Na}_2\text{CO}_3$  solution. The organic layers were combined and dried by  $\text{Na}_2\text{SO}_4$  and concentrated in vacuo. The pure product 1-benzenesulfinylmethyl-3-nitrobenzene **3g** (113.7 mg, 87% yield) was afforded by flash column chromatography on silica gel (cyclohexane/ethyl acetate = 5:1).

$^1\text{H}$  NMR (400 MHz,  $\text{CDCl}_3$ )  $\delta$  7.52–7.42 (m, 3 H), 7.38 (dd,  $J$  = 8.0, 1.4 Hz, 2 H), 7.29 – 7.24 (m, 1 H), 7.18 (t,  $J$  = 8.0 Hz, 1 H), 6.93–6.86 (m, 2 H), 3.98 (s, 2 H);

$^{13}\text{C}$  NMR (100 MHz,  $\text{CDCl}_3$ )  $\delta$  142.5, 134.3, 131.5, 131.1, 130.4, 129.7, 129.0, 128.6, 128.5, 124.4, 62.8;

ESI-HRMS  $m/z$ : Calcd for  $\text{C}_{13}\text{H}_{11}\text{NO}_3\text{S}^+$   $[\text{M}+\text{Na}]^+$  284.0357, found 284.0355.



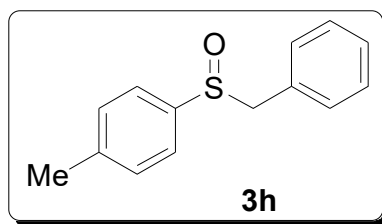

### 1-Methyl-4-phenylmethanesulfinylbenzene (3h):

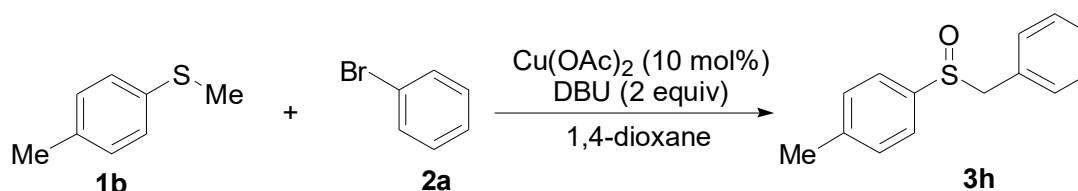

A solution of 1-methyl-4-methylsulfanylbene **1b** (0.5 mmol, 69.1 mg), bromobenzene **2a** (0.6 mmol, 94.2 mg), Cu(OAc)<sub>2</sub> (10 mol%, 9.1 mg), and DBU (2 equiv, 152.2 mg) in 1,4-dioxane (3 mL) was stirred under air. After stirred at 110 °C for 10 h, it was cooled to room temperature. Then the reaction mixture was quenched with saturated salt water (10 mL). After that, the solution was extracted with ethyl acetate (3 × 10 mL), and then washed with saturated Na<sub>2</sub>CO<sub>3</sub> solution. The organic layers were combined and dried by Na<sub>2</sub>SO<sub>4</sub> and concentrated in vacuo. The pure product 1-methyl-4-phenylmethanesulfinylbenzene **3h** (93.3 mg, 81% yield) was afforded by flash column chromatography on silica gel (cyclohexane/ethyl acetate = 5:1).

<sup>1</sup>H NMR (400 MHz, CDCl<sub>3</sub>) δ 7.33–7.21 (m, 7 H), 7.02 (dd, *J* = 12.3, 6.1 Hz, 2 H), 4.10 (d, *J* = 12.5 Hz, 1 H), 3.98 (d, *J* = 12.5 Hz, 1 H), 2.41 (s, 3 H);

<sup>13</sup>C NMR (100 MHz, CDCl<sub>3</sub>) δ 141.7, 139.6, 130.4, 129.6, 129.4, 128.5, 128.2, 124.5, 63.8, 21.5;

ESI-HRMS *m/z*: Calcd for C<sub>14</sub>H<sub>14</sub>NaOS<sup>+</sup> [M+Na]<sup>+</sup> 253.0663, found 253.0661.

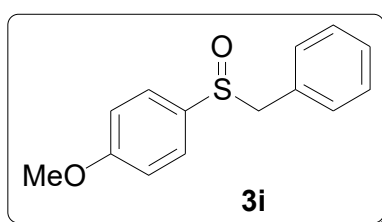

### 1-Methoxy-4-phenylmethanesulfinylbenzene (3i):

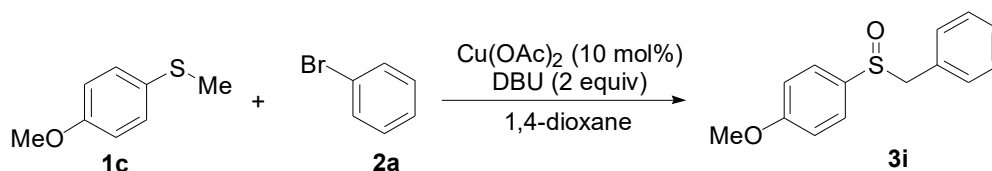

A solution of 1-methoxy-4-methylsulfanylbenzene **1c** (0.5 mmol, 77.1 mg), bromobenzene **2a** (0.6 mmol, 94.2 mg),  $\text{Cu}(\text{OAc})_2$  (10 mol%, 9.1 mg), and DBU (2 equiv, 152.2 mg) in 1,4-dioxane (3 mL) was stirred under air. After stirred at 110 °C for 10 h, it was cooled to room temperature. Then the reaction mixture was quenched with saturated salt water (10 mL). After that, the solution was extracted with ethyl acetate ( $3 \times 10$  mL), and then washed with saturated  $\text{Na}_2\text{CO}_3$  solution. The organic layers were combined and dried by  $\text{Na}_2\text{SO}_4$  and concentrated in vacuo. The pure product 1-methoxy-4-phenylmethanesulfinylbenzene **3i** (104.7 mg, 85% yield) was afforded by flash column chromatography on silica gel (cyclohexane/ethyl acetate = 4:1).

$^1\text{H}$  NMR (400 MHz,  $\text{CDCl}_3$ )  $\delta$  7.50–7.34 (m, 5 H), 7.06 (d,  $J = 7.9$  Hz, 2 H), 6.87 (d,  $J = 7.9$  Hz, 2 H), 4.08 (d,  $J = 12.6$  Hz, 1 H), 3.97 (d,  $J = 12.6$  Hz, 1 H), 2.32 (s, 3 H);

$^{13}\text{C}$  NMR (100 MHz,  $\text{CDCl}_3$ )  $\delta$  142.9, 138.2, 131.2, 130.3, 129.3, 128.9, 26.1, 124.6, 63.5, 21.3;

ESI-HRMS  $m/z$ : Calcd for  $\text{C}_{14}\text{H}_{14}\text{NaO}_2\text{S}^+$   $[\text{M}+\text{Na}]^+$  269.0612, found 269.0611.

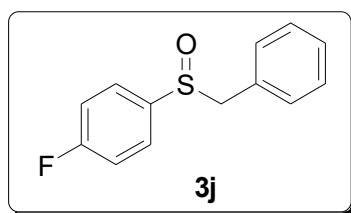

### 1-Fluoro-4-phenylmethanesulfinylbenzene (**3j**):

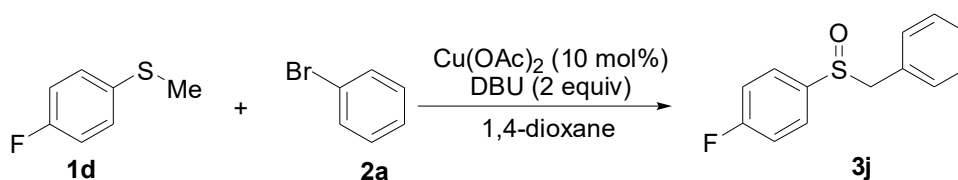

A solution of 1-fluoro-4-methylsulfanylbenzene **1d** (0.5 mmol, 71.1 mg), bromobenzene **2a** (0.6 mmol, 94.2 mg),  $\text{Cu}(\text{OAc})_2$  (10 mol%, 9.1 mg), and DBU (2 equiv, 152.2 mg) in 1,4-dioxane (3 mL) was stirred under air. After stirred at 110 °C for 10 h, it was cooled to room temperature. Then the reaction mixture was quenched

with saturated salt water (10 mL). After that, the solution was extracted with ethyl acetate ( $3 \times 10$  mL), and then washed with saturated  $\text{Na}_2\text{CO}_3$  solution. The organic layers were combined and dried by  $\text{Na}_2\text{SO}_4$  and concentrated in vacuo. The pure product 1-fluoro-4-phenylmethanesulfinyl-3-methylbenzene **3j** (99.3 mg, 80% yield) was afforded by flash column chromatography on silica gel (cyclohexane/ethyl acetate = 5:1).

$^1\text{H}$  NMR (400 MHz,  $\text{CDCl}_3$ )  $\delta$  7.57 (d,  $J$  = 8.5 Hz, 2 H), 7.35–7.25 (m, 3 H), 7.22 (d,  $J$  = 8.5 Hz, 2 H), 7.04–6.94 (m, 2 H), 4.11 (d,  $J$  = 12.6 Hz, 1 H), 4.00 (d,  $J$  = 12.6 Hz, 1 H);

$^{13}\text{C}$  NMR (100 MHz,  $\text{CDCl}_3$ )  $\delta$  141.9, 132.1, 130.4, 128.6, 128.5, 26.15, 25.7, 63.5;

ESI-HRMS  $m/z$ : Calcd for  $\text{C}_{13}\text{H}_{11}\text{FNaOS}^+$   $[\text{M}+\text{Na}]^+$  257.0412, found 257.0410.

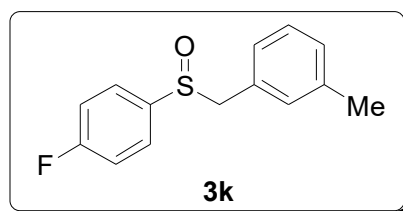

### 1-(3-Methylphenylmethanesulfinyl)-4-fluoromethylbenzene (**3k**):

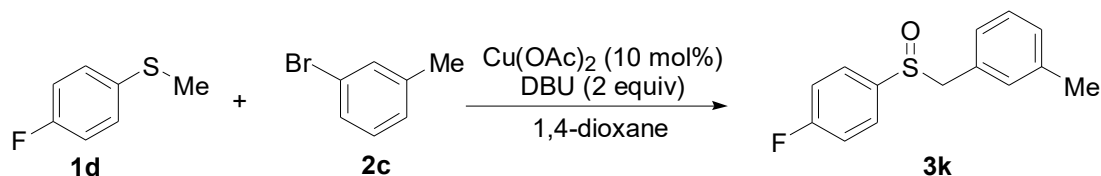

A solution of 1-fluoro-4-methylsulfanylbene **1d** (0.5 mmol, 71.1 mg), 1-bromo-3-methylbenzene **2c** (0.6 mmol, 102.6 mg),  $\text{Cu}(\text{OAc})_2$  (10 mol%, 9.1 mg), and DBU (2 equiv, 152.2 mg) in 1,4-dioxane (3 mL) was stirred under air. After stirred at  $110^\circ\text{C}$  for 10 h, it was cooled to room temperature. Then the reaction mixture was quenched with saturated salt water (10 mL). After that, the solution was extracted with ethyl acetate ( $3 \times 10$  mL), and then washed with saturated  $\text{Na}_2\text{CO}_3$  solution. The organic layers were combined and dried by  $\text{Na}_2\text{SO}_4$  and concentrated in vacuo. The pure product 1-(3-methylphenylmethanesulfinyl)-4-fluoromethylbenzene **3k** (93.1 mg, 75% yield) was afforded by flash column chromatography on silica gel (cyclohexane/ethyl acetate = 5:1).

$^1\text{H}$  NMR (400 MHz,  $\text{CDCl}_3$ )  $\delta$  7.55 (d,  $J$  = 8.5 Hz, 2 H), 7.22 (d,  $J$  = 8.5 Hz, 2 H), 7.13 (m, 2 H), 6.80–6.74 (m, 2 H), 4.07 (d,  $J$  = 12.5 Hz, 1 H), 3.92 (d,  $J$  = 12.5 Hz, 1 H), 2.28 (s, 3 H);

$^{13}\text{C}$  NMR (100 MHz,  $\text{CDCl}_3$ )  $\delta$  142.1, 138.4, 132.0, 131.1, 129.3, 128.6, 128.5, 127.4, 126.1, 125.7, 63.8, 21.3;

ESI-HRMS  $m/z$ : Calcd for  $\text{C}_{14}\text{H}_{13}\text{FNaOS}^+$   $[\text{M}+\text{Na}]^+$  257.0412, found 257.0410.

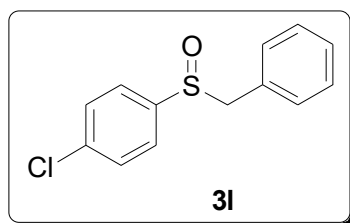

### 1-Chloro-4-phenylmethanesulfinylbenzene (3l):

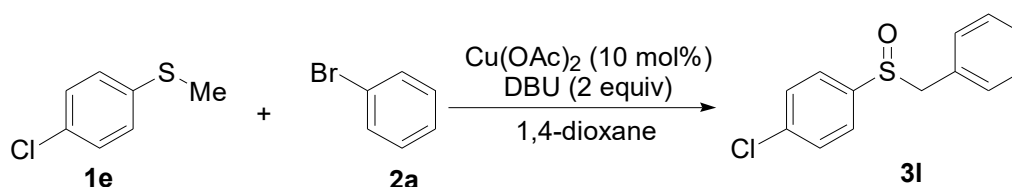

A solution of 1-chloro-4-methylsulfanylbenzene **1e** (0.5 mmol, 79.3 mg), bromobenzene **2a** (0.6 mmol, 94.2 mg),  $\text{Cu}(\text{OAc})_2$  (10 mol%, 9.1 mg), and DBU (2 equiv, 152.2 mg) in 1,4-dioxane (3 mL) was stirred under air. After stirred at 110 °C for 10 h, it was cooled to room temperature. Then the reaction mixture was quenched with saturated salt water (10 mL). After that, the solution was extracted with ethyl acetate ( $3 \times 10$  mL), and then washed with saturated  $\text{Na}_2\text{CO}_3$  solution. The organic layers were combined and dried by  $\text{Na}_2\text{SO}_4$  and concentrated in vacuo. The pure product 1-chloro-4-phenylmethanesulfinylbenzene **3l** (99.0 mg, 79% yield) was afforded by flash column chromatography on silica gel (cyclohexane/ethyl acetate = 5:1).

$^1\text{H}$  NMR (400 MHz,  $\text{CDCl}_3$ )  $\delta$  7.41 (d,  $J$  = 8.5 Hz, 2 H), 7.36–7.21 (m, 5 H), 7.05–6.92 (m, 2 H), 4.12 (d,  $J$  = 12.6 Hz, 1 H), 4.00 (d,  $J$  = 12.6 Hz, 1 H);

$^{13}\text{C}$  NMR (100 MHz,  $\text{CDCl}_3$ )  $\delta$  141.2, 137.4, 130.4, 129.2, 128.7, 128.6, 128.5, 125.9, 63.5;

ESI-HRMS  $m/z$ : Calcd for  $\text{C}_{13}\text{H}_{11}\text{ClNaOS}^+$   $[\text{M}+\text{Na}]^+$  273.0117, found 273.0114.

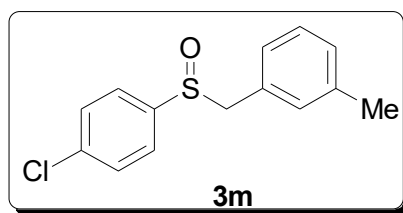

### 1-Chloro-4-phenylmethanesulfinyl-3-methylbenzene (3m):

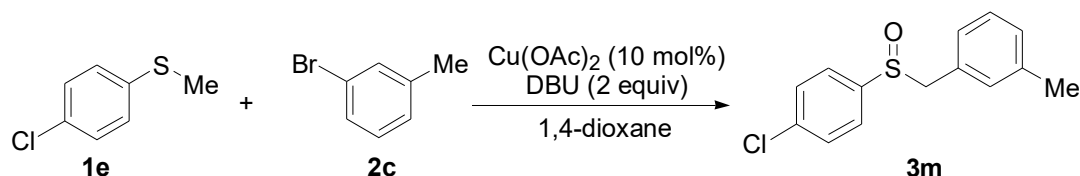

A solution of 1-chloro-4-methylsulfanylbenzene **1e** (0.5 mmol, 79.3 mg), 1-bromo-3-methylbenzene **2c** (0.6 mmol, 102.6 mg), Cu(OAc)<sub>2</sub> (10 mol%, 9.1 mg), and DBU (2 equiv, 152.2 mg) in 1,4-dioxane (3 mL) was stirred under air. After stirred at 110 °C for 10 h, it was cooled to room temperature. Then the reaction mixture was quenched with saturated salt water (10 mL). After that, the solution was extracted with ethyl acetate (3 × 10 mL), and then washed with saturated Na<sub>2</sub>CO<sub>3</sub> solution. The organic layers were combined and dried by Na<sub>2</sub>SO<sub>4</sub> and concentrated in vacuo. The pure product 1-chloro-4-phenylmethanesulfinyl-3-methylbenzene **3m** (98.0 mg, 74% yield) was afforded by flash column chromatography on silica gel (cyclohexane/ethyl acetate = 4:1).

<sup>1</sup>H NMR (400 MHz, CDCl<sub>3</sub>) δ 7.40 (d, *J* = 8.5 Hz, 2 H), 7.29 (d, *J* = 8.5 Hz, 2 H), 7.13 (m, 2 H), 6.80–6.74 (m, 2 H), 4.08 (d, *J* = 12.5 Hz, 1 H), 3.92 (d, *J* = 12.5 Hz, 1 H), 2.28 (s, 3 H);

<sup>13</sup>C NMR (100 MHz, CDCl<sub>3</sub>) δ 141.4, 138.4, 137.4, 131.2, 129.3, 129.1, 128.7, 128.5, 127.5, 126.0, 63.8, 21.3;

ESI-HRMS *m/z*: Calcd for C<sub>14</sub>H<sub>13</sub>ClNaOS<sup>+</sup> [M+Na]<sup>+</sup> 287.0273, found 287.0271.

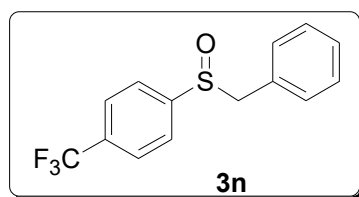

### 1-Phenylmethanesulfinyl-4-(trifluoromethyl)benzene (3n):

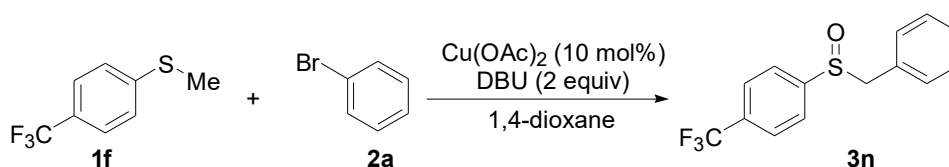

A solution of 1-methylsulfonyl-4-(trifluoromethyl)benzene **1f** (0.5 mmol, 96.1 mg), bromobenzene **2a** (0.6 mmol, 94.2 mg),  $\text{Cu}(\text{OAc})_2$  (10 mol%, 9.1 mg), and DBU (2 equiv, 152.2 mg) in 1,4-dioxane (3 mL) was stirred under air. After stirred at 110 °C for 10 h, it was cooled to room temperature. Then the reaction mixture was quenched with saturated salt water (10 mL). After that, the solution was extracted with ethyl acetate ( $3 \times 10$  mL), and then washed with saturated  $\text{Na}_2\text{CO}_3$  solution. The organic layers were combined and dried by  $\text{Na}_2\text{SO}_4$  and concentrated in vacuo. The pure product 1-phenylmethanesulfinyl-4-(trifluoromethyl)benzene **3n** (102.3 mg, 72% yield) was afforded by flash column chromatography on silica gel (cyclohexane/ethyl acetate = 4:1).

$^1\text{H}$  NMR (400 MHz,  $\text{CDCl}_3$ )  $\delta$  7.69 (d,  $J$  = 8.2 Hz, 2 H), 7.48 (d,  $J$  = 8.2 Hz, 2 H), 7.37–7.23 (m, 3 H), 6.99 (d,  $J$  = 6.9 Hz, 2 H), 4.13 (d,  $J$  = 12.7 Hz, 1 H), 4.05 (d,  $J$  = 12.7 Hz, 1 H);

$^{13}\text{C}$  NMR (100 MHz,  $\text{CDCl}_3$ )  $\delta$  147.2, 133.1 (q,  $J$  = 31.5 Hz), 130.4, 128.7, 128.7, 128.5, 125.8 (q,  $J$  = 3.7 Hz), 125.0, 122.2, 63.4;

ESI-HRMS  $m/z$ : Calcd for  $\text{C}_{14}\text{H}_{11}\text{F}_3\text{NaOS}^+ [\text{M}+\text{Na}]^+$  307.0380, found 307.0381.

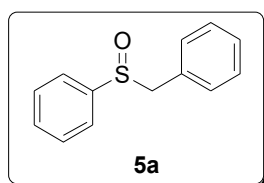

### Benzylsulfinylbenzene (**5a**):

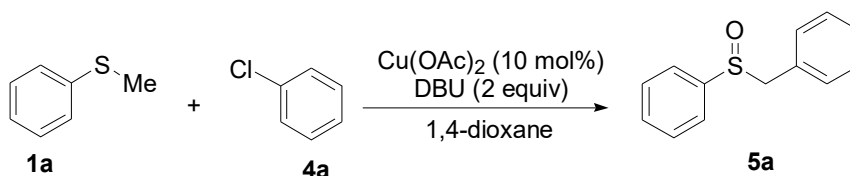

A solution of methylsulfonylbenzene **1a** (0.5 mmol, 62.1 mg), chlorobenzene **4a** (0.6 mmol, 67.6 mg),  $\text{Cu}(\text{OAc})_2$  (10 mol%, 9.1 mg), and DBU (2 equiv, 152.2 mg) in 1,4-dioxane (3 mL) was stirred under air. After stirred at 110 °C for 10 h, it was cooled

to room temperature. Then the reaction mixture was quenched with saturated salt water (10 mL). After that, the solution was extracted with ethyl acetate ( $3 \times 10$  mL), and then washed with saturated  $\text{Na}_2\text{CO}_3$  solution. The organic layers were combined and dried by  $\text{Na}_2\text{SO}_4$  and concentrated in vacuo. The pure product benzylsulfinylbenzene **5a** (85.4 mg, 79% yield) was afforded by flash column chromatography on silica gel (cyclohexane/ethyl acetate = 5:1).

$^1\text{H}$  NMR (400 MHz,  $\text{CDCl}_3$ )  $\delta$  7.51–7.37 (m, 5 H), 7.34–7.23 (m, 3 H), 7.05–6.94 (m, 2 H), 4.11 (d,  $J$  = 12.6 Hz, 1 H), 4.02 ppm (d,  $J$  = 12.6 Hz, 1 H);

$^{13}\text{C}$  NMR (100 MHz,  $\text{CDCl}_3$ )  $\delta$  142.9, 131.3, 130.5, 129.2, 128.9, 128.5, 128.3, 124.5, 63.7;

ESI-HRMS  $m/z$ : Calcd for  $\text{C}_{13}\text{H}_{12}\text{NaOS}^+$   $[\text{M}+\text{Na}]^+$  239.0508, found 239.0507.

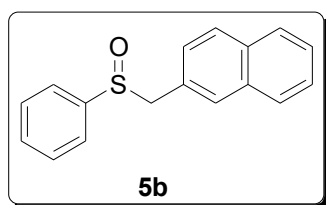

### 2-Benzenesulfinylmethyl-naphthalene (**5b**):

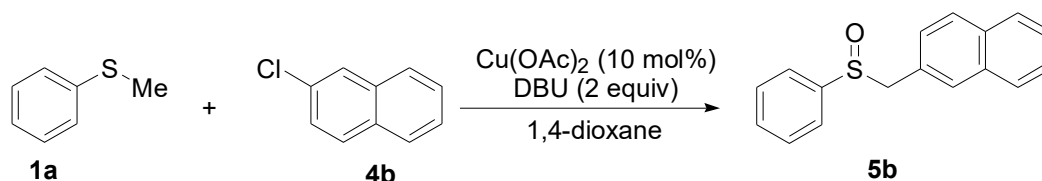

A solution of methylsulfanylbenzene **1a** (0.5 mmol, 62.1 mg), 2-chloro-naphthalene **4b** (0.6 mmol, 97.6 mg),  $\text{Cu}(\text{OAc})_2$  (10 mol%, 9.1 mg), and DBU (2 equiv, 152.2 mg) in 1,4-dioxane (3 mL) was stirred under air. After stirred at 110 °C for 10 h, it was cooled to room temperature. Then the reaction mixture was quenched with saturated salt water (10 mL). After that, the solution was extracted with ethyl acetate ( $3 \times 10$  mL), and then washed with saturated  $\text{Na}_2\text{CO}_3$  solution. The organic layers were combined and dried by  $\text{Na}_2\text{SO}_4$  and concentrated in vacuo. The pure product 2-benzenesulfinylmethyl-naphthalene **5b** (115.9 mg, 87% yield) was afforded by flash column chromatography on silica gel (cyclohexane/ethyl acetate = 3:1).

$^1\text{H}$  NMR (400 MHz,  $\text{CDCl}_3$ )  $\delta$  8.04–7.93 (m, 1 H), 7.90–7.84 (m, 1 H), 7.81 (d,  $J$  = 8.3 Hz, 1 H), 7.56–7.47 (m, 2 H), 7.47–7.34 (m, 5 H), 7.33–7.28 (m, 1 H), 7.02 (d,  $J$  = 7.0 Hz, 1 H), 4.73 (d,  $J$  = 12.6 Hz, 1 H), 4.36 (d,  $J$  = 12.6 Hz, 1 H);

$^{13}\text{C}$  NMR (100 MHz,  $\text{CDCl}_3$ )  $\delta$  143.4, 133.8, 132.0, 131.3, 129.8, 129.3, 128.9, 128.9, 126.7, 126.1, 125.9, 125.3, 124.4, 123.5, 62.4;

ESI-HRMS  $m/z$ : Calcd for  $\text{C}_{17}\text{H}_{14}\text{NaOS}^+$   $[\text{M}+\text{Na}]^+$  289.0663, found 289.0663.

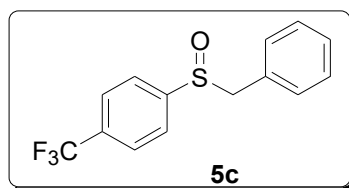

### 1-Phenylmethanesulfinyl-4-trifluoromethylbenzene (5c):

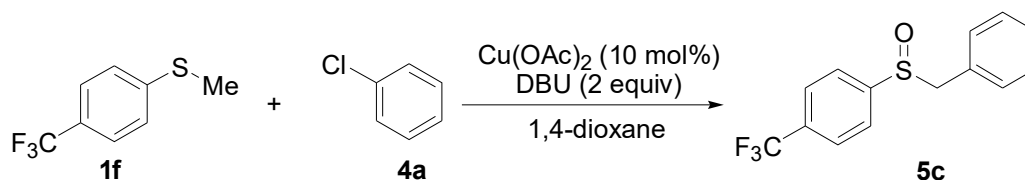

A solution of 1-methylsulfonyl-4-trifluoromethylbenzene **1f** (0.5 mmol, 96.1 mg), chlorobenzene **4a** (0.6 mmol, 67.6 mg),  $\text{Cu}(\text{OAc})_2$  (10 mol%, 9.1 mg), and DBU (2 equiv, 152.2 mg) in 1,4-dioxane (3 mL) was stirred under air. After stirred at 110 °C for 10 h, it was cooled to room temperature. Then the reaction mixture was quenched with saturated salt water (10 mL). After that, the solution was extracted with ethyl acetate ( $3 \times 10$  mL), and then washed with saturated  $\text{Na}_2\text{CO}_3$  solution. The organic layers were combined and dried by  $\text{Na}_2\text{SO}_4$  and concentrated in vacuo. The pure product 1-phenylmethanesulfinyl-4-trifluoromethylbenzene **5c** (89.5 mg, 63% yield) was afforded by flash column chromatography on silica gel (cyclohexane/ethyl acetate = 4:1).

$^1\text{H}$  NMR (400 MHz,  $\text{CDCl}_3$ )  $\delta$  7.69 (d,  $J$  = 8.2 Hz, 2 H), 7.48 (d,  $J$  = 8.2 Hz, 2 H), 7.37–7.23 (m, 3 H), 6.99 (d,  $J$  = 6.9 Hz, 2 H), 4.13 (d,  $J$  = 12.7 Hz, 1 H), 4.05 (d,  $J$  = 12.7 Hz, 1 H);

$^{13}\text{C}$  NMR (100 MHz,  $\text{CDCl}_3$ )  $\delta$  147.2, 133.1 (q,  $J$  = 31.5 Hz), 130.4, 128.7, 128.7, 128.5, 125.8 (q,  $J$  = 3.7 Hz), 125.0, 122.2, 63.4;



ESI-HRMS  $m/z$ : Calcd for  $C_{14}H_{11}F_3NaOS^+$   $[M+Na]^+$  307.0380, found 307.0378.

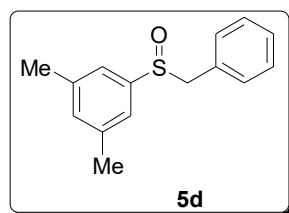

### 1,3-Dimethyl-5-phenylmethanesulfinylbenzene (5d):

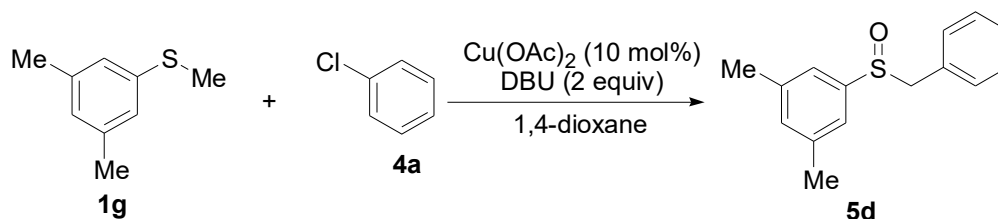

A solution of 1,3-dimethyl-5-methylsulfanylbenzene **1g** (0.5 mmol, 76.2 mg), chlorobenzene **4a** (0.6 mmol, 67.6 mg),  $Cu(OAc)_2$  (10 mol%, 9.1 mg), and DBU (2 equiv, 152.2 mg) in 1,4-dioxane (3 mL) was stirred under air. After stirred at 110 °C for 10 h, it was cooled to room temperature. Then the reaction mixture was quenched with saturated salt water (10 mL). After that, the solution was extracted with ethyl acetate ( $3 \times 10$  mL), and then washed with saturated  $Na_2CO_3$  solution. The organic layers were combined and dried by  $Na_2SO_4$  and concentrated in vacuo. The pure product 1,3-dimethyl-5-phenylmethanesulfinylbenzene **5d** (110.0 mg, 90% yield) was afforded by flash column chromatography on silica gel (cyclohexane/ethyl acetate = 4:1).

$^1H$  NMR (400 MHz,  $CDCl_3$ )  $\delta$  7.34–7.25 (m, 3 H), 7.09 (s, 1 H), 7.03 (dd,  $J = 7.5, 1.6$  Hz, 2 H), 6.99 (s, 2 H), 4.08 (d,  $J = 12.5$  Hz, 1 H), 3.97 (d,  $J = 12.5$  Hz, 1 H), 2.32 (s, 6 H);

$^{13}C$  NMR (100 MHz,  $CDCl_3$ )  $\delta$  142.6, 138.8, 132.9, 130.5, 129.6, 128.4, 128.3, 121.9, 63.9, 21.3;

ESI-HRMS  $m/z$ : Calcd for  $C_{15}H_{16}NaOS^+$   $[M+Na]^+$  267.0820, found 267.0821.

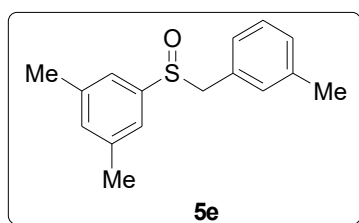

### 1,3-Dimethyl-5-m-tolylmethanesulfinylbenzene (5e):

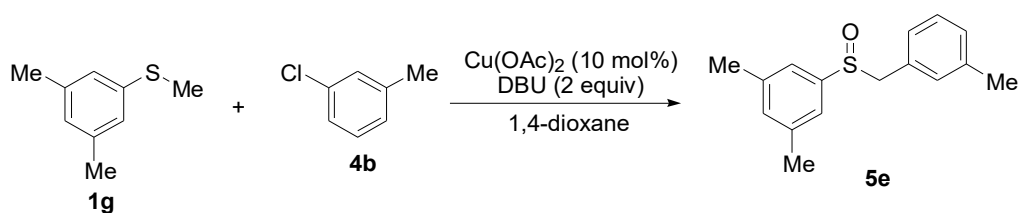

A solution of 1,3-dimethyl-5-methylsulfanylbenzene **1g** (0.5 mmol, 76.2 mg), 1-chloro-3-methylbenzene **4b** (0.6 mmol, 76.0 mg),  $\text{Cu}(\text{OAc})_2$  (10 mol%, 9.1 mg), and DBU (2 equiv, 152.2 mg) in 1,4-dioxane (3 mL) was stirred under air. After stirred at 110 °C for 10 h, it was cooled to room temperature. Then the reaction mixture was quenched with saturated salt water (10 mL). After that, the solution was extracted with ethyl acetate ( $3 \times 10$  mL), and then washed with saturated  $\text{Na}_2\text{CO}_3$  solution. The organic layers were combined and dried by  $\text{Na}_2\text{SO}_4$  and concentrated in vacuo. The pure product 1,3-dimethyl-5-m-tolylmethanesulfinylbenzene **5e** (104.6 mg, 81% yield) was afforded by flash column chromatography on silica gel (cyclohexane/ethyl acetate = 4:1).

$^1\text{H}$  NMR (400 MHz,  $\text{CDCl}_3$ )  $\delta$  7.16 (t,  $J = 7.5$  Hz, 1 H), 7.12–7.06 (m, 2 H), 7.00 (s, 2 H), 6.85 (s, 1 H), 6.82 (s, 1 H), 4.04 (d,  $J = 12.4$  Hz, 1 H), 3.89 (d,  $J = 12.4$  Hz, 1 H), 2.31 (s, 6 H), 2.28 (s, 3 H);

$^{13}\text{C}$  NMR (100 MHz,  $\text{CDCl}_3$ )  $\delta$  142.8, 138.8, 138.2, 132.9, 131.2, 129.5, 129.0, 128.4, 127.5, 122.0, 64.1, 21.3, 21.3;

ESI-HRMS  $m/z$ : Calcd for  $\text{C}_{16}\text{H}_{18}\text{NaOS}^+$  [ $\text{M}+\text{Na}$ ] $^+$  281.0976, found 281.0974.

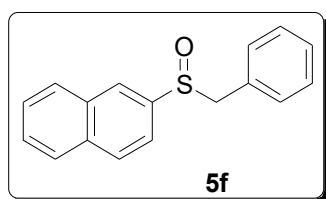

## 2-Phenylmethanesulfinylnaphthalene (5f):

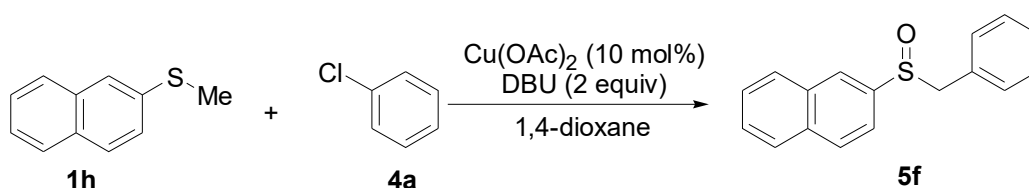

A solution of 2-methylsulfanyl-naphthalene **1h** (0.5 mmol, 87.2 mg), chlorobenzene **4a** (0.6 mmol, 67.6 mg),  $\text{Cu}(\text{OAc})_2$  (10 mol%, 9.1 mg), and DBU (2 equiv, 152.2 mg) in

1,4-dioxane (3 mL) was stirred under air. After stirred at 110 °C for 10 h, it was cooled to room temperature. Then the reaction mixture was quenched with saturated salt water (10 mL). After that, the solution was extracted with ethyl acetate (3 × 10 mL), and then washed with saturated Na<sub>2</sub>CO<sub>3</sub> solution. The organic layers were combined and dried by Na<sub>2</sub>SO<sub>4</sub> and concentrated in vacuo. The pure product 2-phenylmethanesulfinyl naphthalene **5f** (106.6 mg, 86% yield) was afforded by flash column chromatography on silica gel (cyclohexane/ethyl acetate = 3:1).

<sup>1</sup>H NMR (400 MHz, CDCl<sub>3</sub>) δ 7.96–7.87 (m, 3 H), 7.84 (d, *J* = 8.6 Hz, 1 H), 7.64–7.53 (m, 2 H), 7.44 (dd, *J* = 8.6, 1.6 Hz, 1 H), 7.28 (m, 3 H), 7.01 (d, *J* = 7.0 Hz, 2 H), 4.18 (d, *J* = 12.6 Hz, 1 H), 4.11 (d, *J* = 12.6 Hz, 1 H);

<sup>13</sup>C NMR (100 MHz, CDCl<sub>3</sub>) δ 139.9, 134.6, 132.7, 130.5, 129.2, 129.0, 128.5, 128.3, 128.1, 127.8, 127.2, 125.3, 120.3, 63.5.;

ESI-HRMS *m/z*: Calcd for C<sub>17</sub>H<sub>14</sub>NaOS<sup>+</sup> [*M*+Na]<sup>+</sup> 289.0663, found 289.0661.

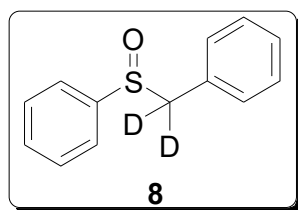

#### Dideuterobenzylsulfinylbenzene (**8**):

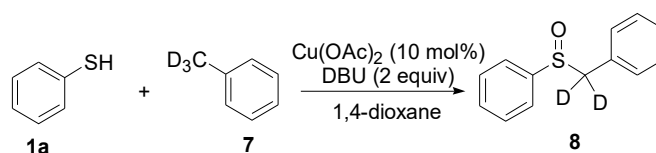

A solution of thiophenol **1a** (0.5 mmol, 55.1 mg), trideuteromethylbenzene **7** (0.6 mmol, 57.1 mg), Cu(OAc)<sub>2</sub> (10 mol%, 9.1 mg), and DBU (2 equiv, 152.2 mg) in 1,4-dioxane (3 mL) was stirred under air. After stirred at 110 °C for 10 h, it was cooled to room temperature. Then the reaction mixture was quenched with saturated salt water (10 mL). After that, the solution was extracted with ethyl acetate (3×10 mL), and then washed with saturated Na<sub>2</sub>CO<sub>3</sub> solution. The organic layers were combined and dried by Na<sub>2</sub>SO<sub>4</sub> and concentrated in vacuo. The pure product dideuterobenzylsulfinylbenzene **8** (91.7 mg, 84% yield) was afforded by flash column chromatography on silica gel (cyclohexane/ethyl acetate = 5:1).

$^1\text{H}$  NMR (400 MHz,  $\text{CDCl}_3$ )  $\delta$  7.50–7.36 (m, 5 H), 7.33–7.22 (m, 3 H), 7.04–6.93 (m, 2 H);

$^{13}\text{C}$  NMR (100 MHz,  $\text{CDCl}_3$ )  $\delta$  142.8, 131.2, 130.4, 129.2, 128.9, 128.5, 128.3, 124.5, 63.6;

ESI-HRMS  $m/z$ : Calcd for  $\text{C}_{13}\text{H}_{10}\text{D}_2\text{NaOS}^+$   $[\text{M}+\text{Na}]^+$  241.0630, found 241.0633.

## Spectrums

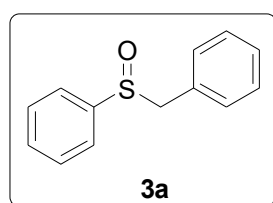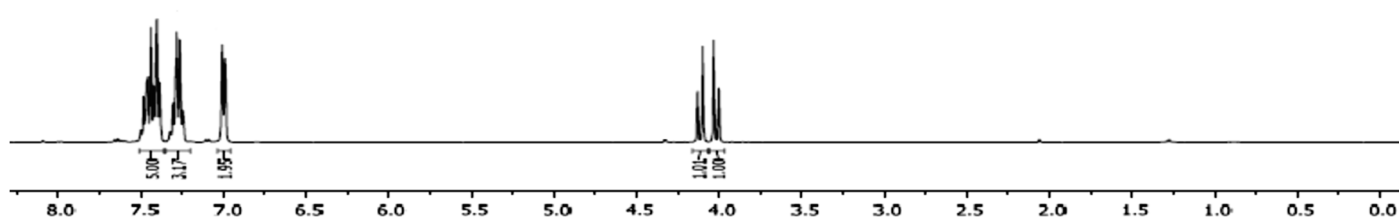

Figure S1.  $^1\text{H}$ -NMR 3a

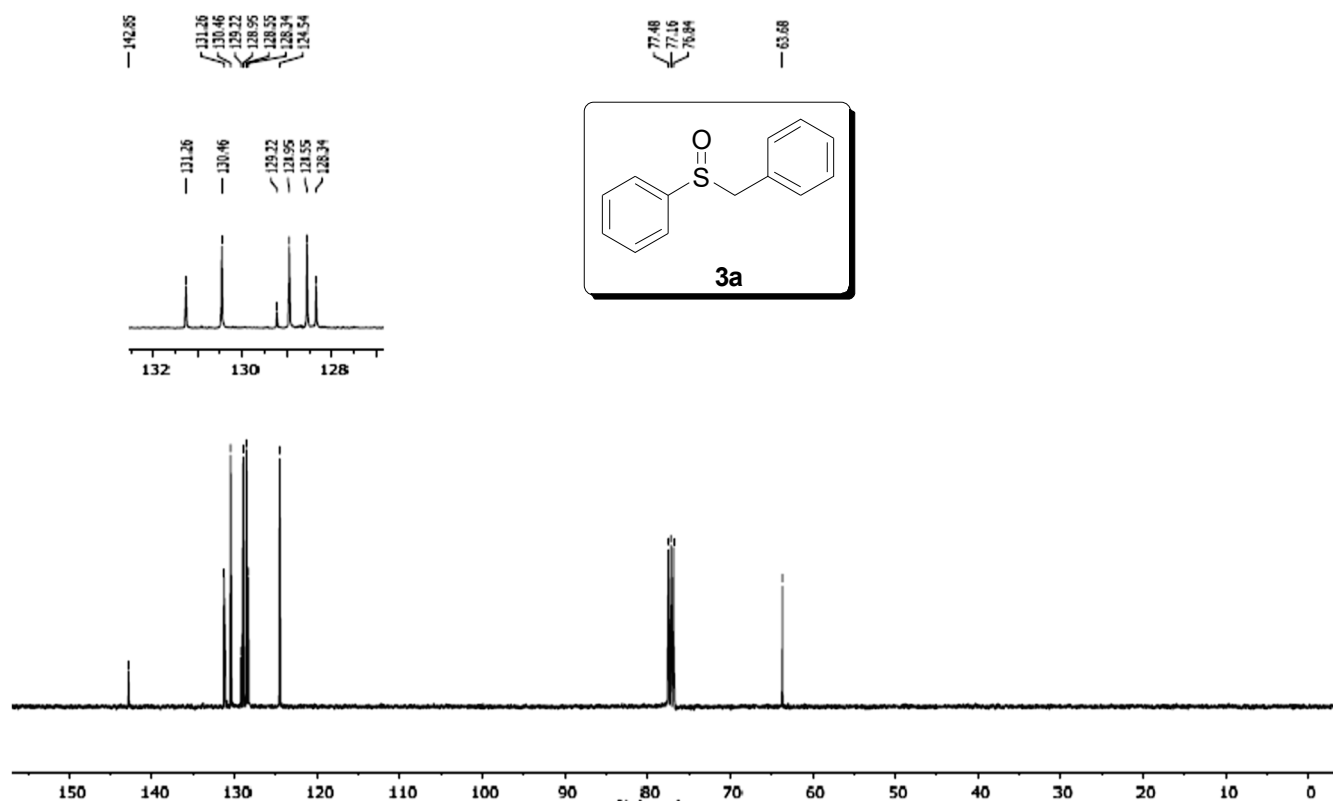Figure S2.  $^{13}\text{C}$ -NMR **3a**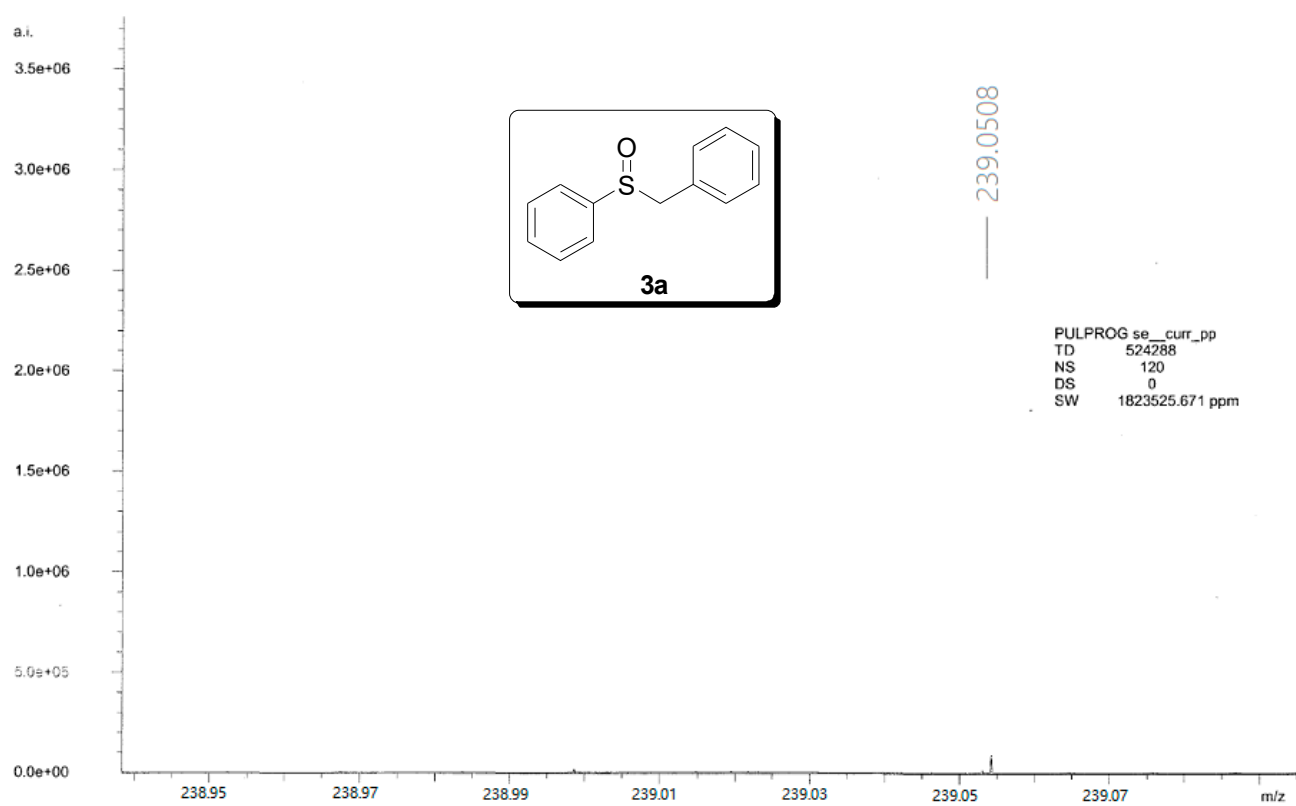Figure S3. ESI-HRMS **3a**

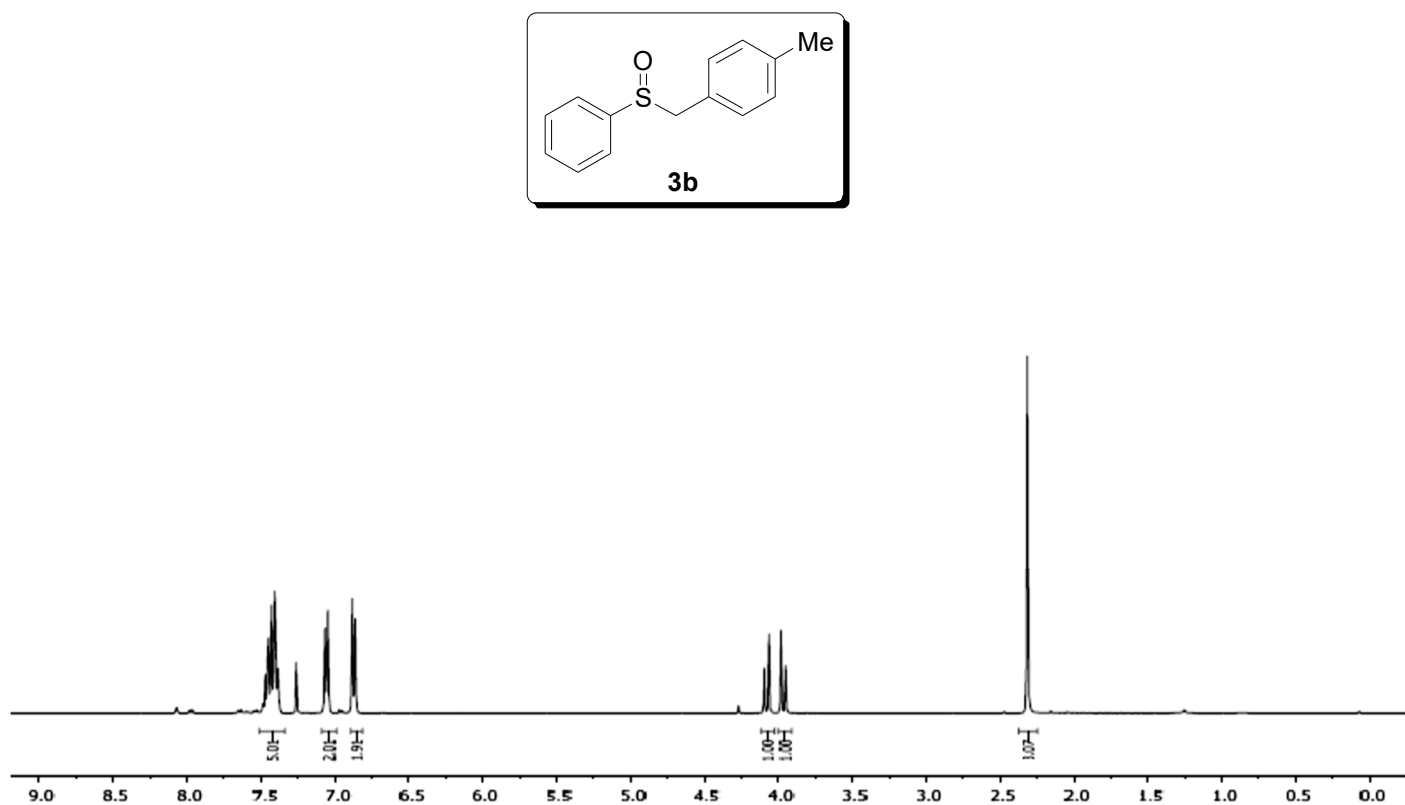Figure S4. <sup>1</sup>H-NMR **3b**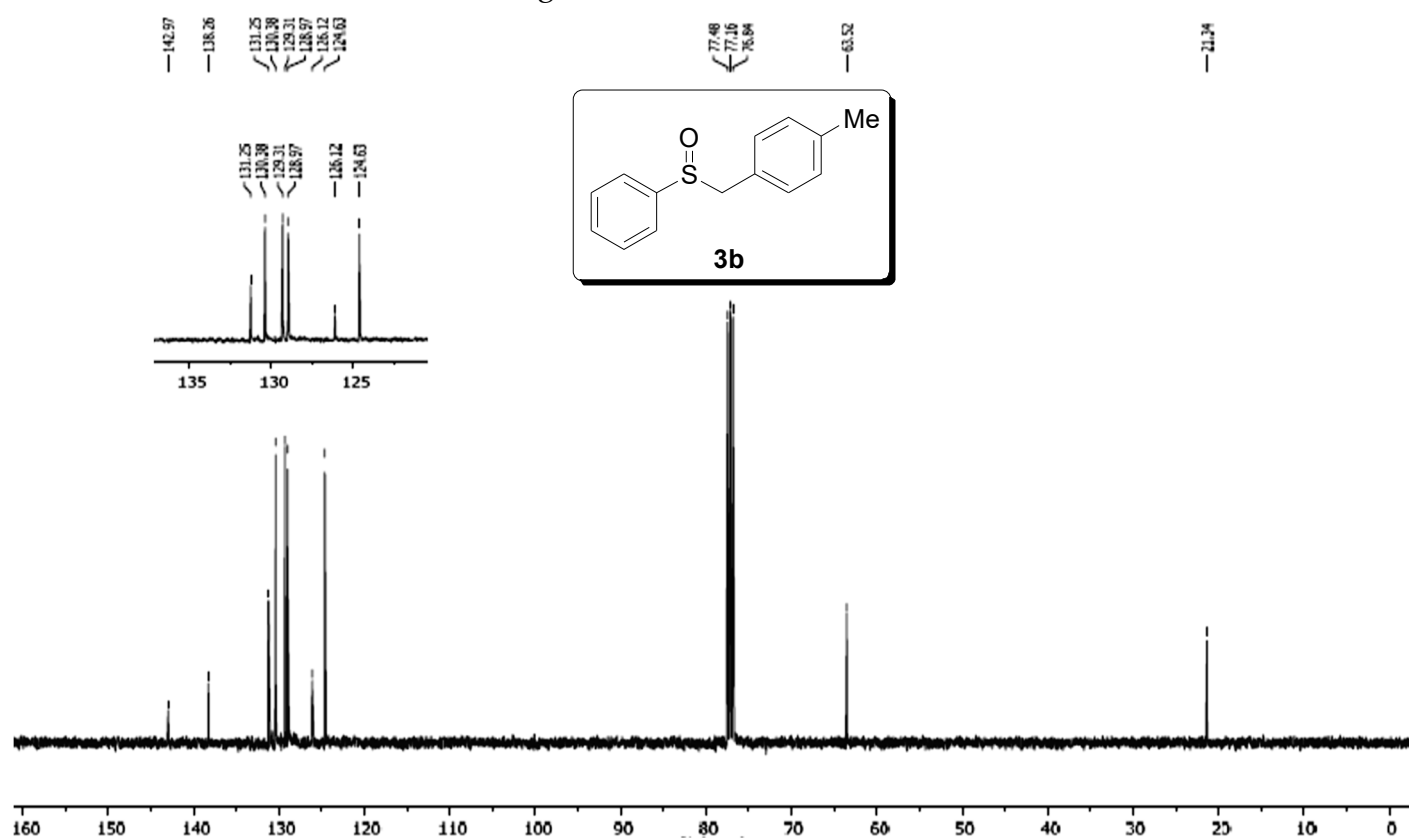Figure S5. <sup>13</sup>C-NMR **3b**

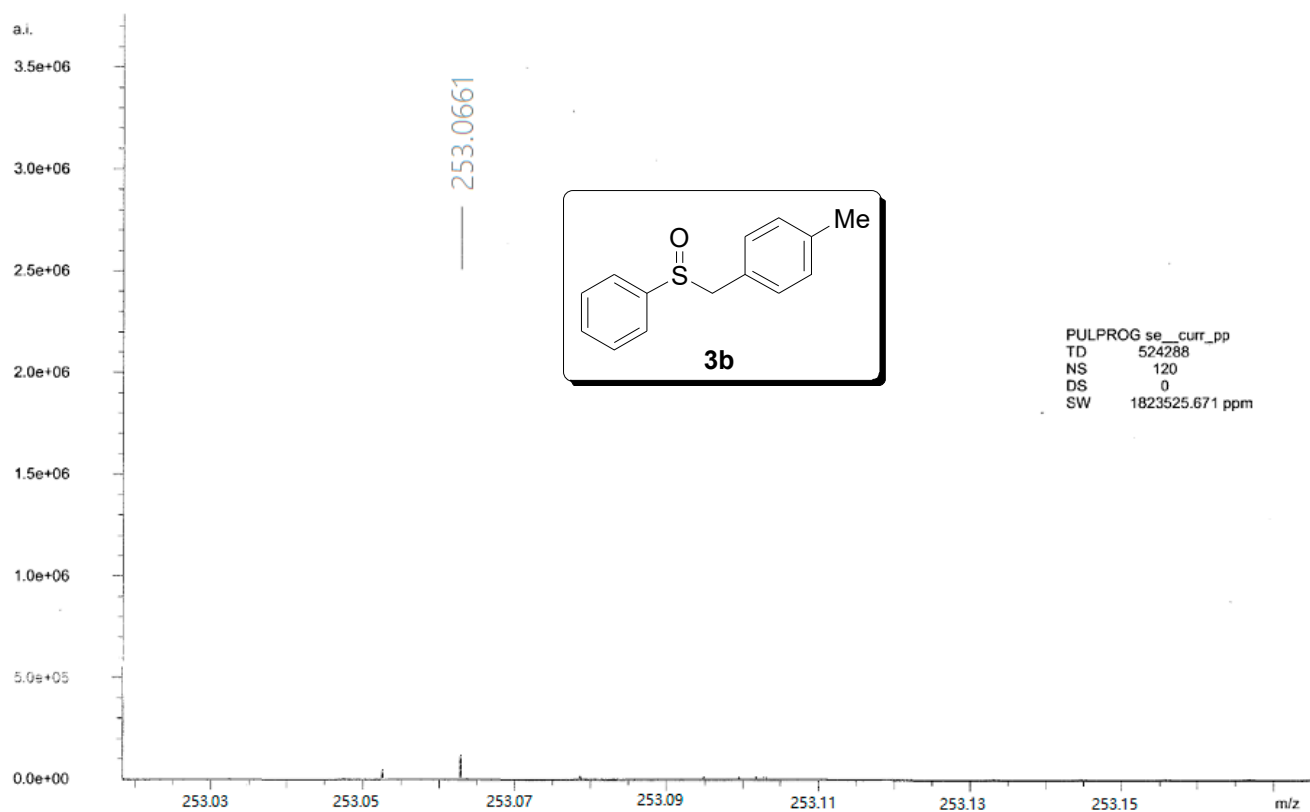Figure S6. ESI-HRMS **3b**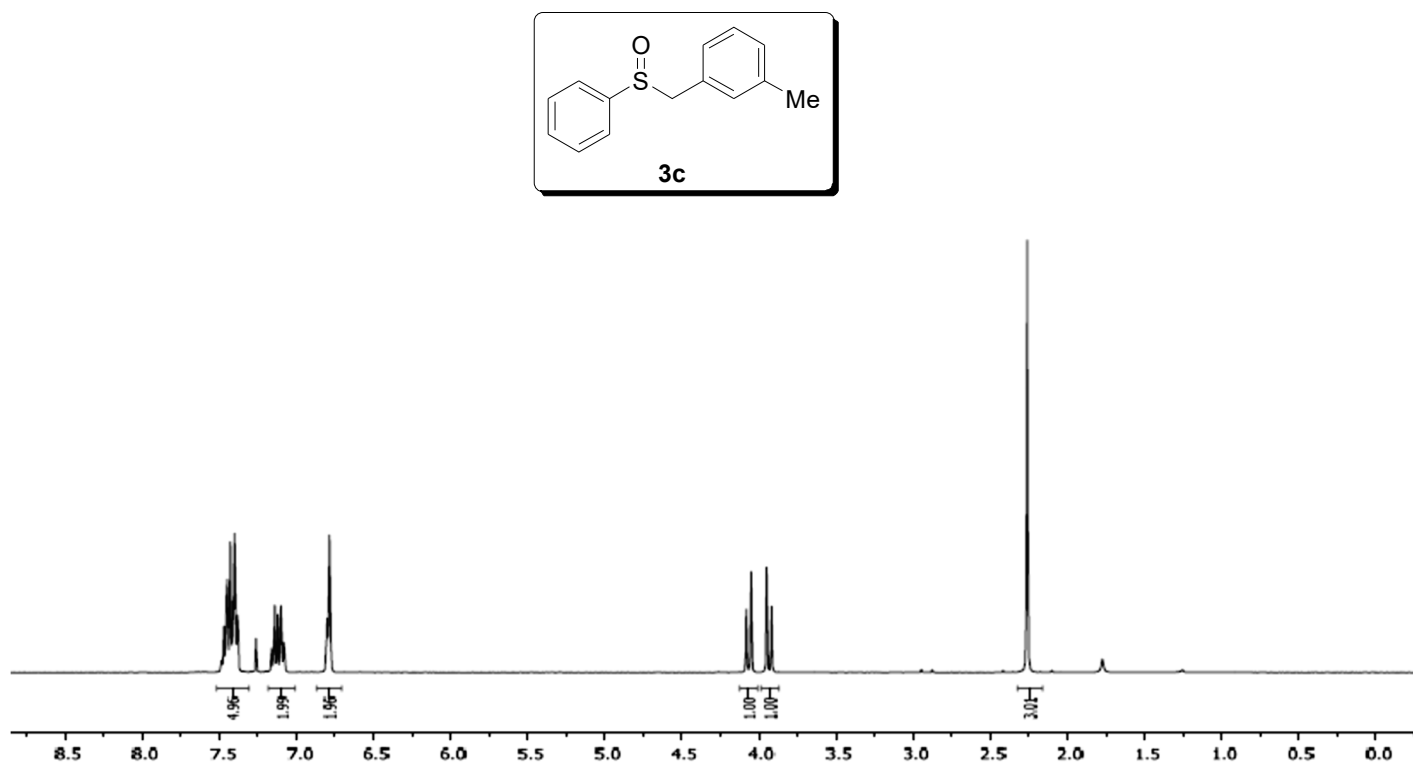Figure S7.  $^1\text{H}$ -NMR **3c**

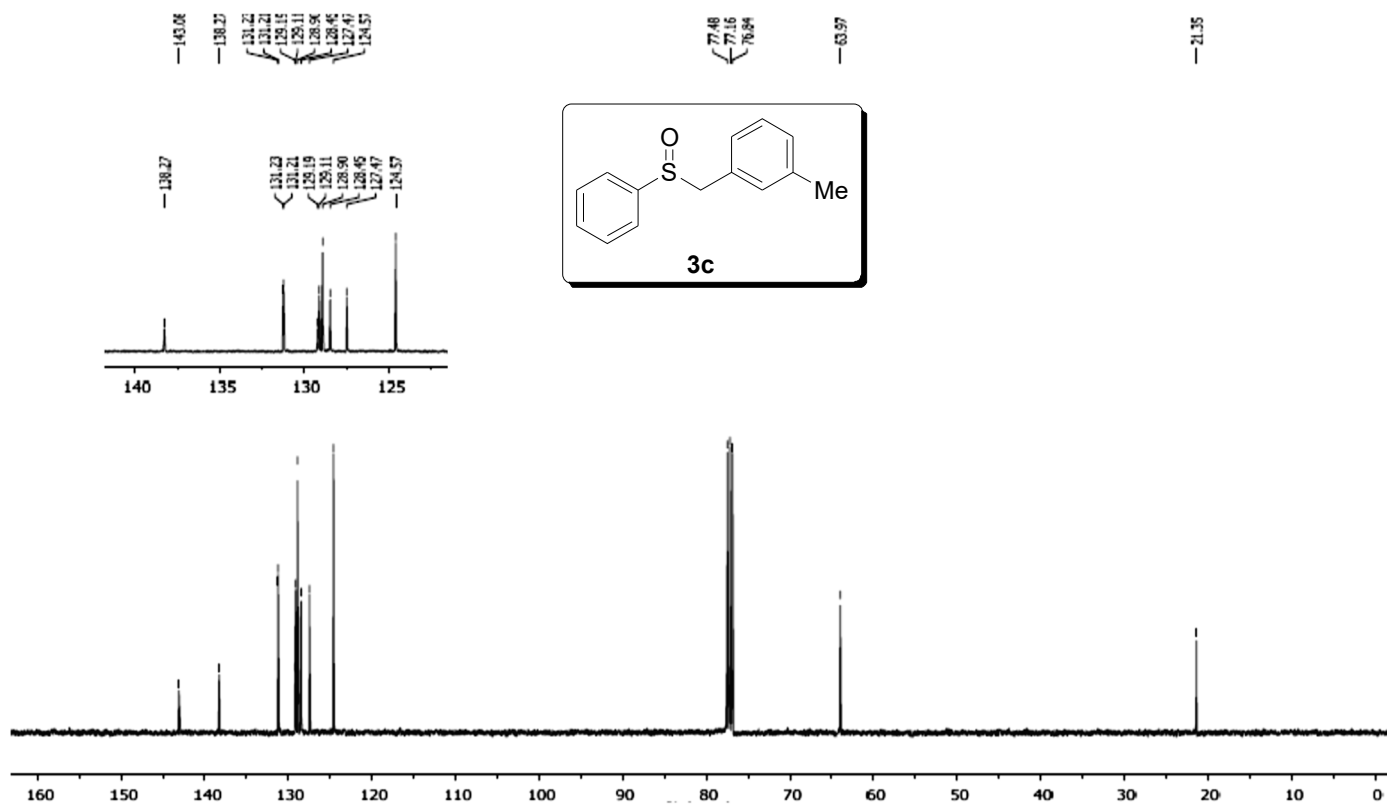Figure S8. <sup>13</sup>C-NMR **3c**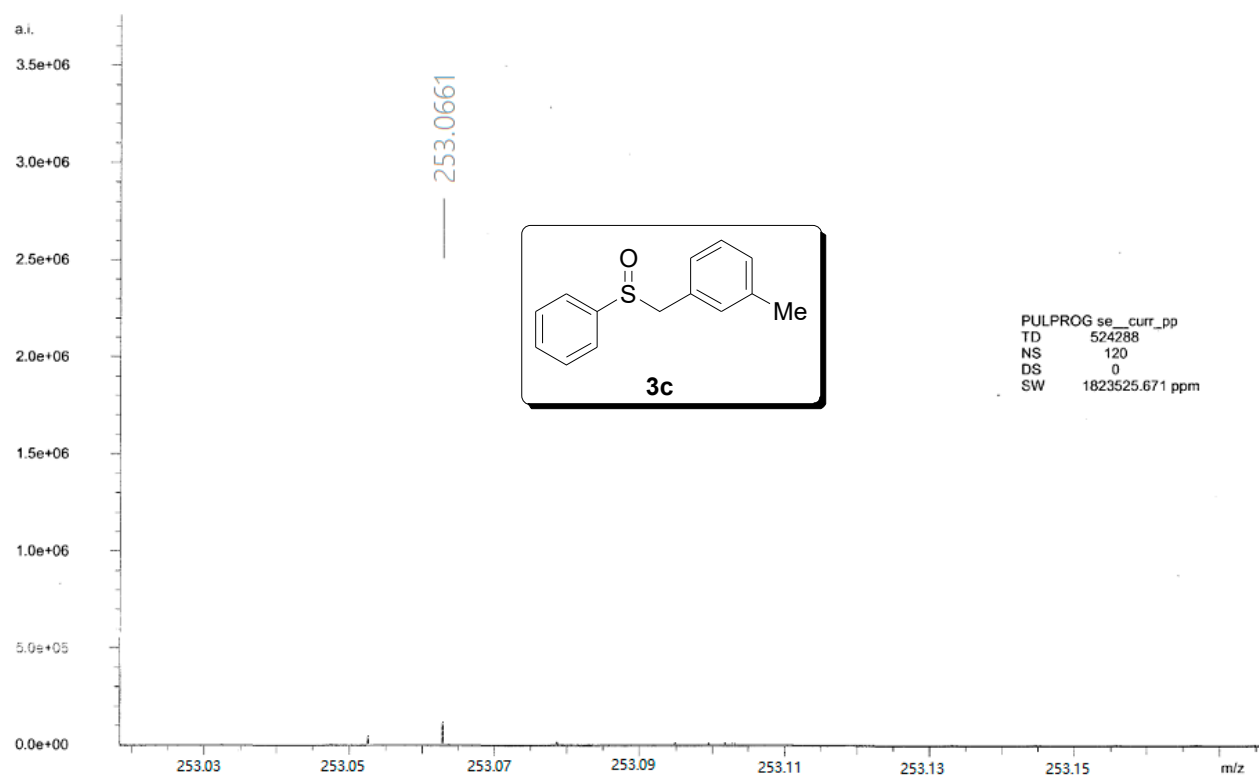Figure S9. ESI-HRMS **3c**



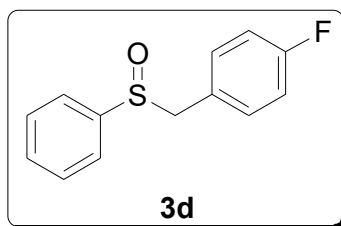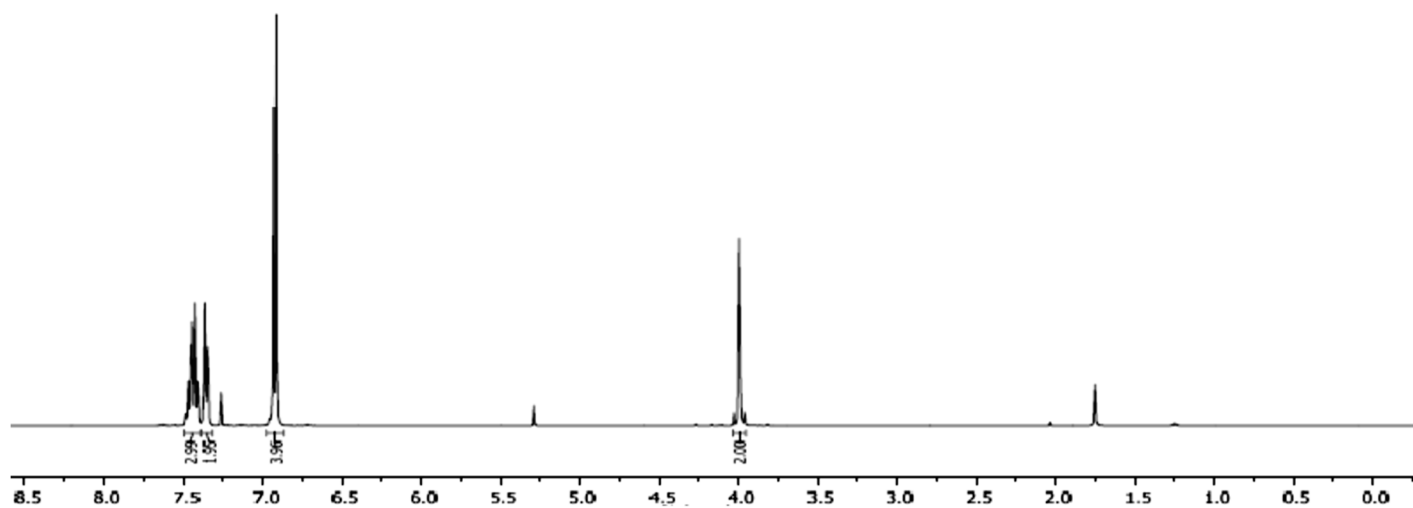Figure S10. <sup>1</sup>H-NMR **3d**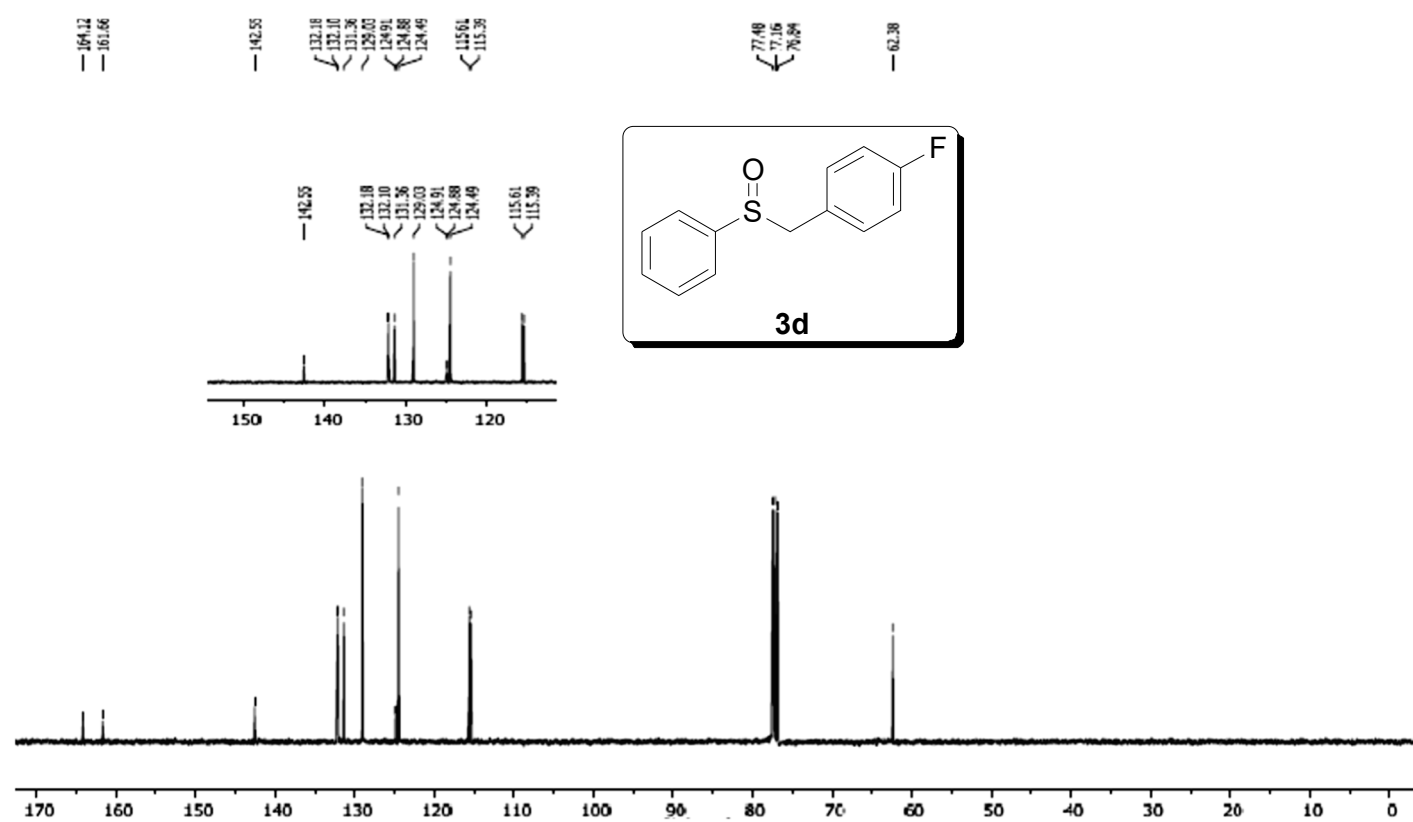Figure S11. <sup>13</sup>C-NMR **3d**

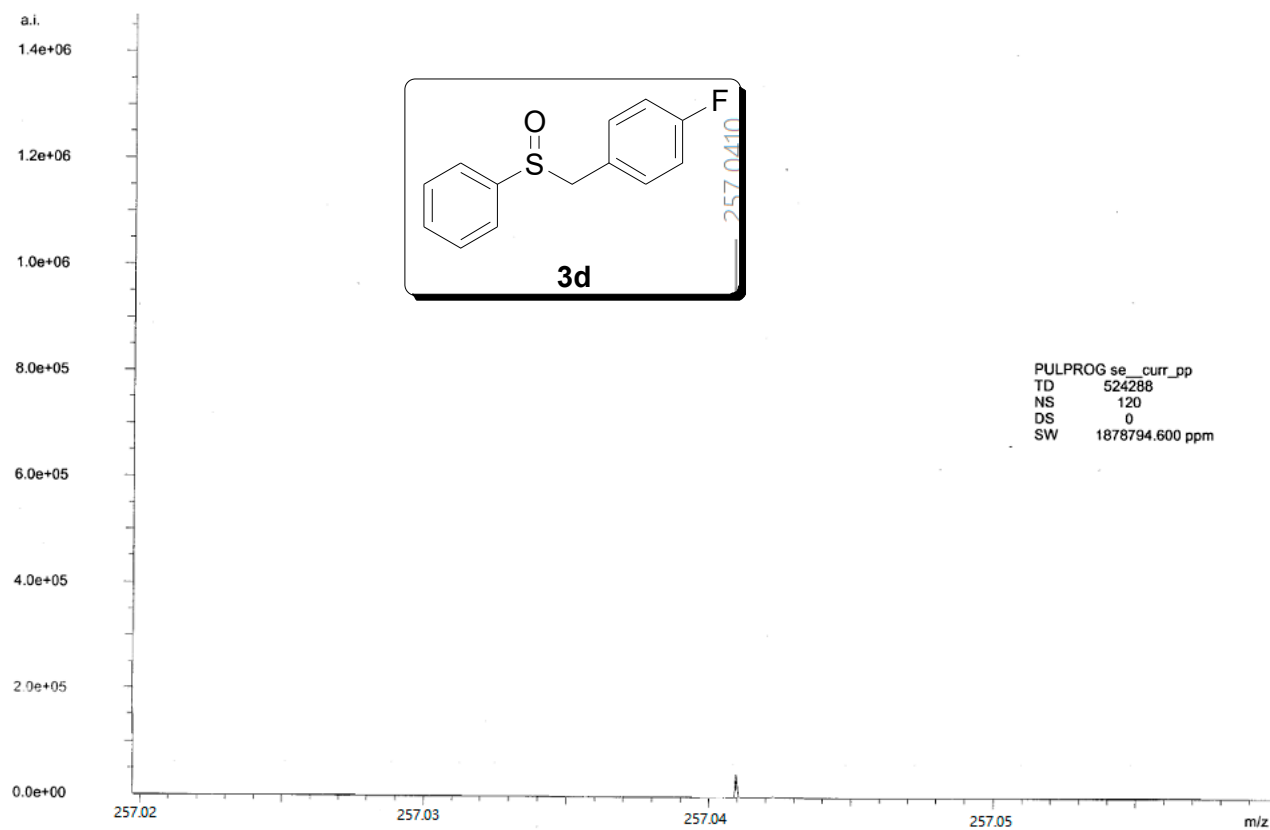Figure S12. ESI-HRMS **3d**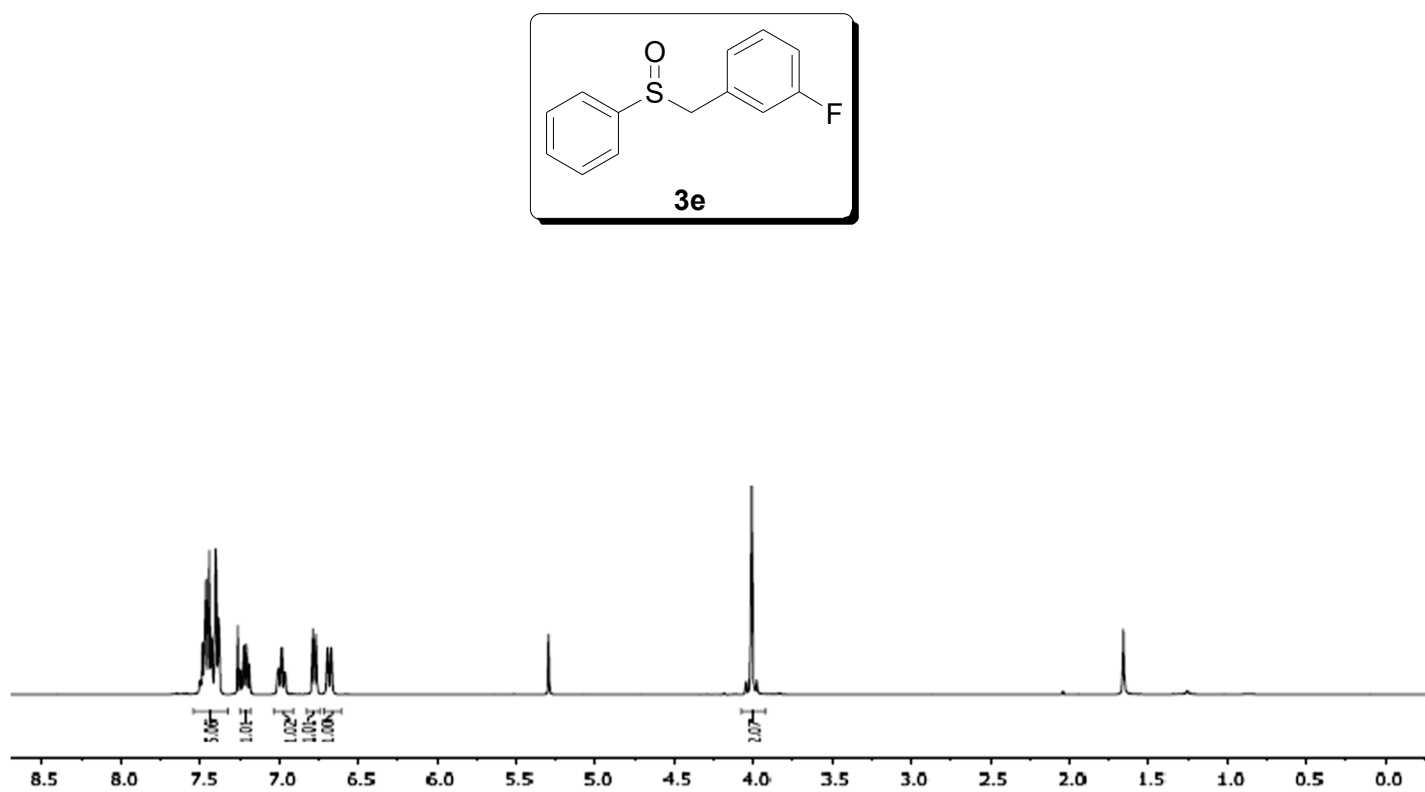Figure S13.  $^1\text{H}$ -NMR **3e**

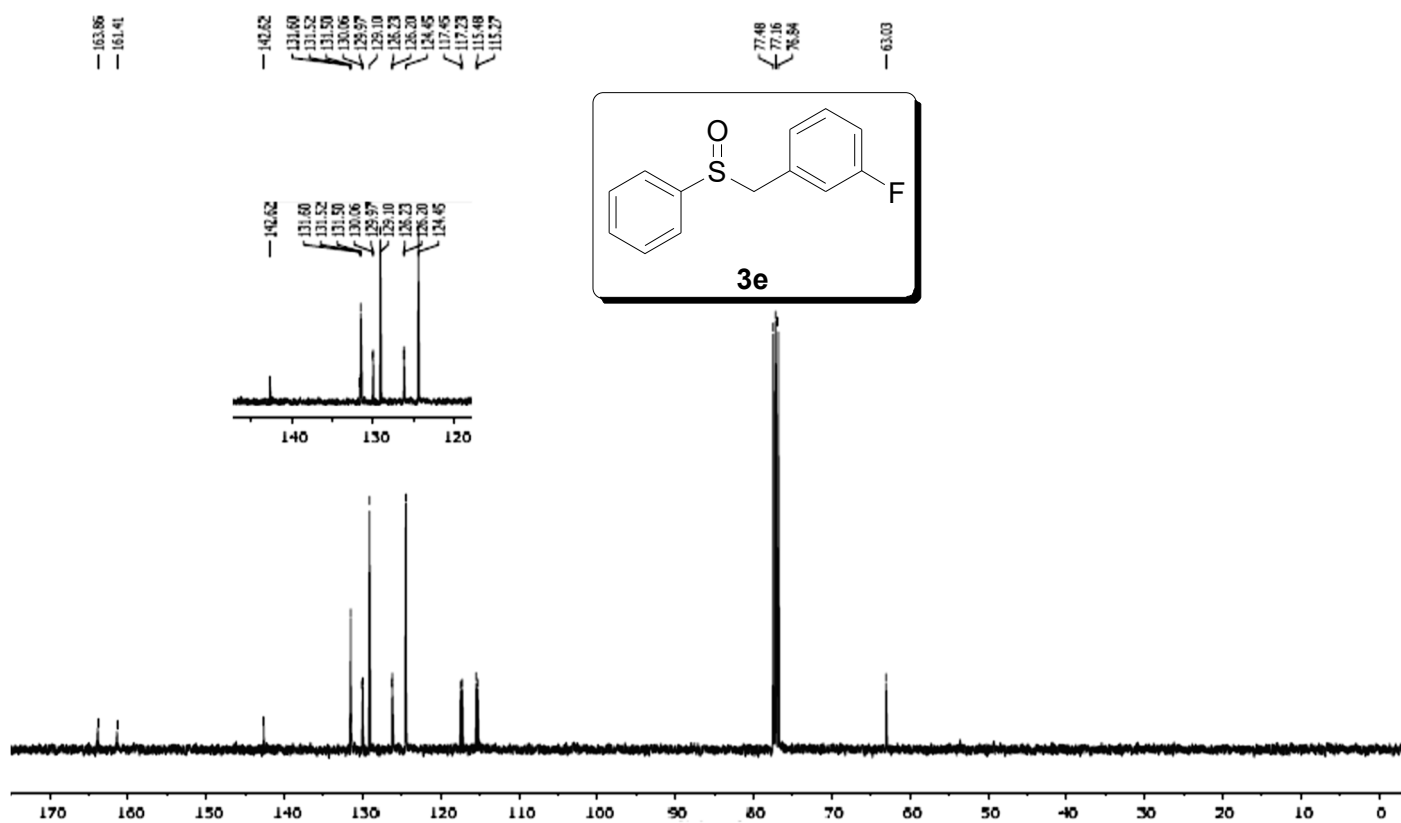Figure S14. <sup>13</sup>C-NMR **3e**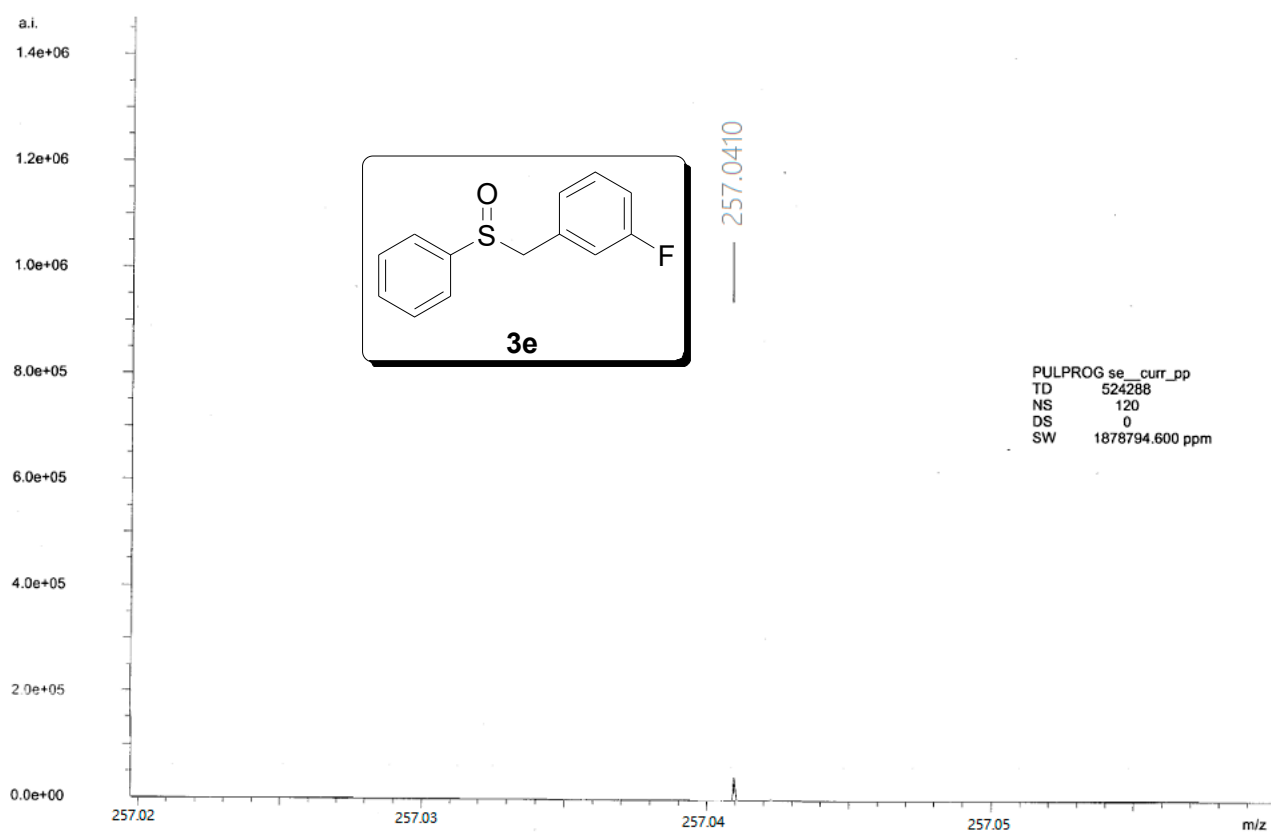Figure S15. ESI-HRMS **3e**

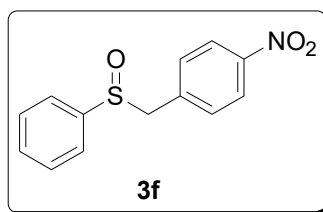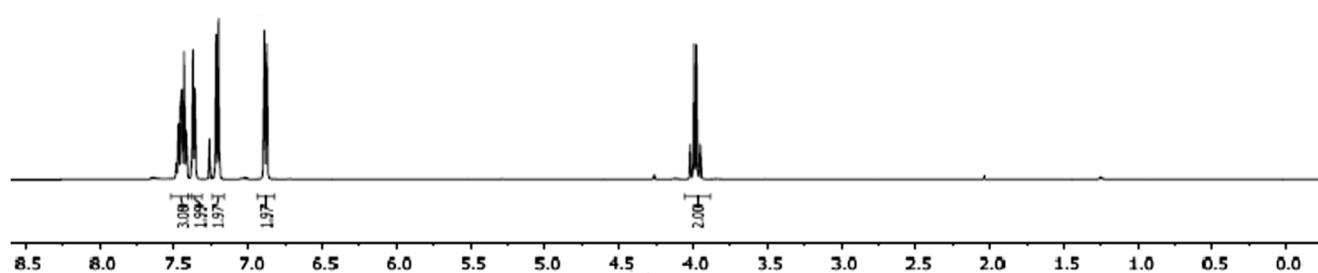Figure S16. <sup>1</sup>H-NMR **3f**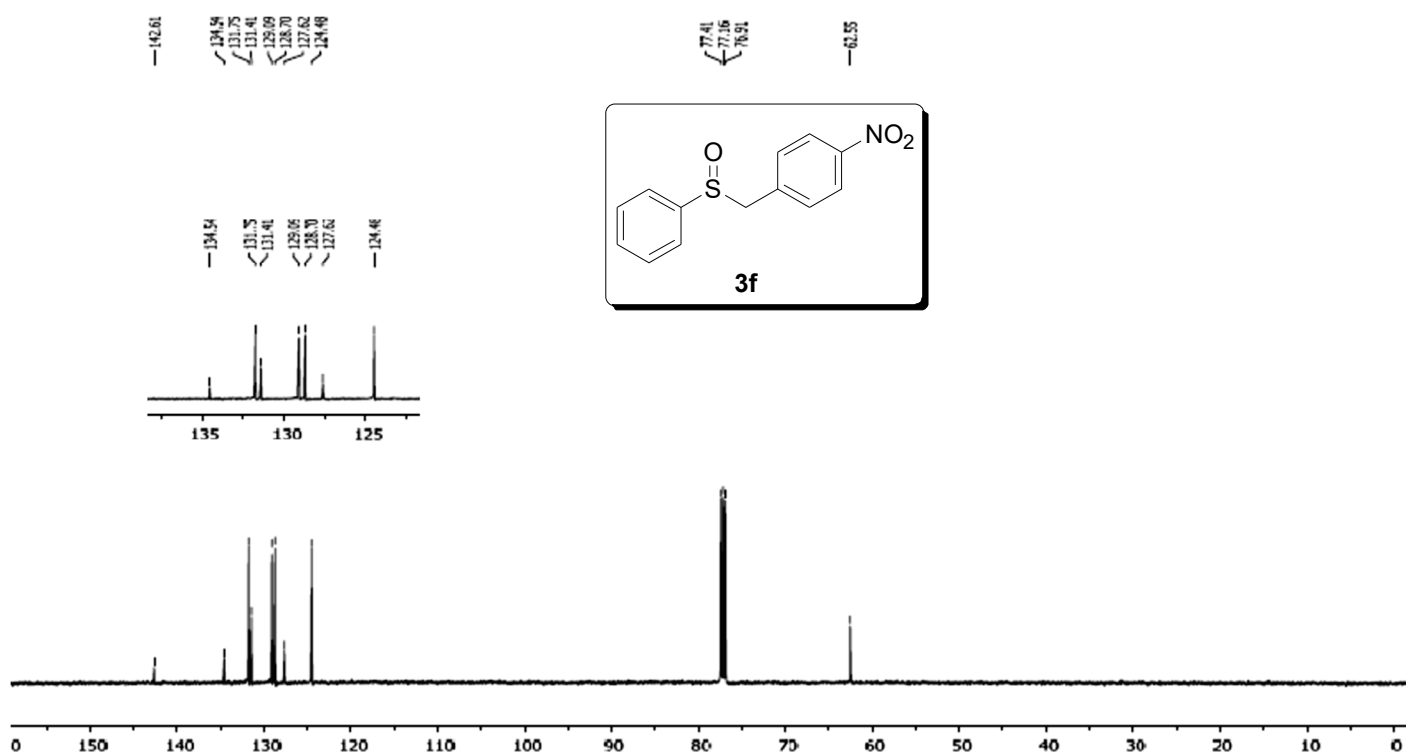Figure S17. <sup>13</sup>C-NMR **3f**

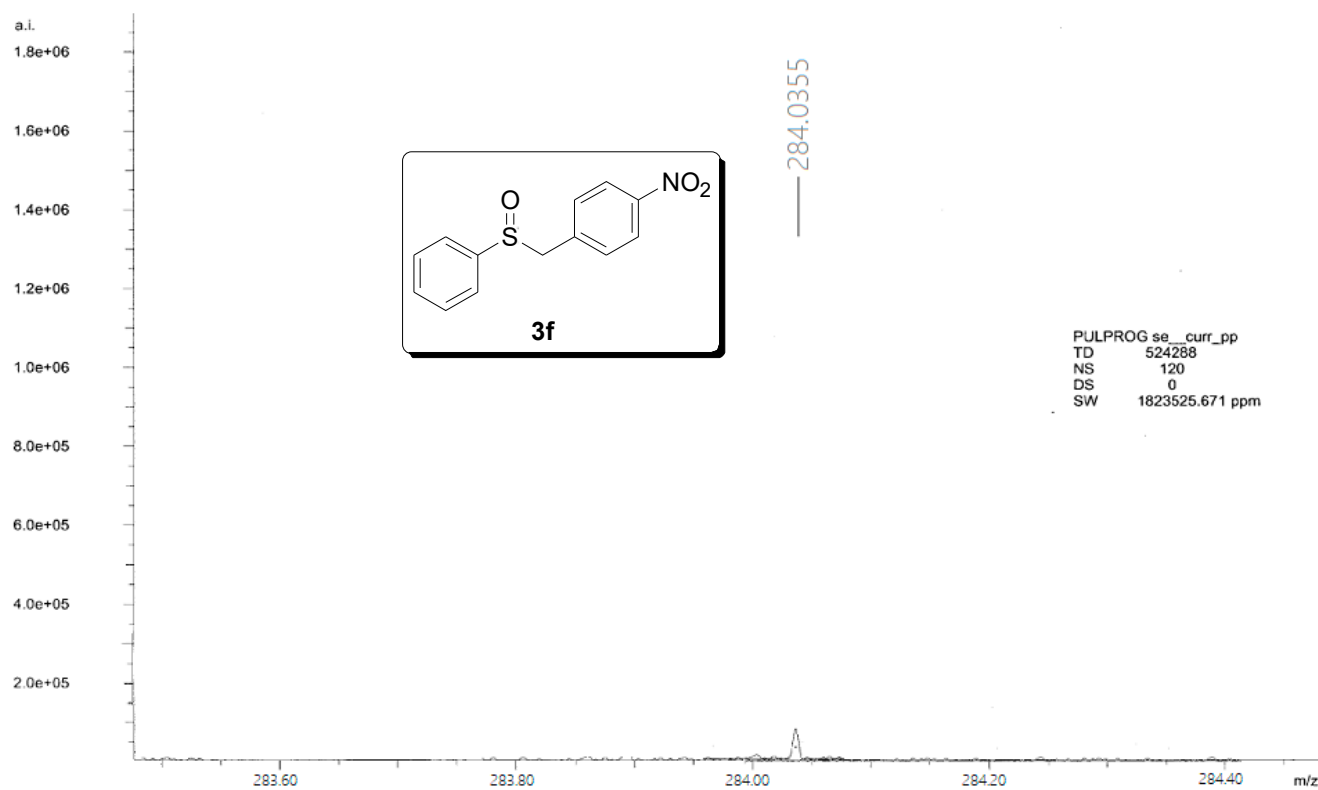Figure S18. ESI-HRMS **3f**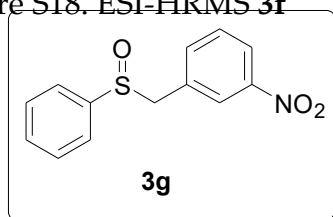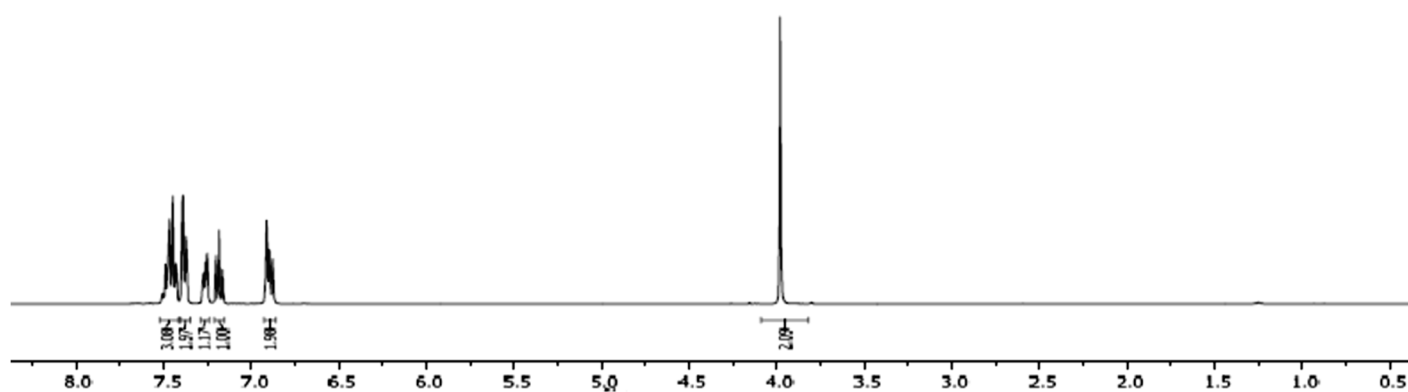Figure S19.  $^1\text{H}$ -NMR **3g**

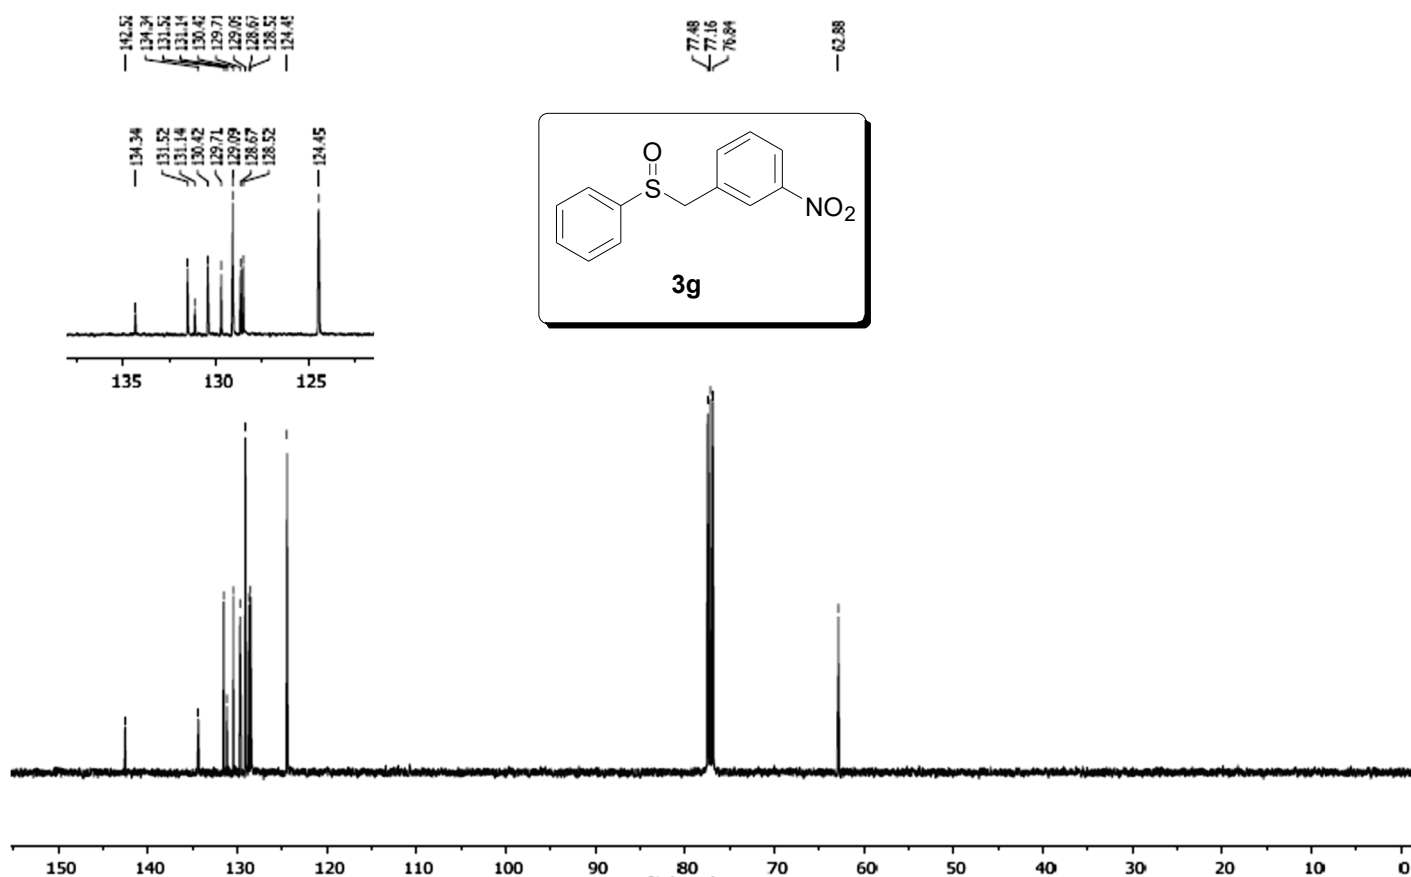Figure S20. <sup>13</sup>C-NMR **3g**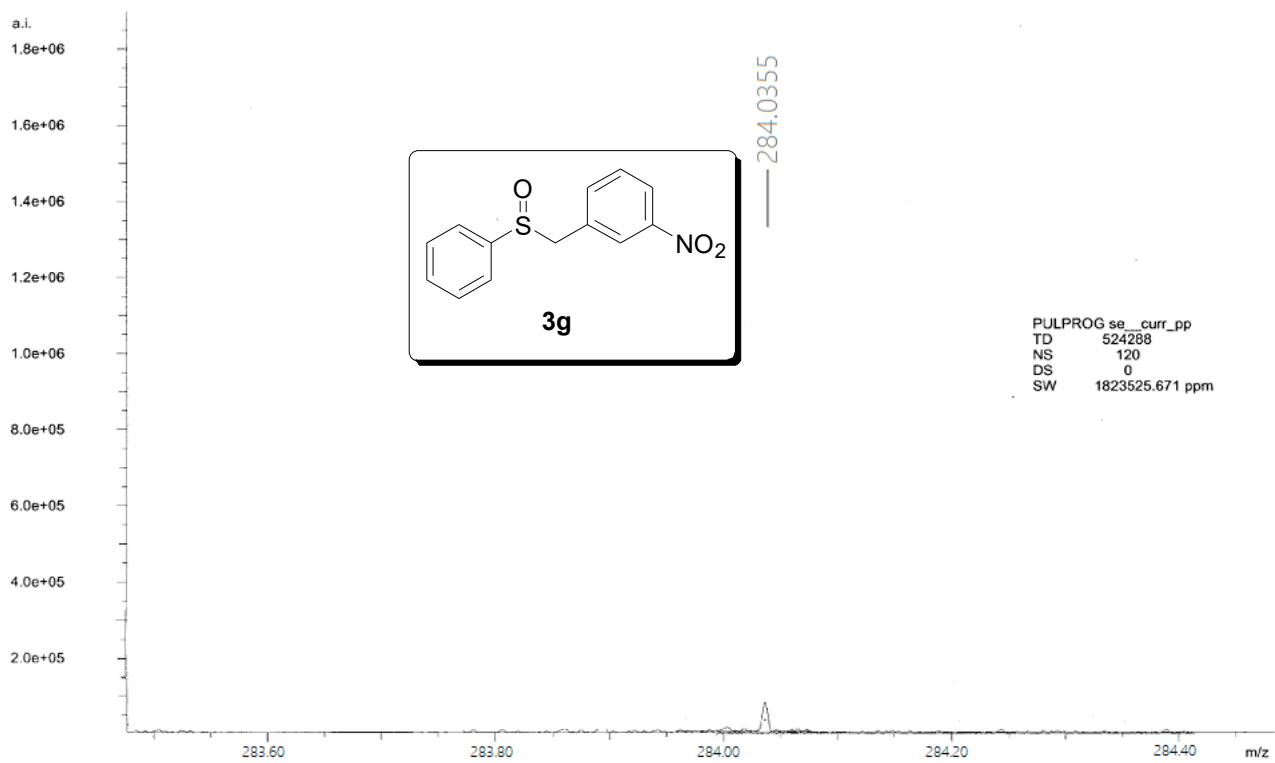Figure S21. ESI-HRMS **3g**

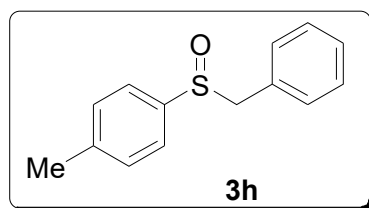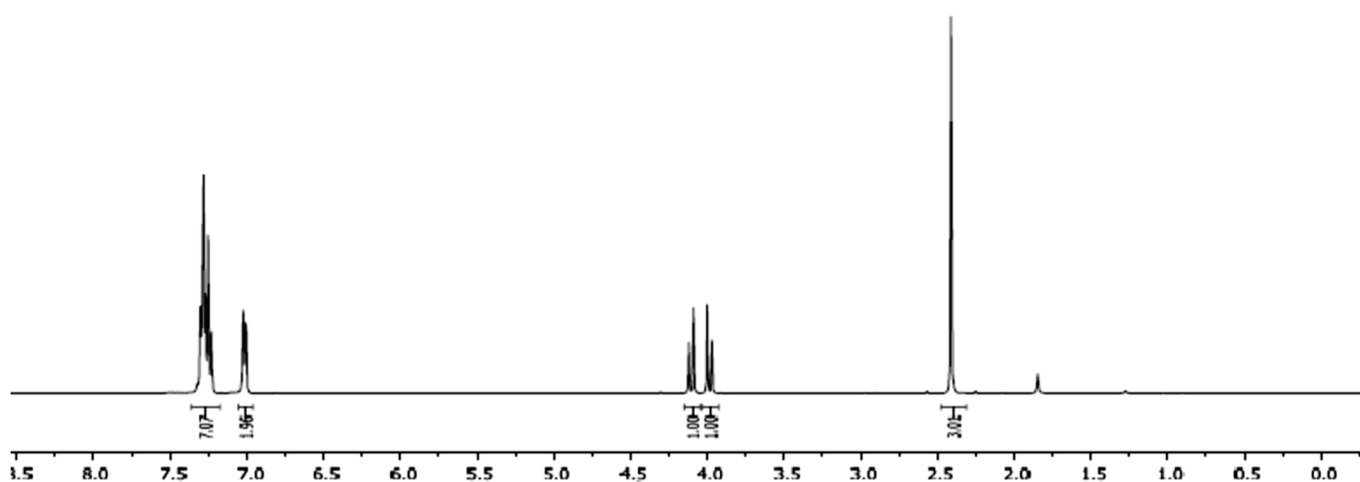Figure S22.  $^1\text{H}$ -NMR 3h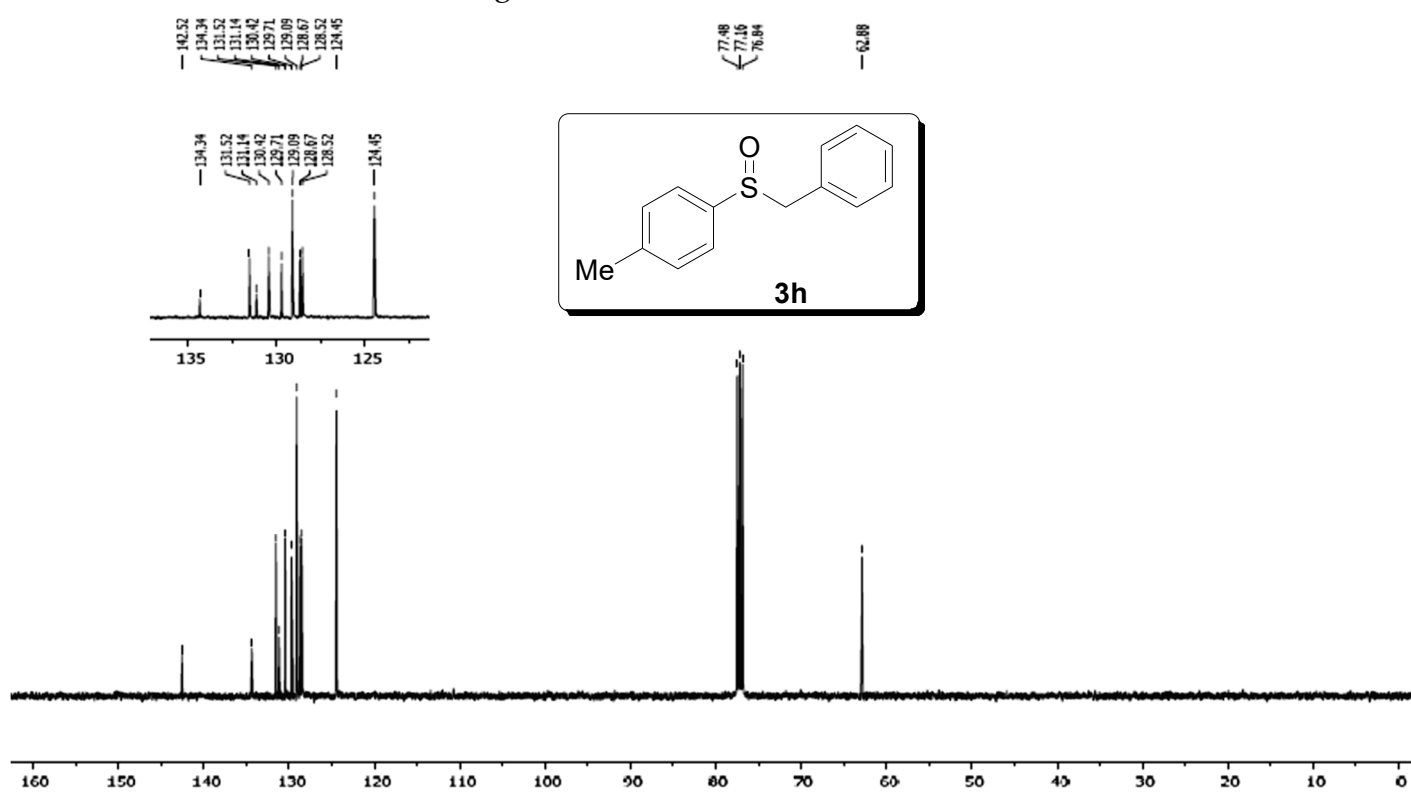Figure S23.  $^{13}\text{C}$ -NMR 3h

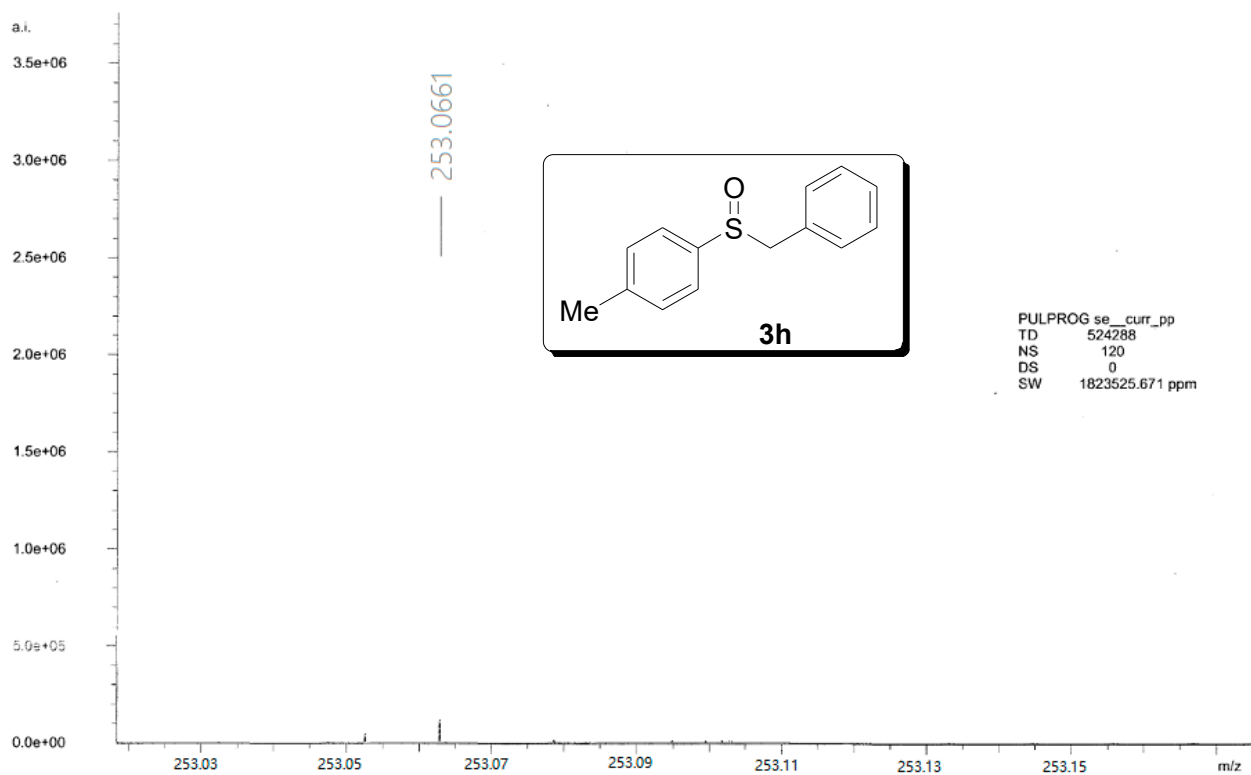Figure 24. ESI-MS **3h**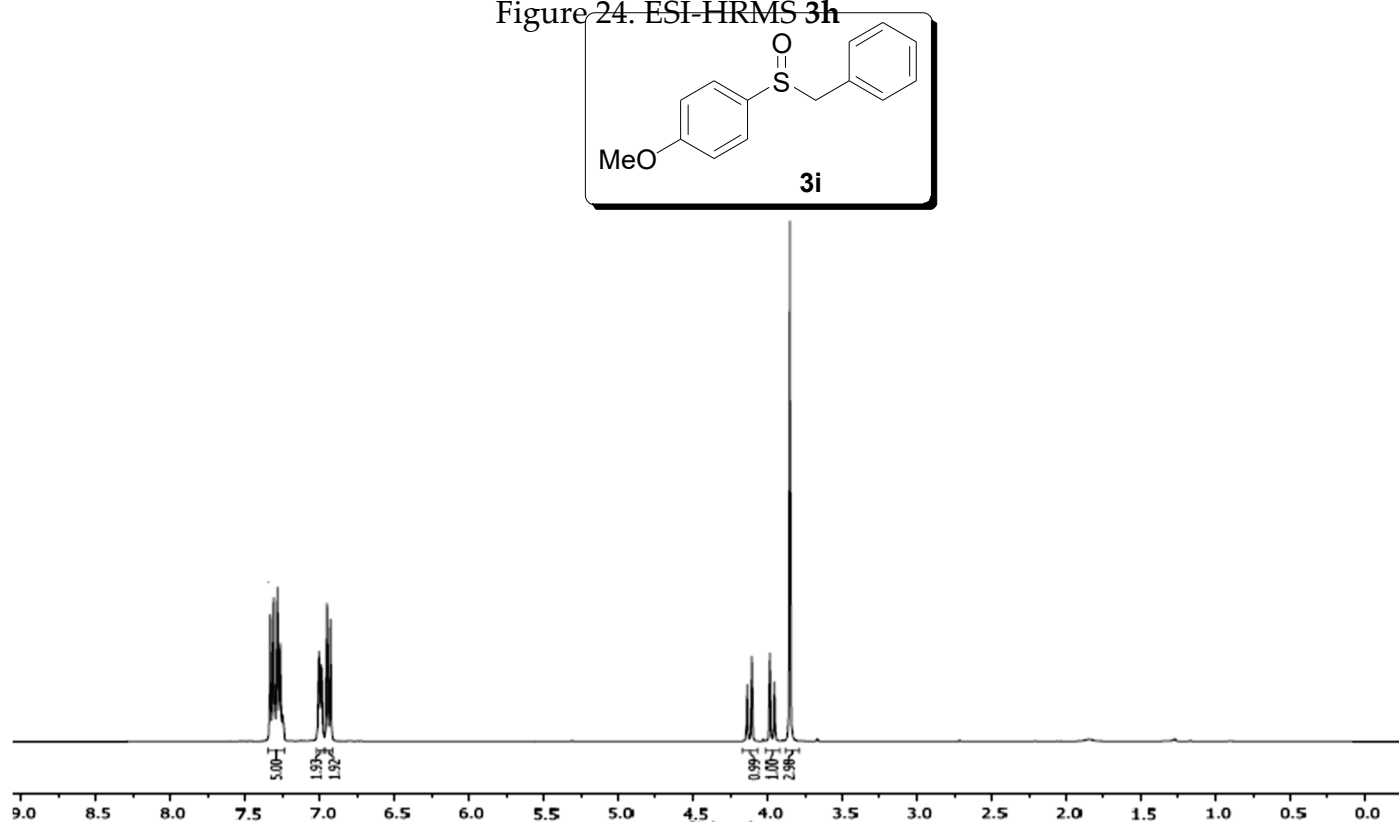Figure S25.  $^1\text{H}$ -NMR **3i**



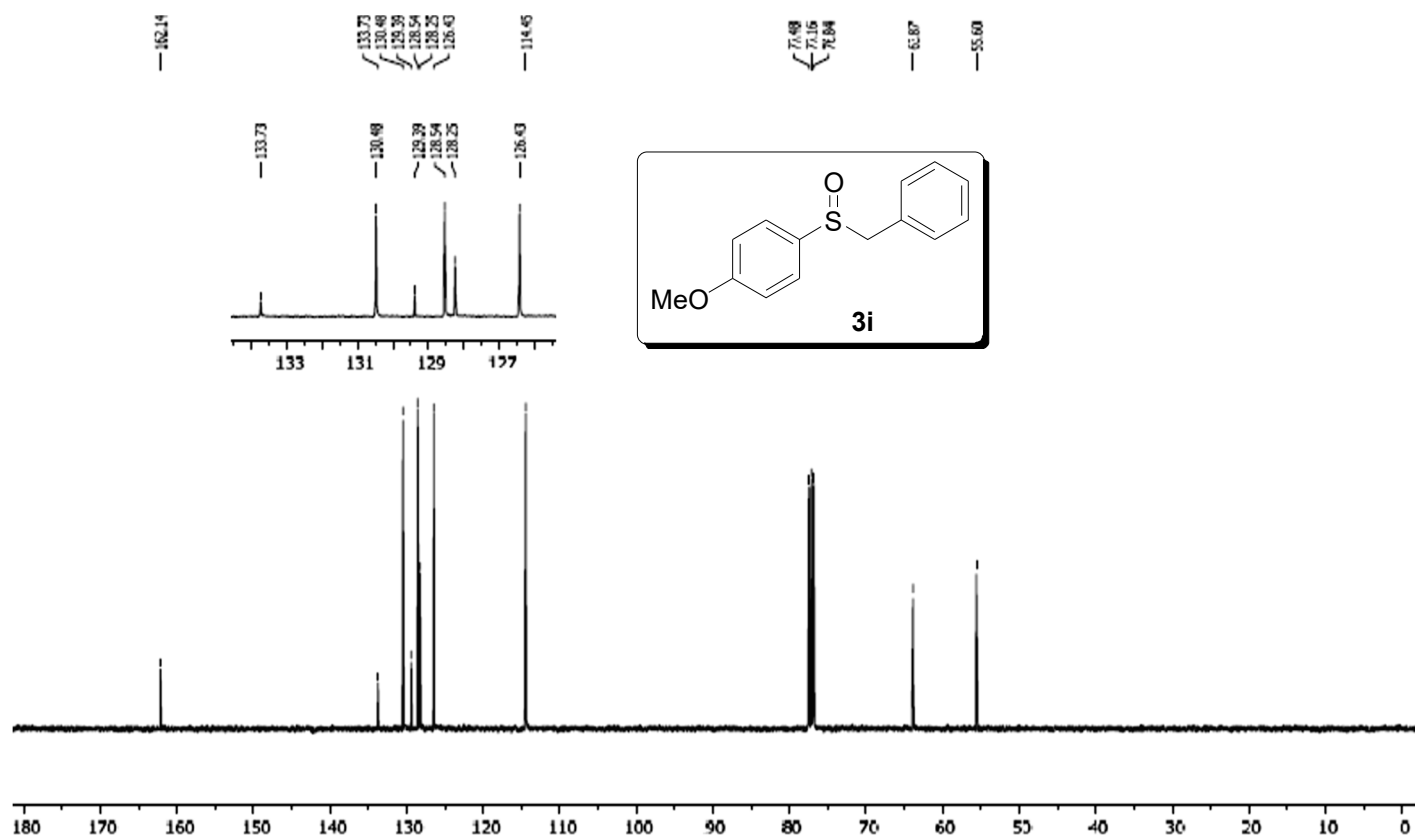Figure S26.  $^{13}\text{C}$ -NMR **3i**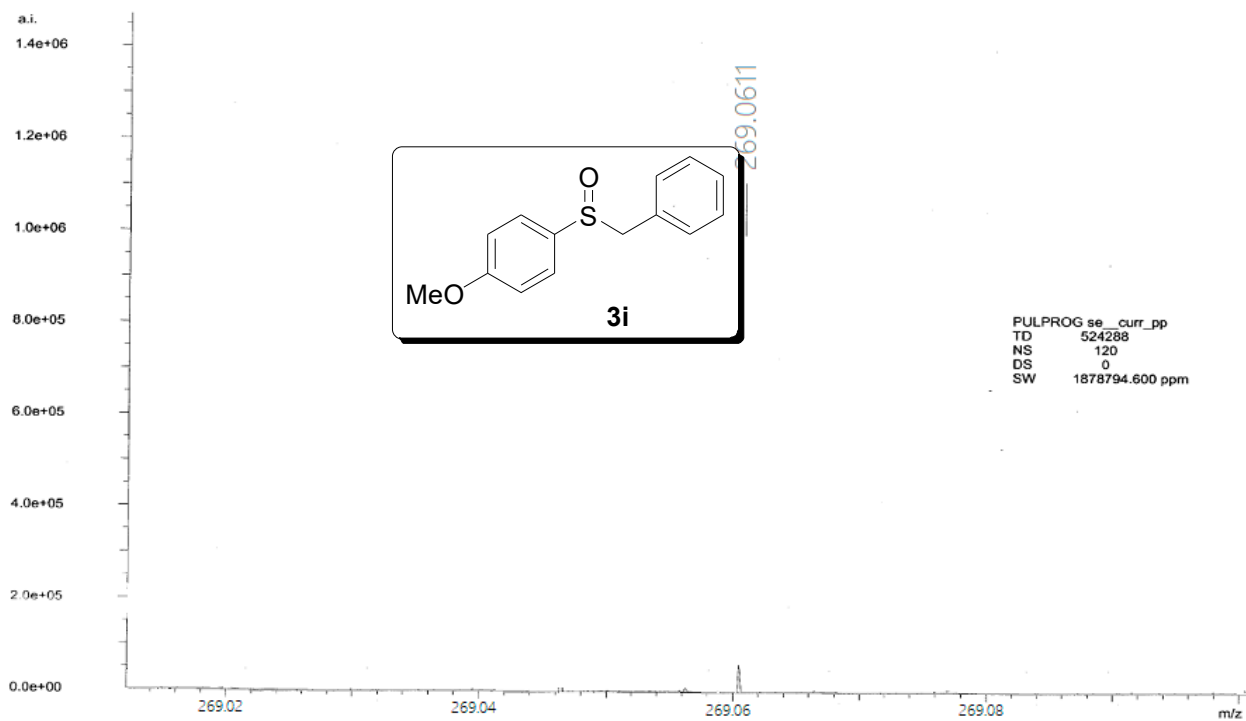Figure S27. ESI-HRMS **3i**

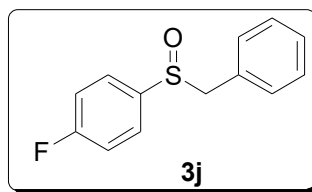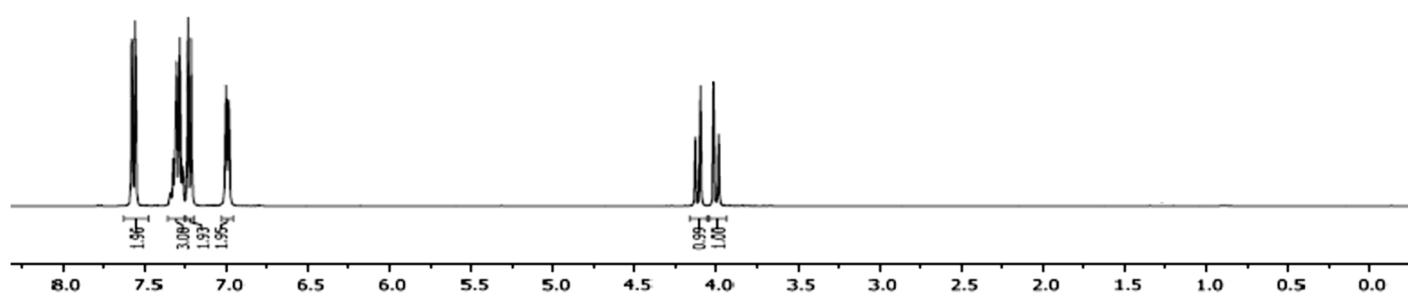Figure S28.  $^1\text{H}$ -NMR **3j**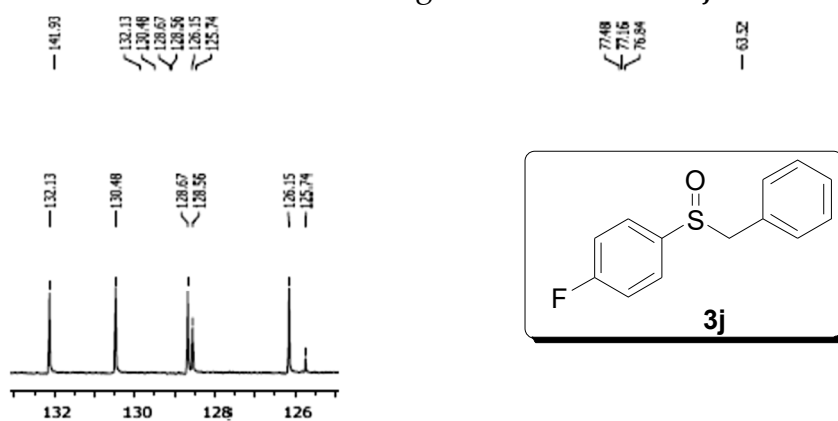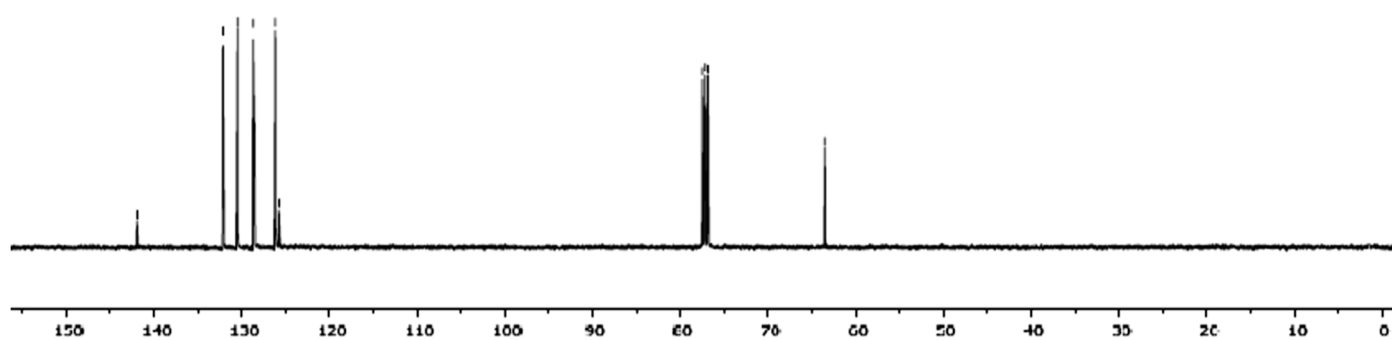Figure S29.  $^{13}\text{C}$ -NMR **3j**

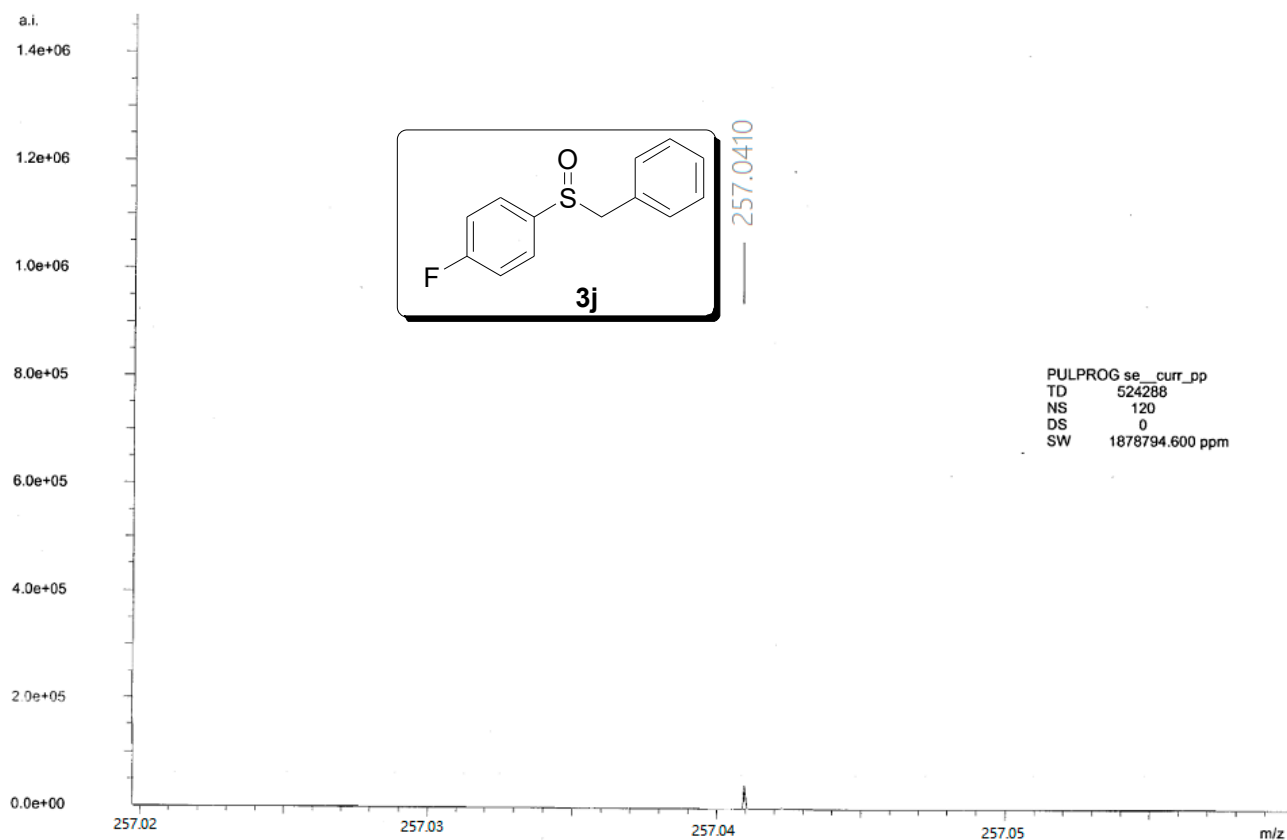Figure S30. ESI-HRMS **3j**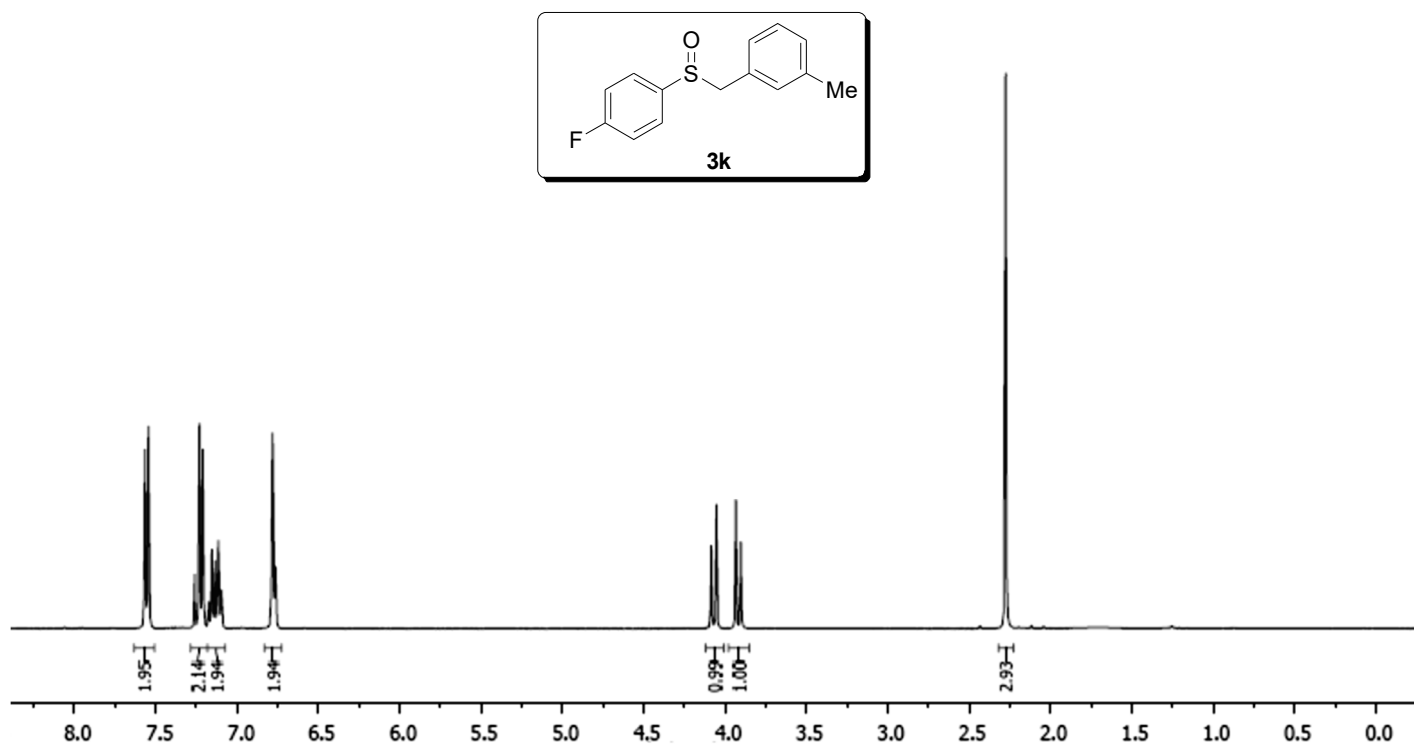Figure S31. <sup>1</sup>H-NMR **3k**

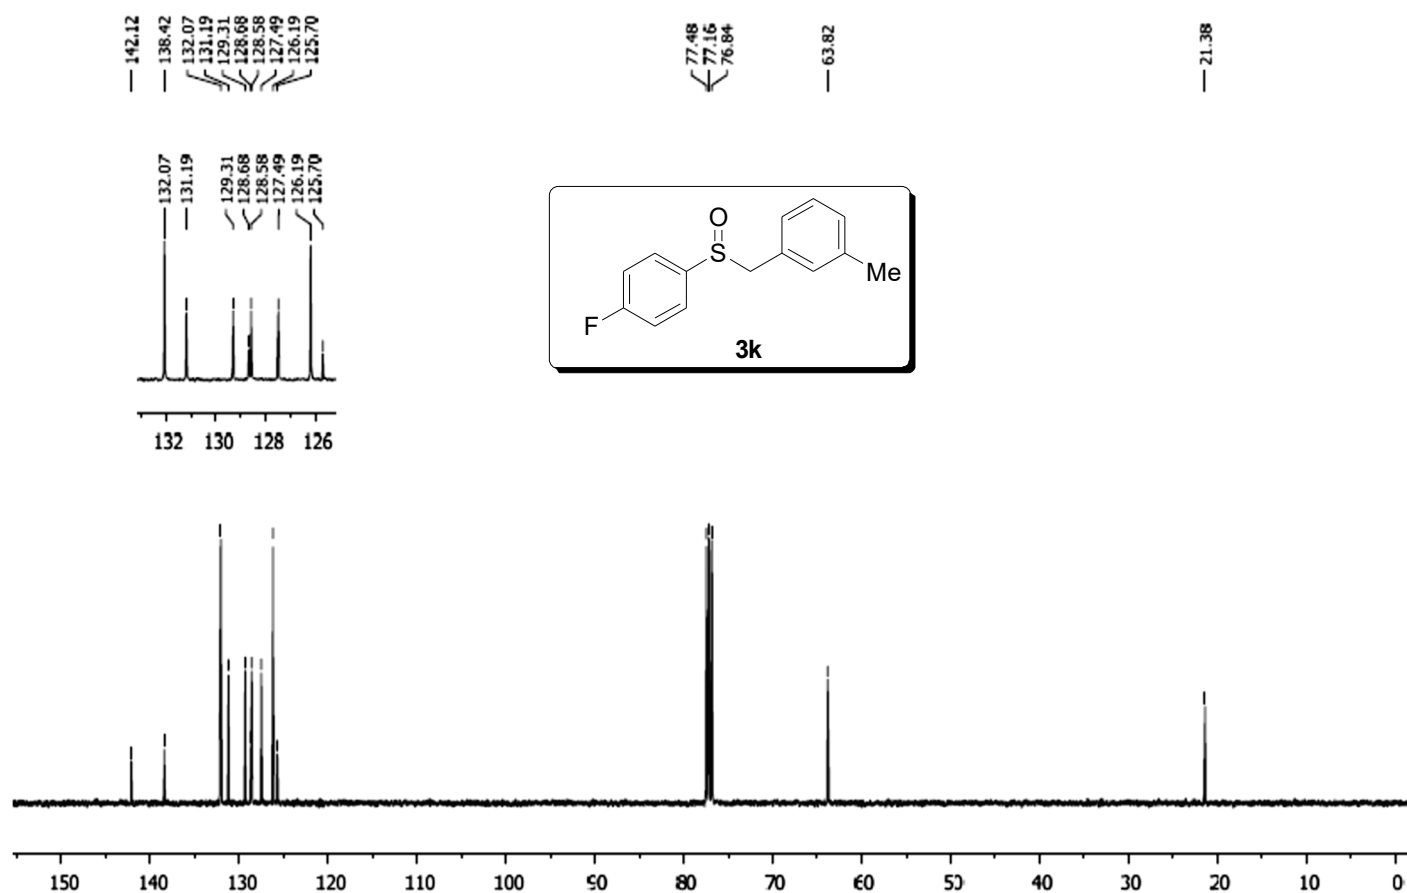Figure S32. <sup>13</sup>C-NMR **3k**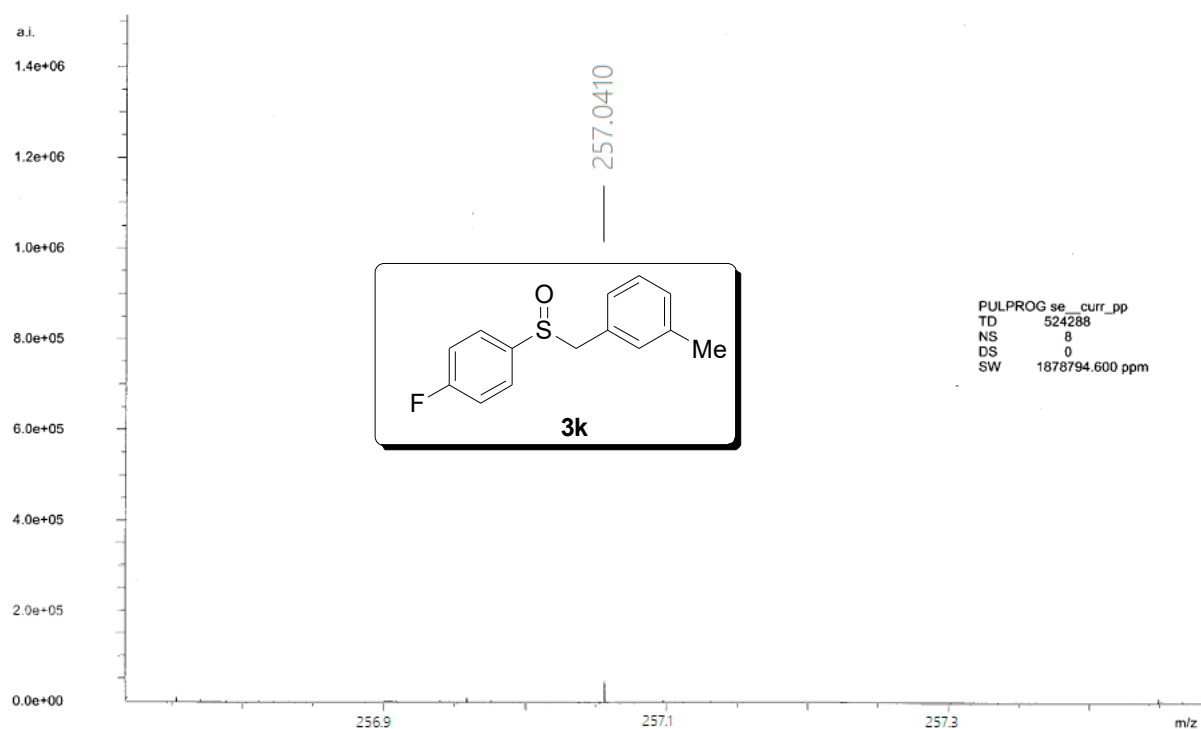Figure S33. ESI-HRMS **3k**

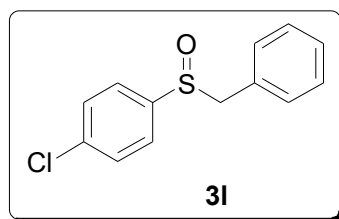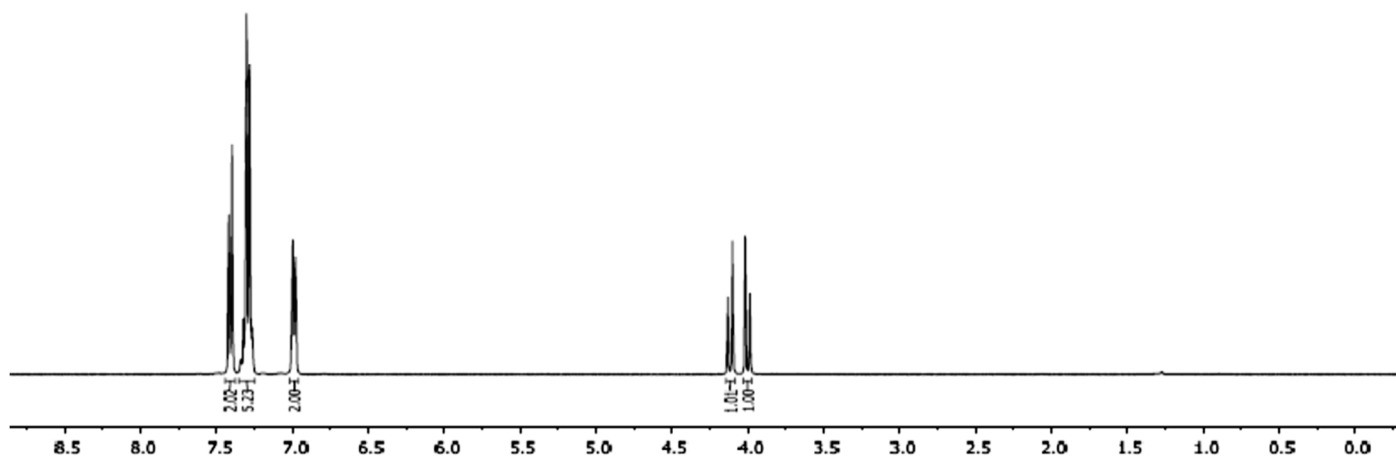Figure S34.  $^1\text{H}$ -NMR **31**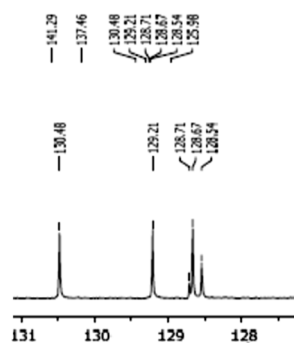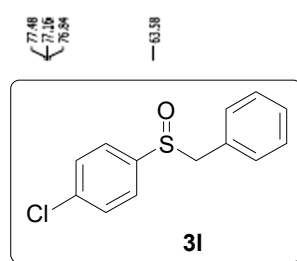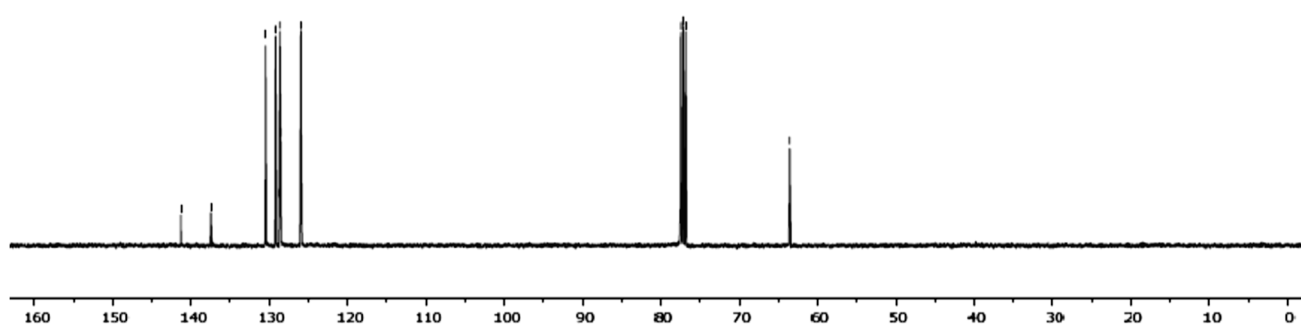Figure S35.  $^{13}\text{C}$ -NMR **31**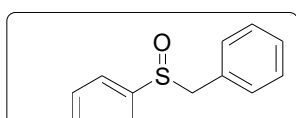

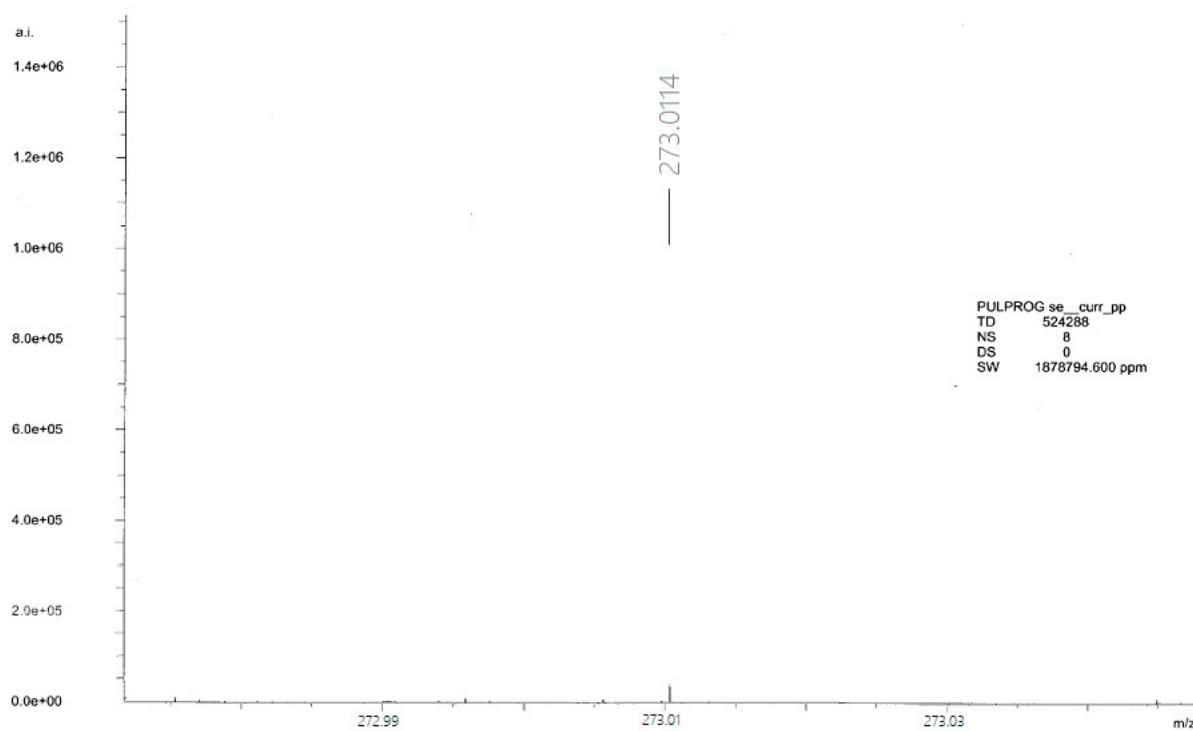Figure S36. ESI-HRMS **3l**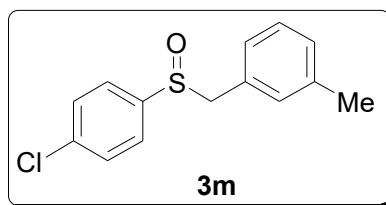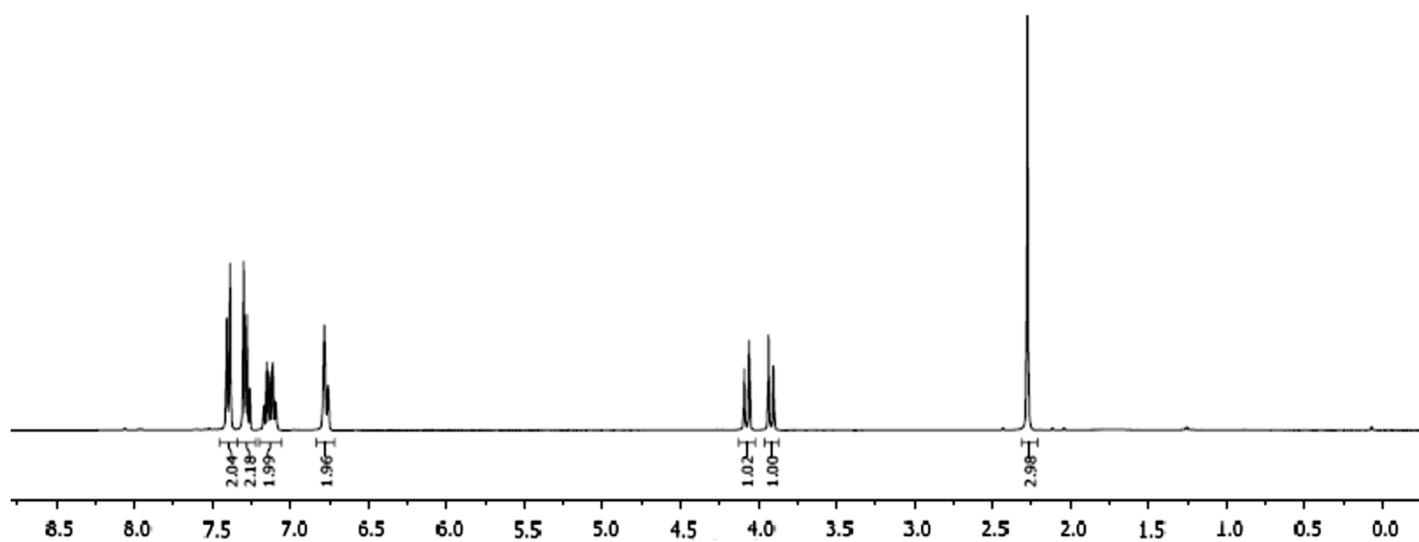Figure S37.  $^1\text{H}$ -NMR **3m**

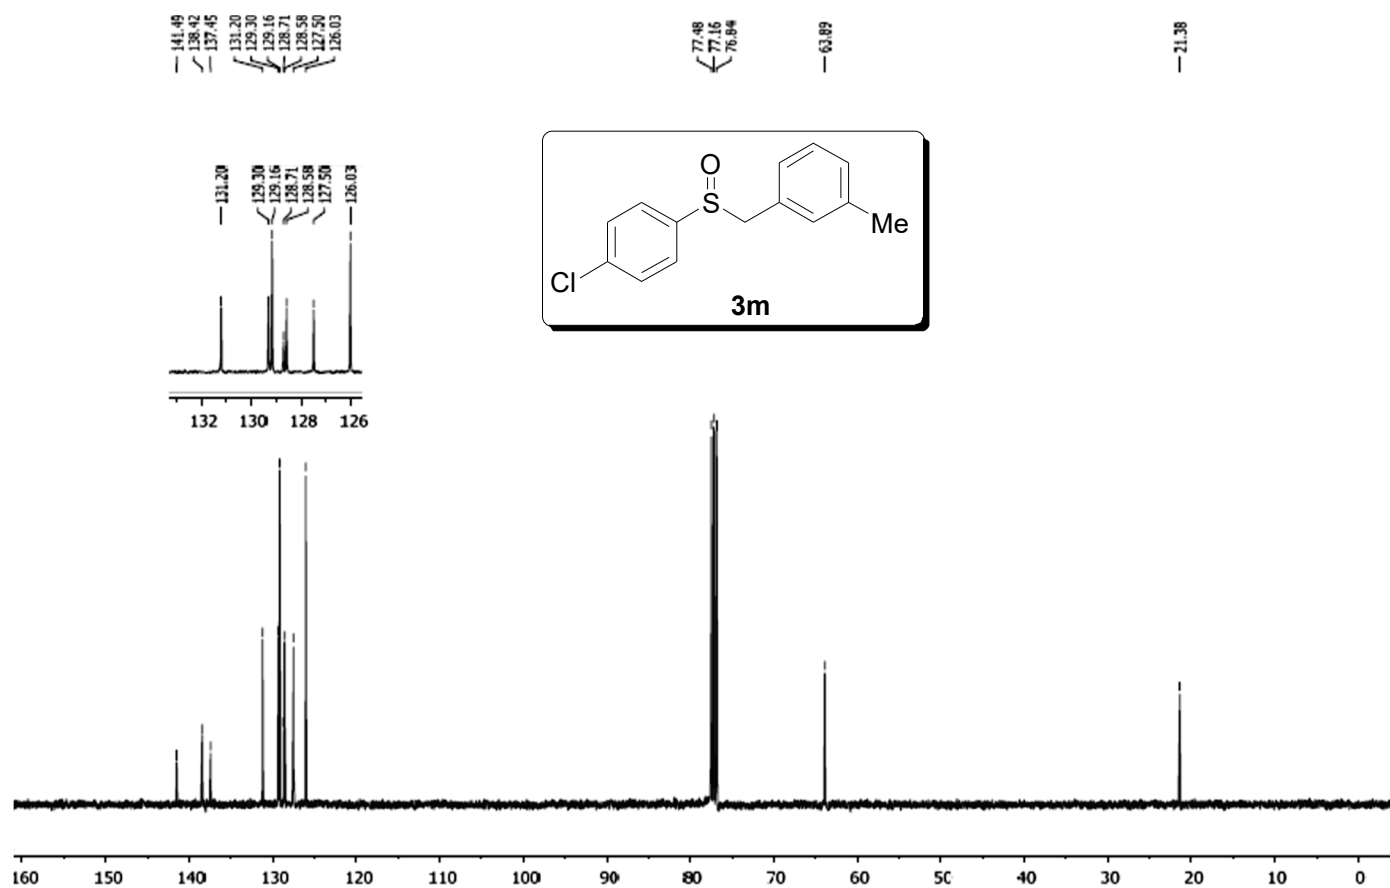Figure S38. <sup>13</sup>C-NMR **3m**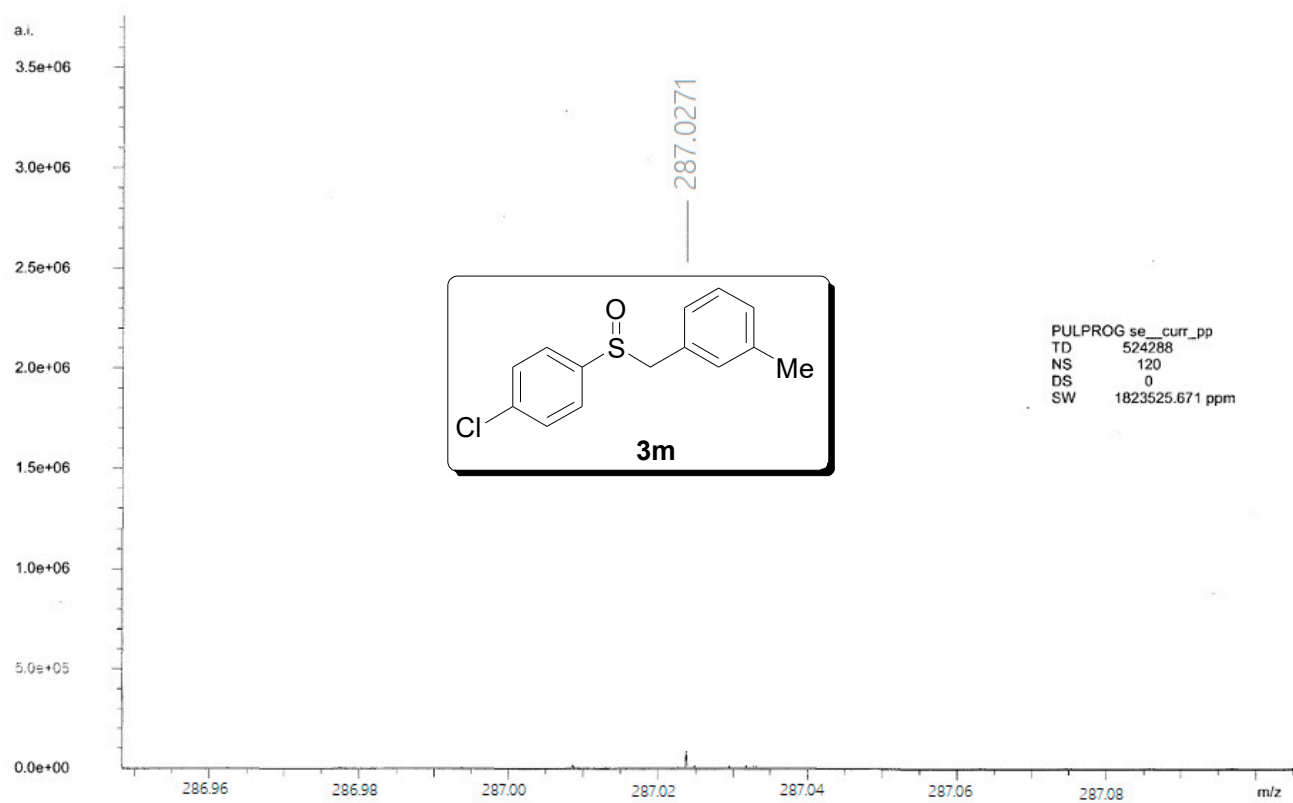Figure S39. ESI-HRMS **3m**

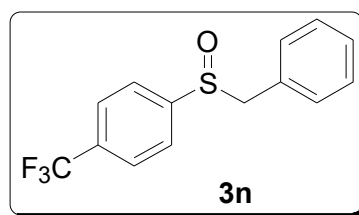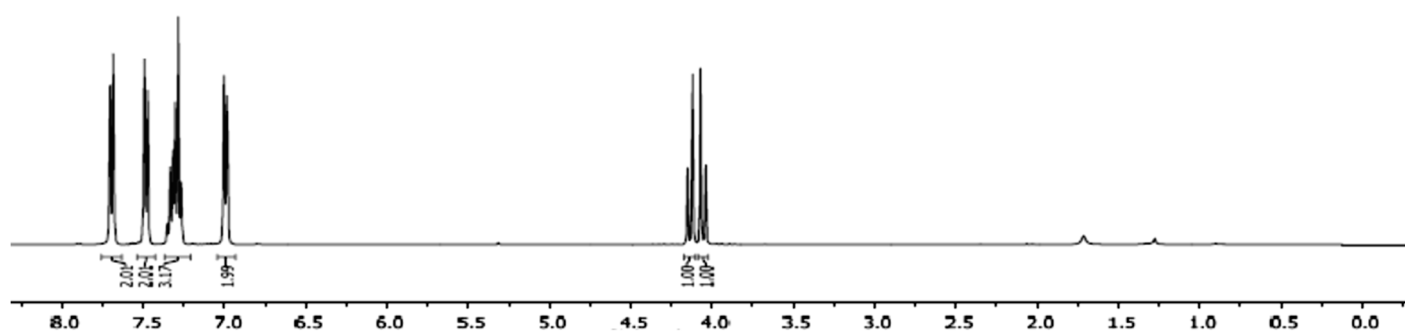Figure S40.  $^1\text{H}$ -NMR **3n**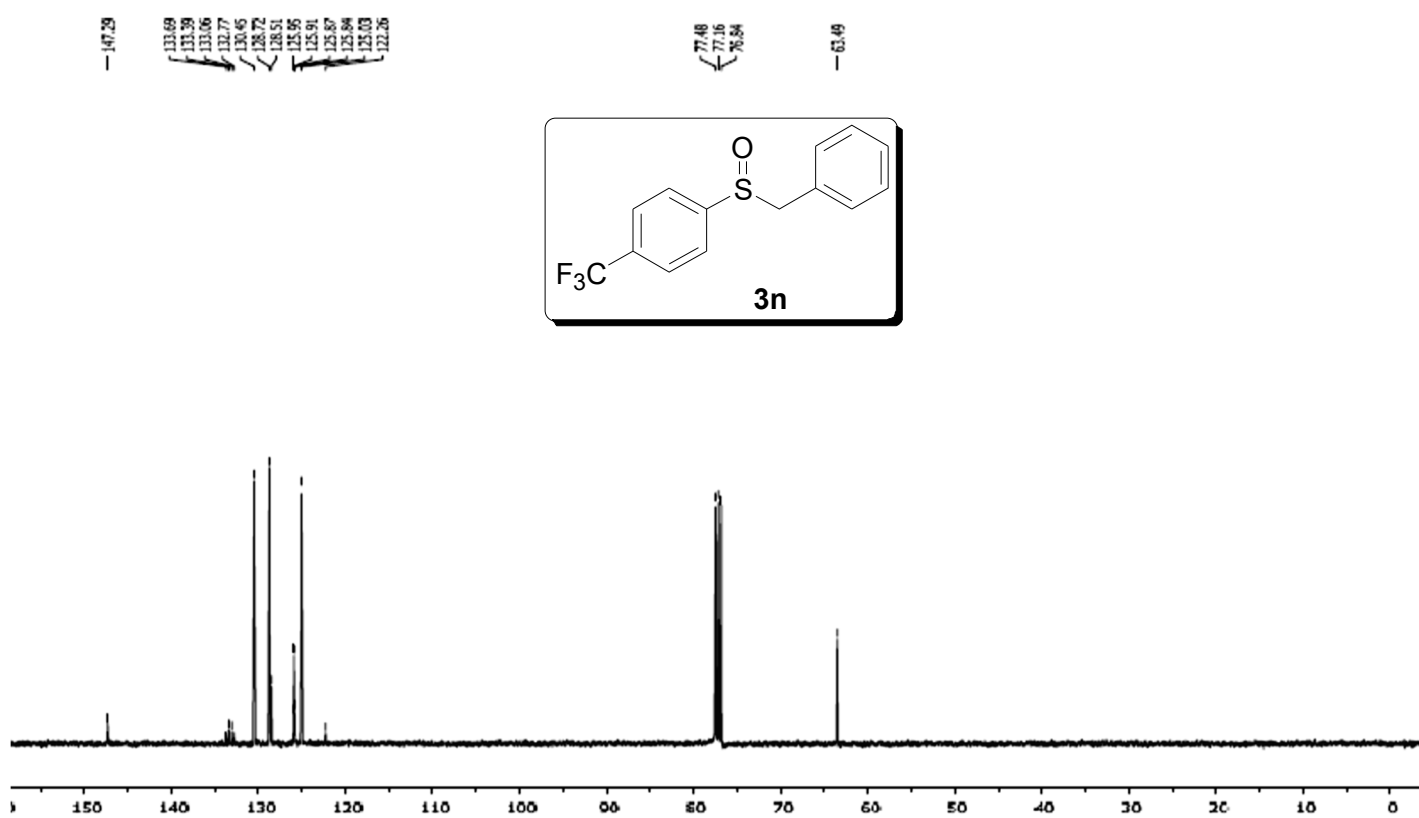Figure S41.  $^{13}\text{C}$ -NMR **3n**



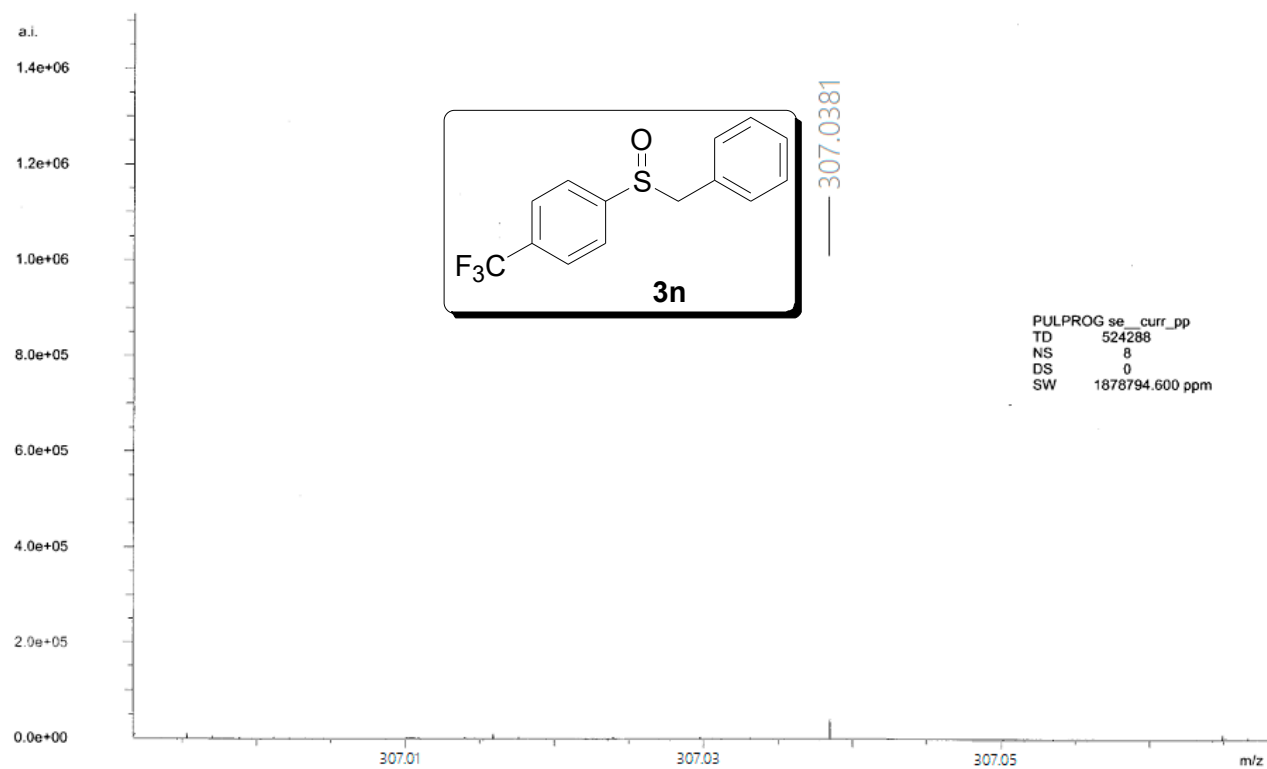Figure S42. ESI-HRMS **3n**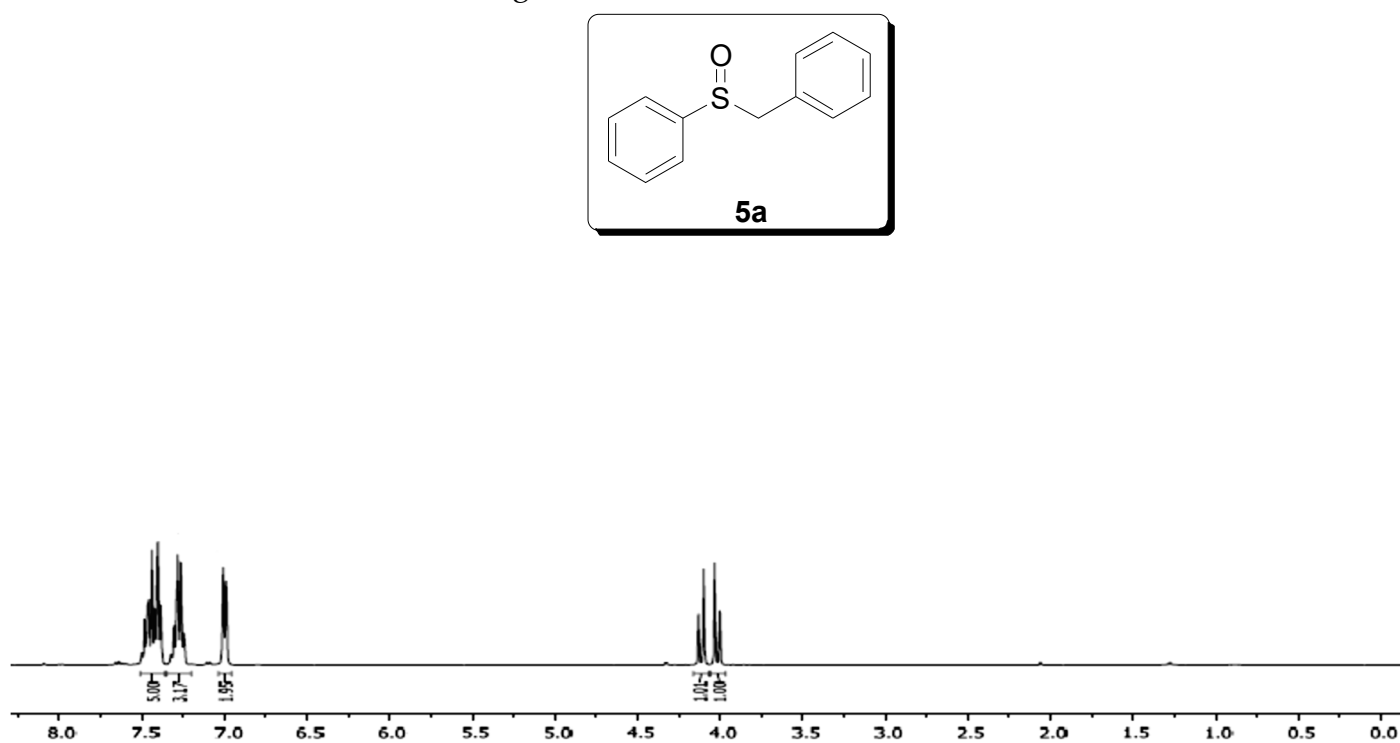Figure S43.  $^1\text{H}$ -NMR **5a**

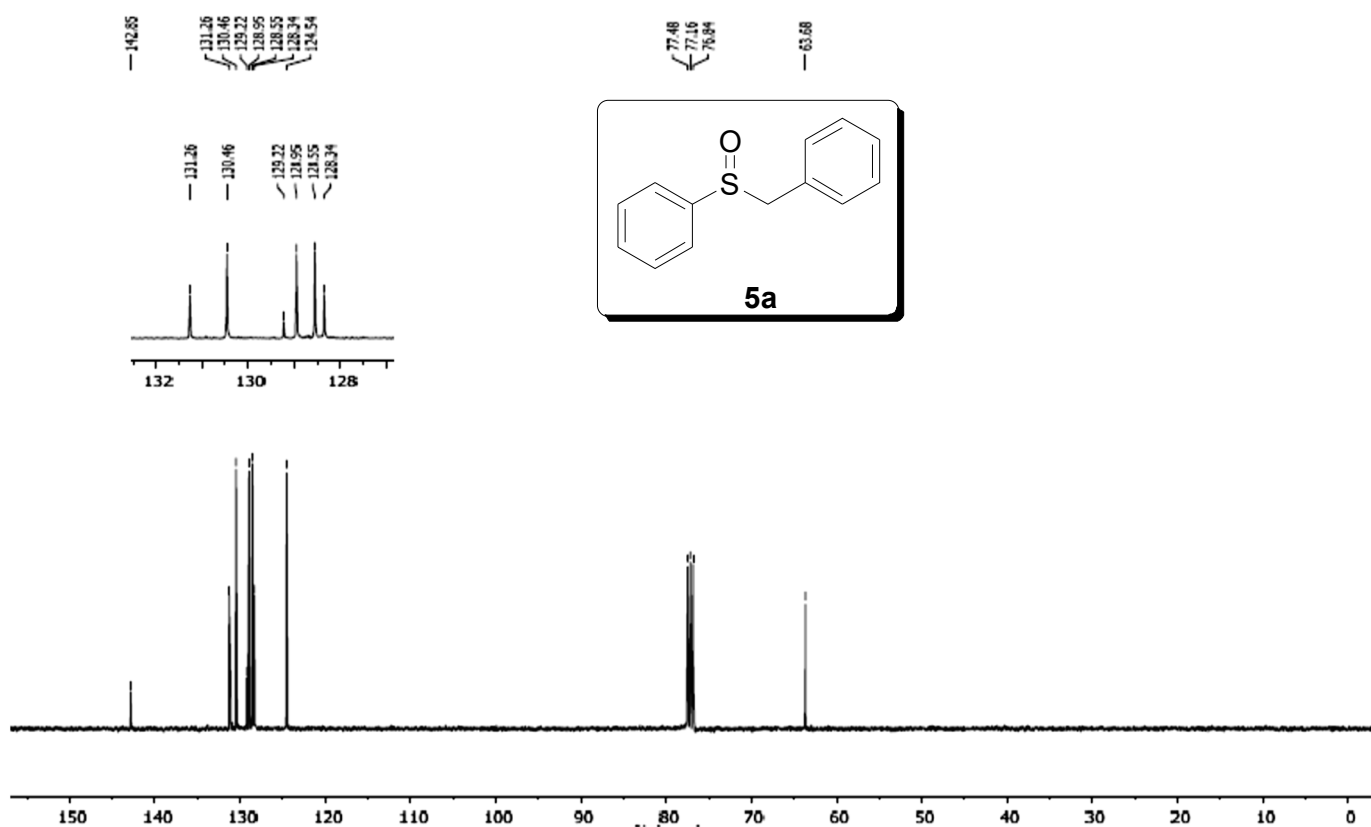Figure S44.  $^{13}\text{C}$ -NMR **5a**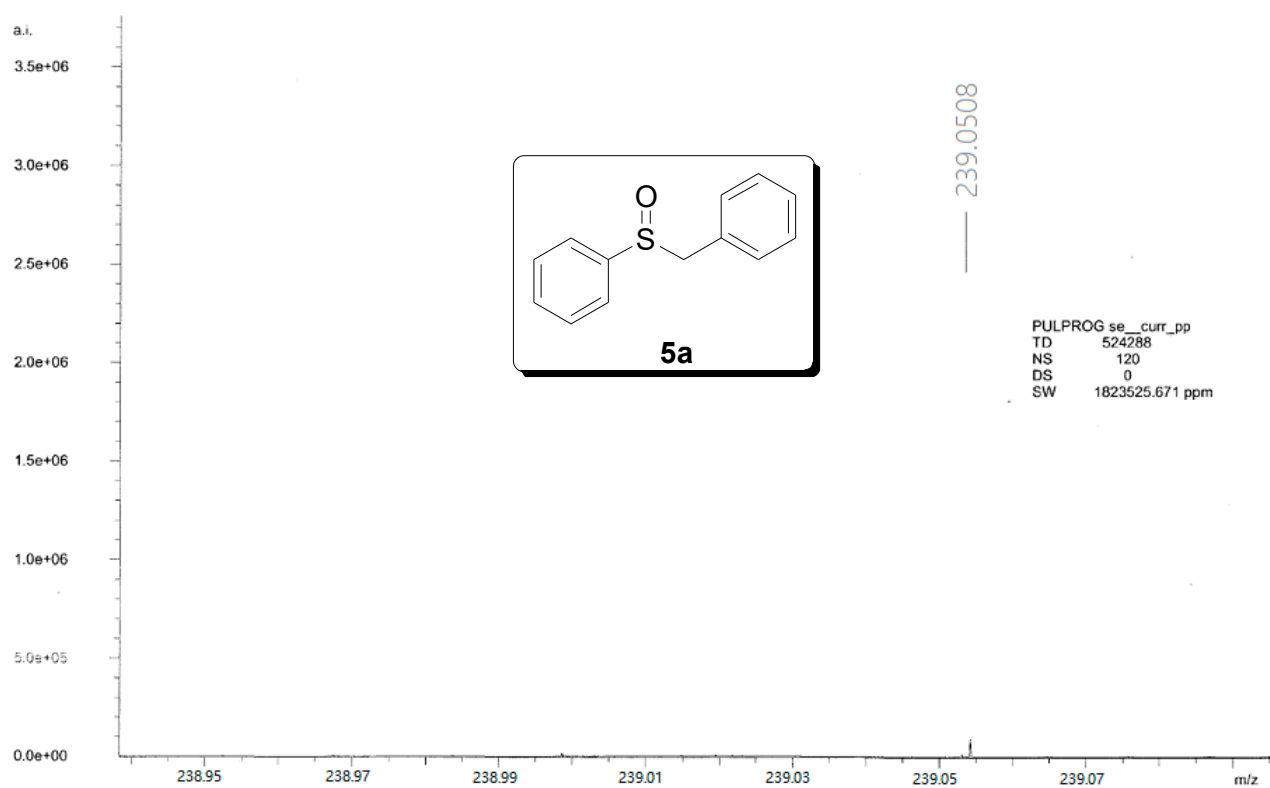Figure S45. ESI-HRMS **5a**

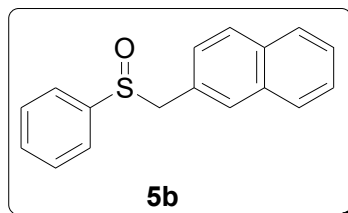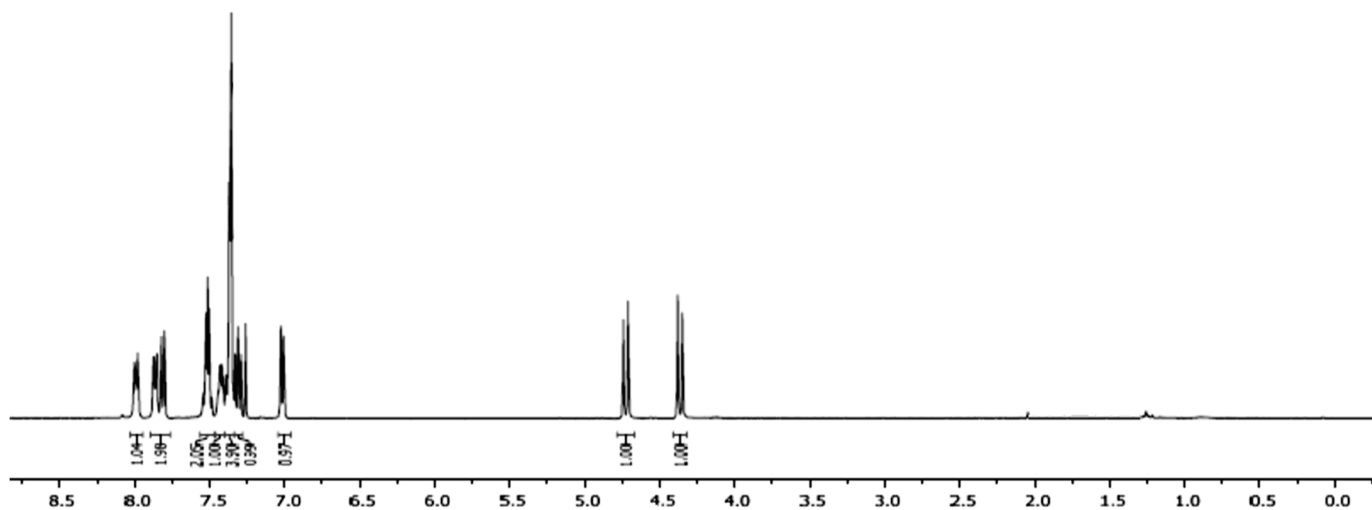Figure S46.  $^1\text{H}$ -NMR **5b**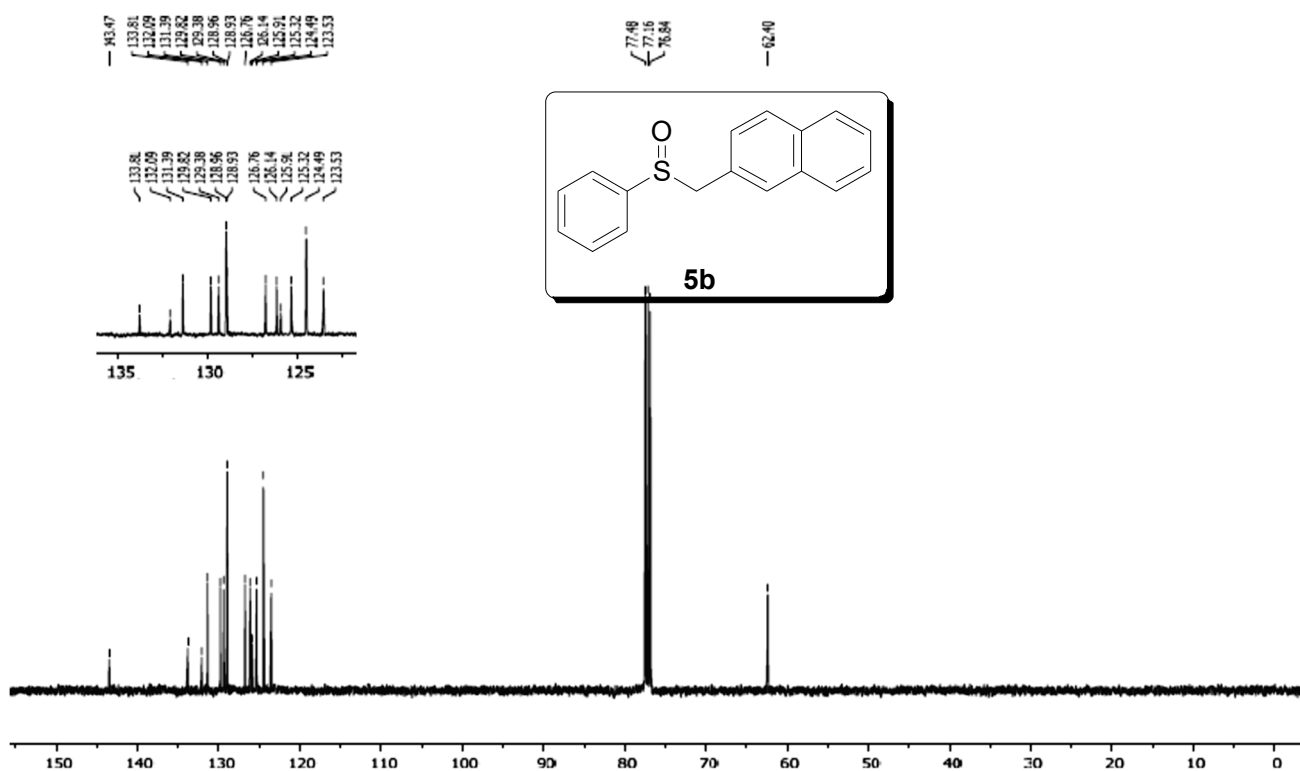Figure S47.  $^{13}\text{C}$ -NMR **5b**

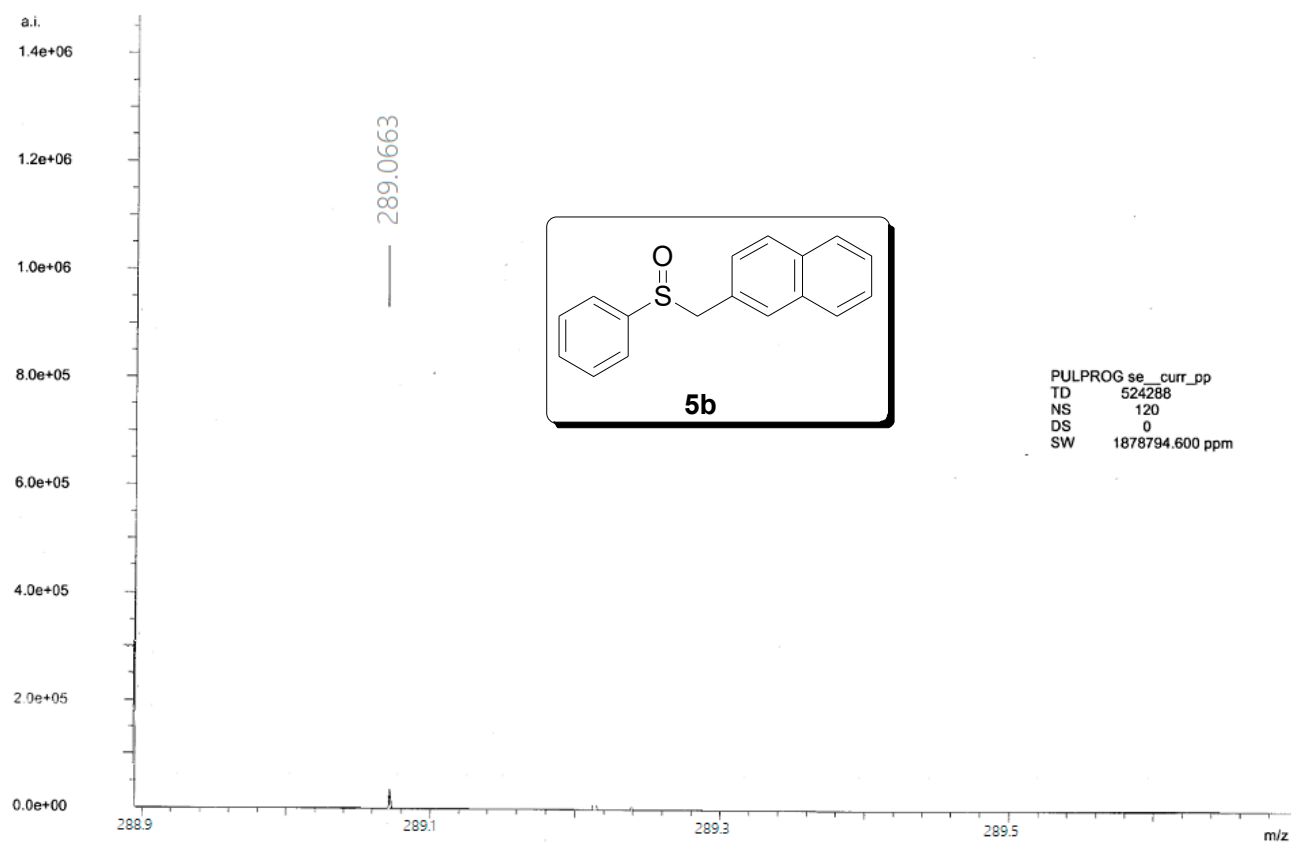Figure S48. ESI-HRMS **5b**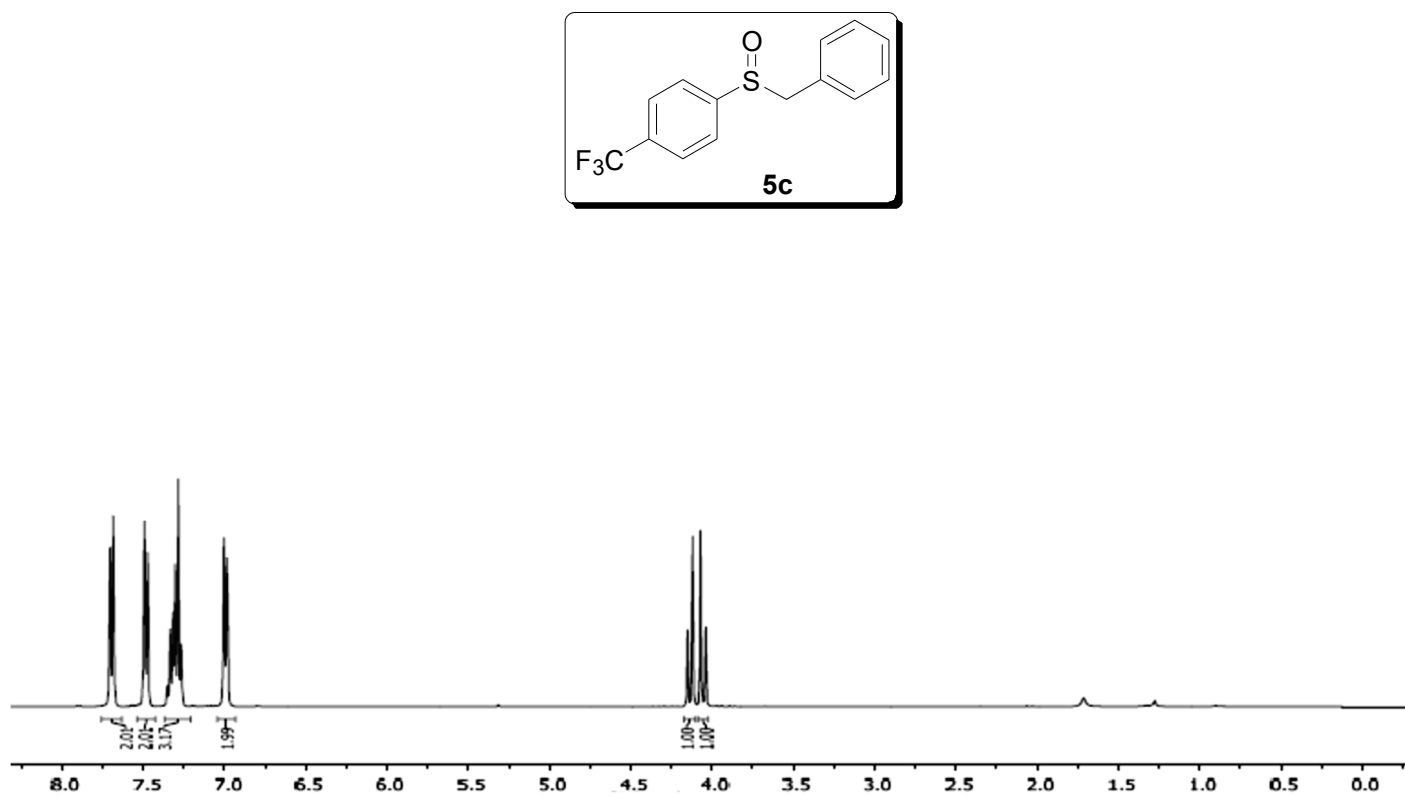Figure S49.  $^1\text{H}$ -NMR **5c**

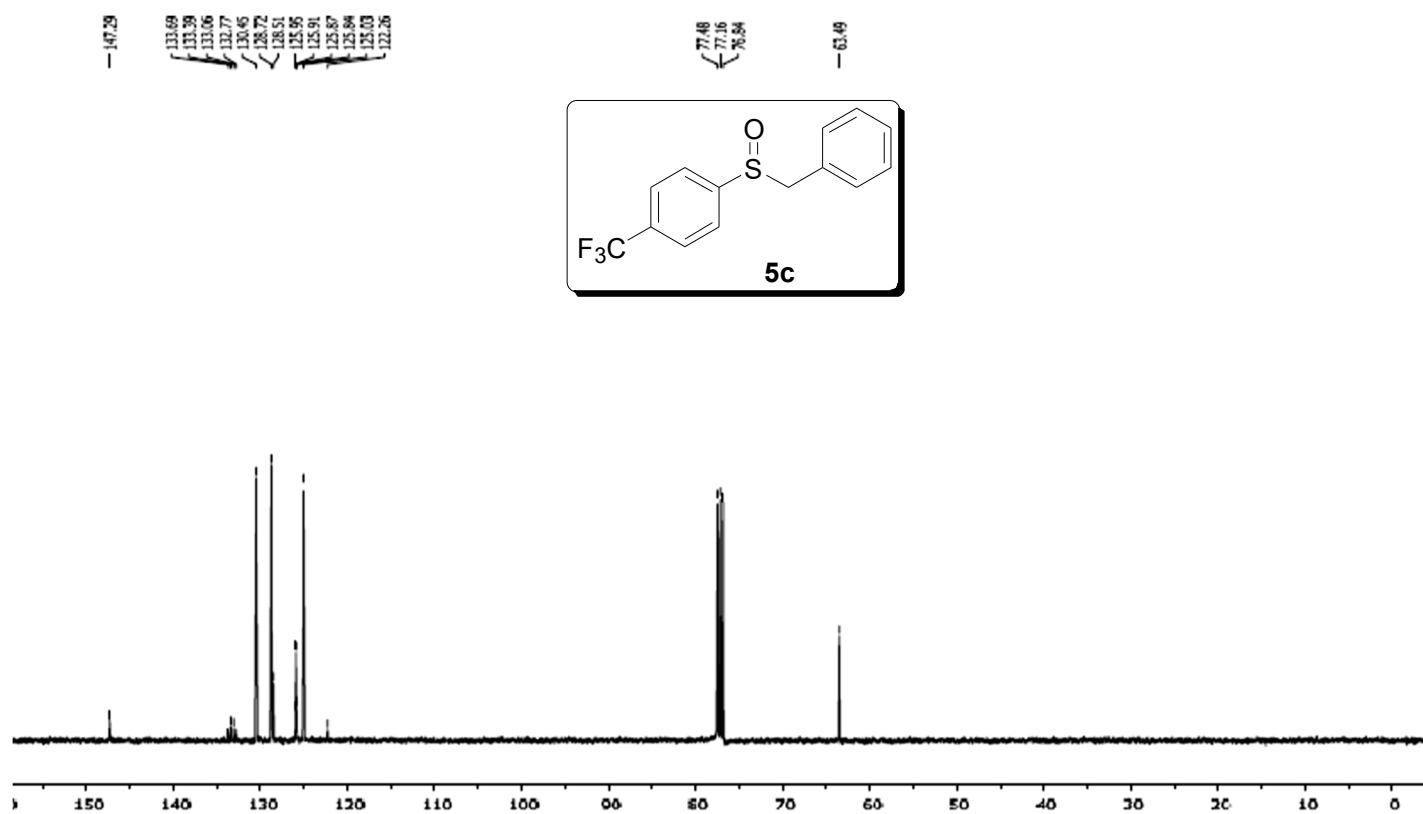Figure S50.  $^{13}\text{C}$ -NMR **5c**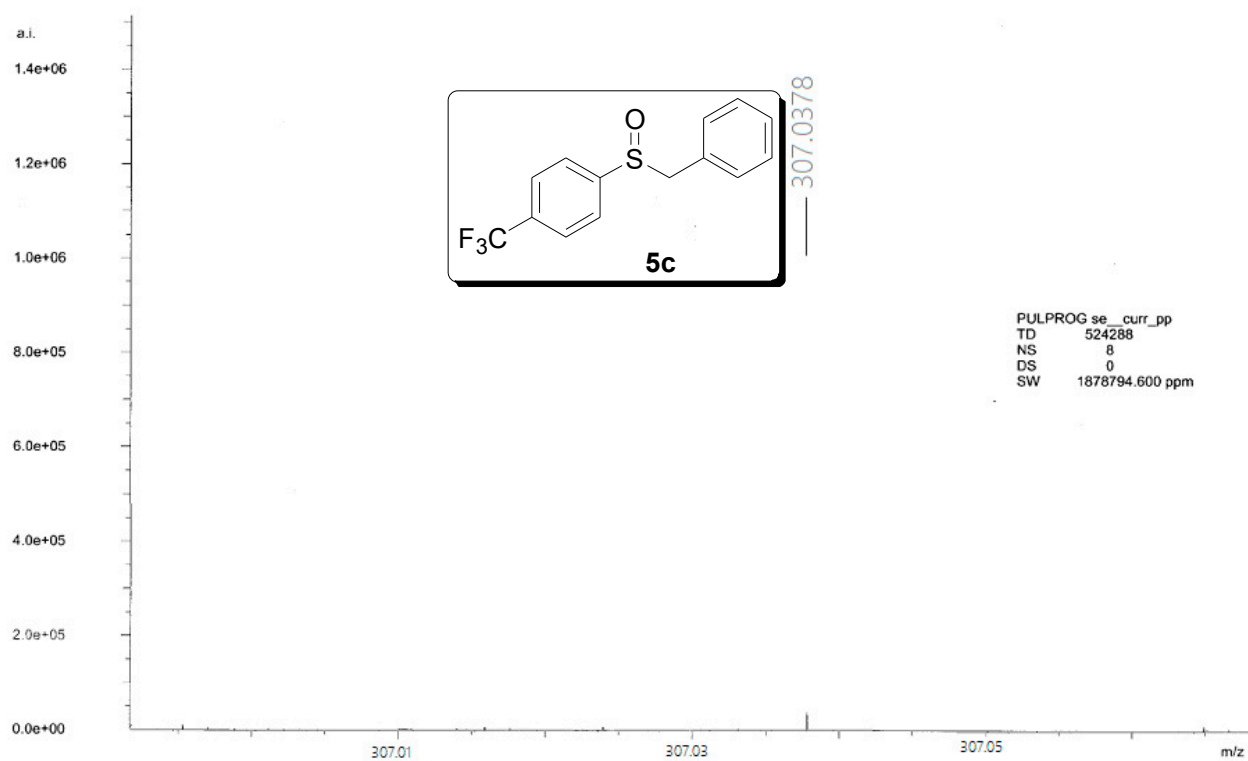Figure S51. ESI-HRMS **5c**

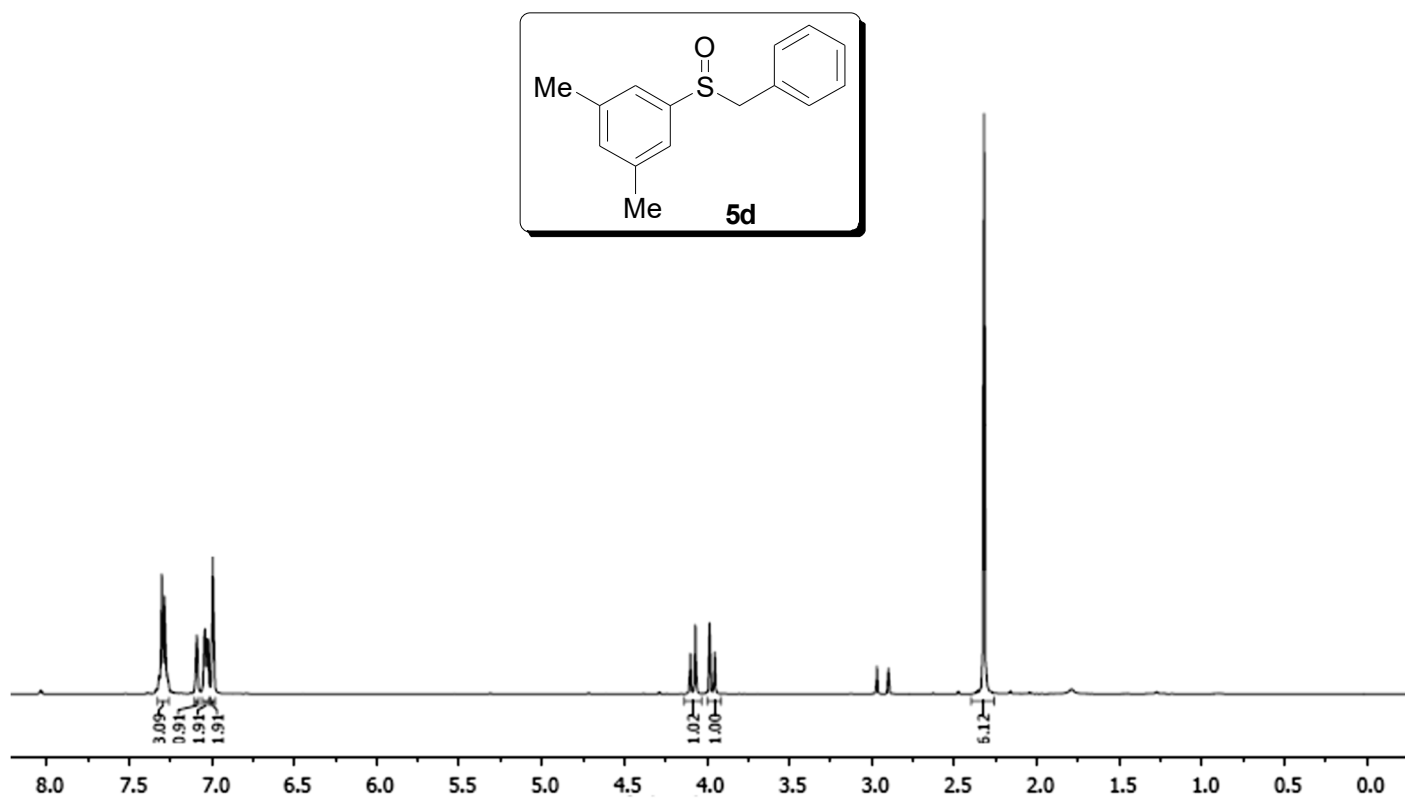Figure S52. <sup>1</sup>H-NMR 5d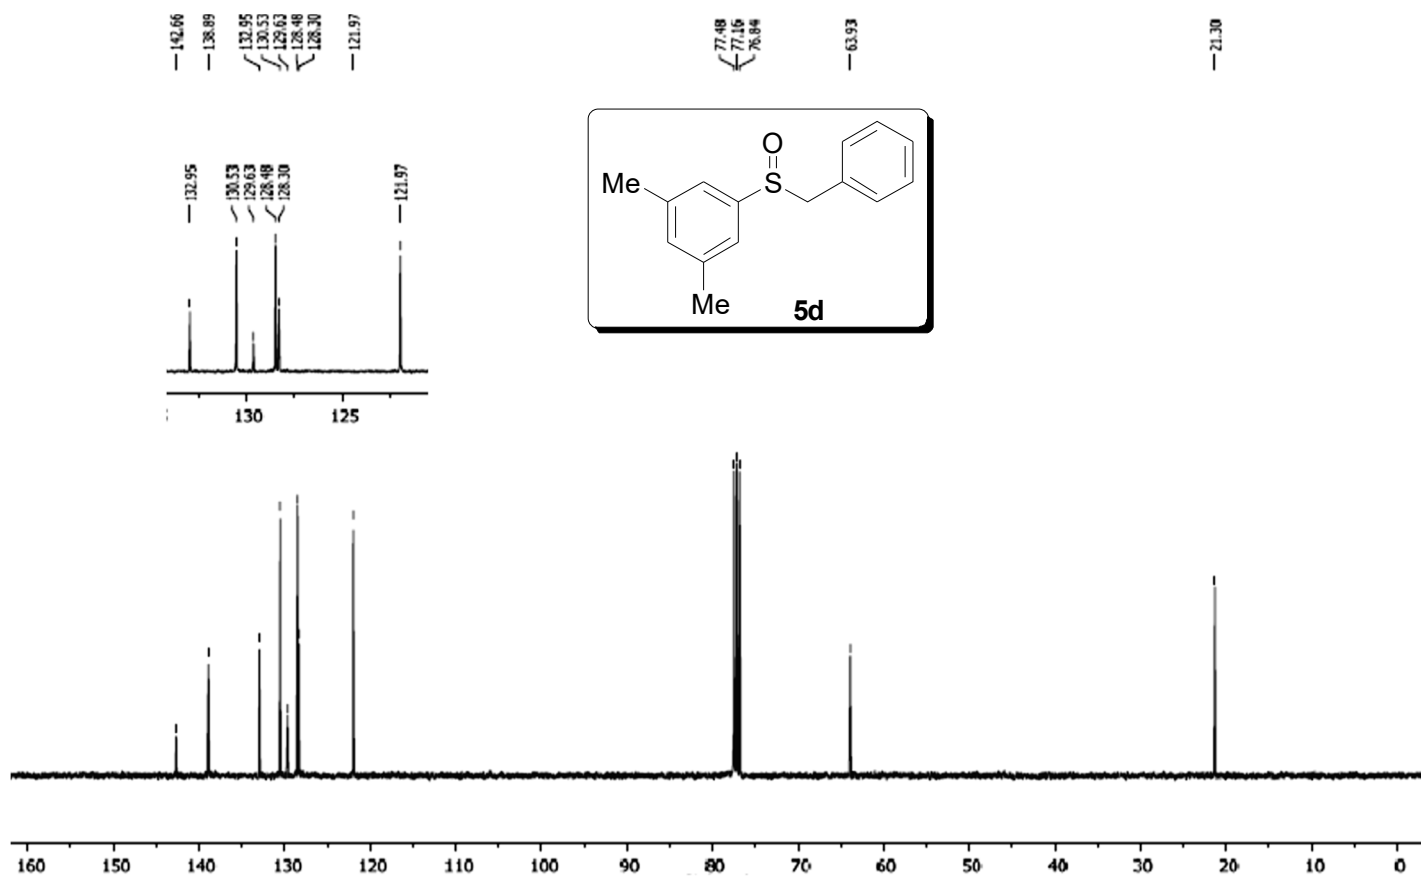Figure S53. <sup>13</sup>C-NMR 5d

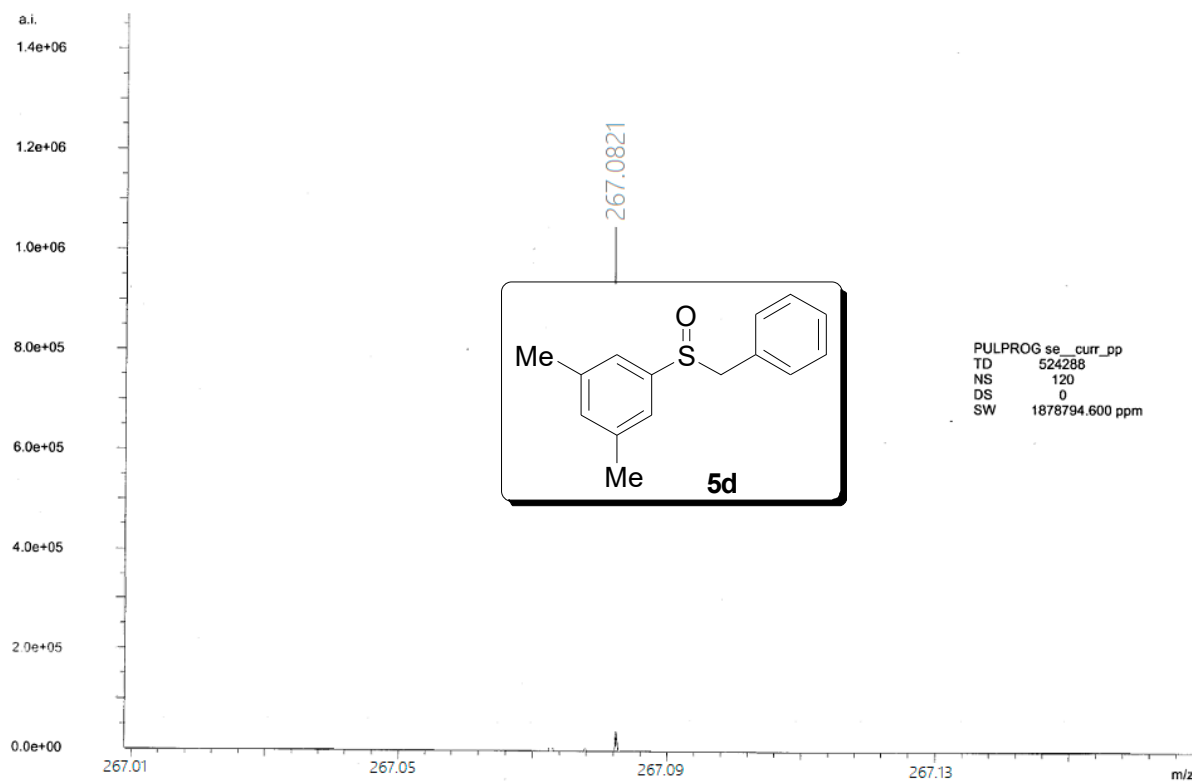

Figure S54. ESI-HRMS 5d

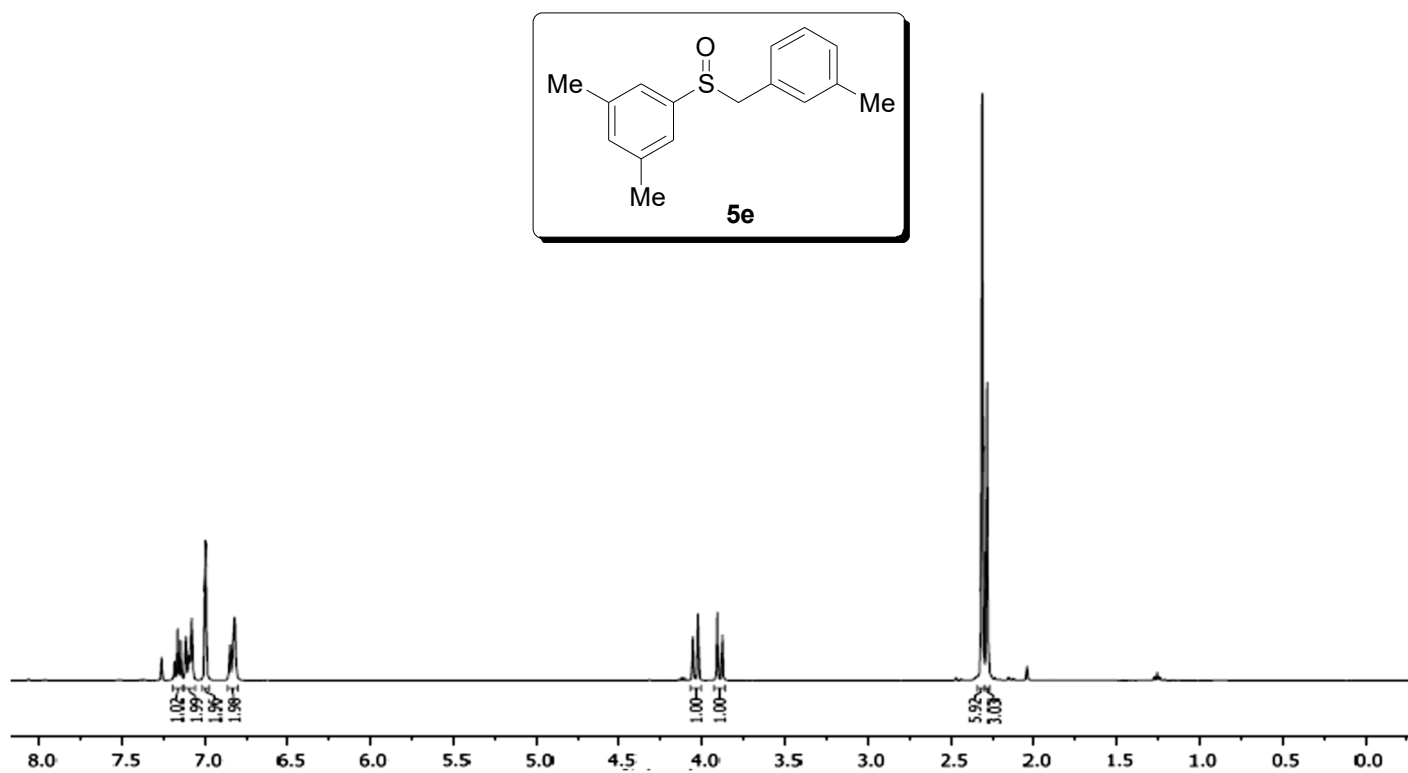Figure S55.  $^1\text{H}$ -NMR 5e

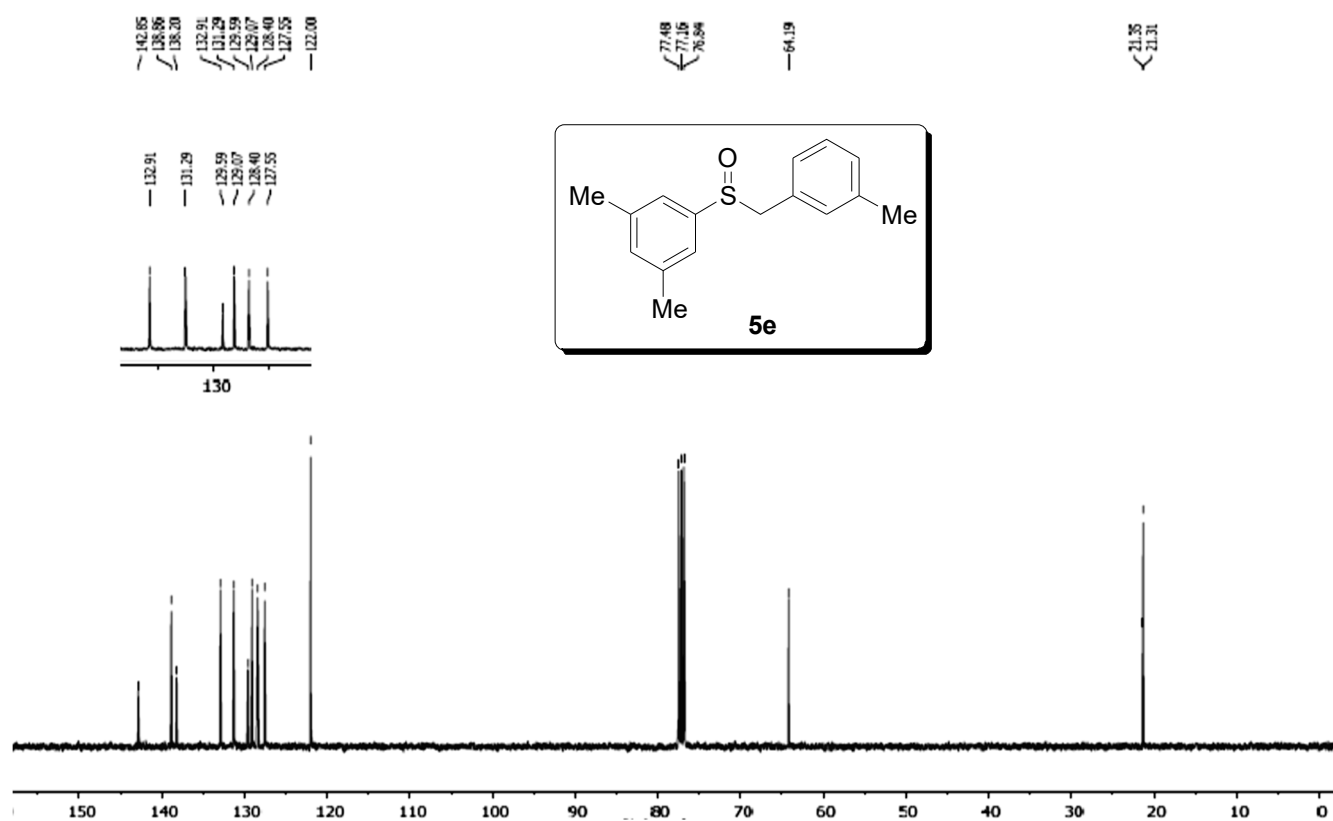Figure S56. <sup>13</sup>C-NMR 5e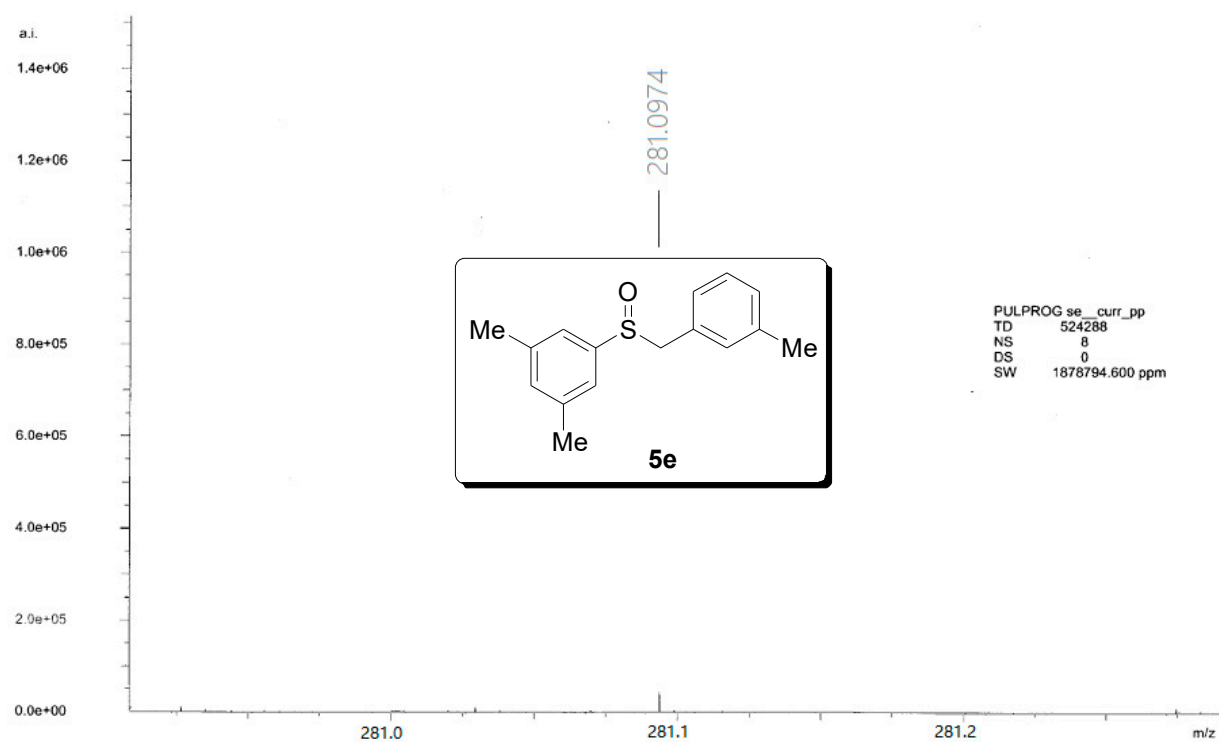

Figure S57. ESI-HRMS 5e



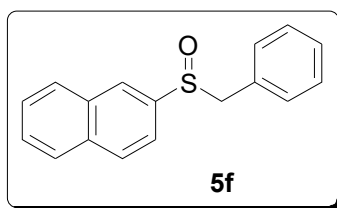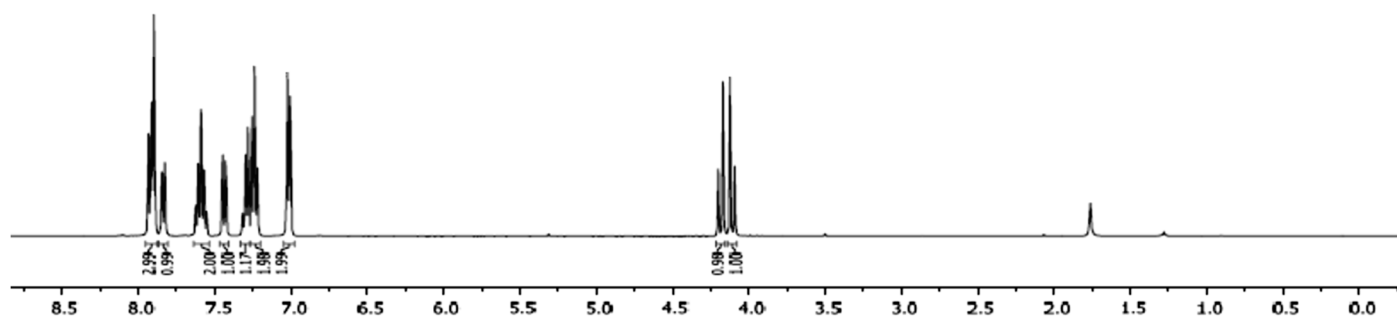Figure S58. <sup>1</sup>H-NMR **5f**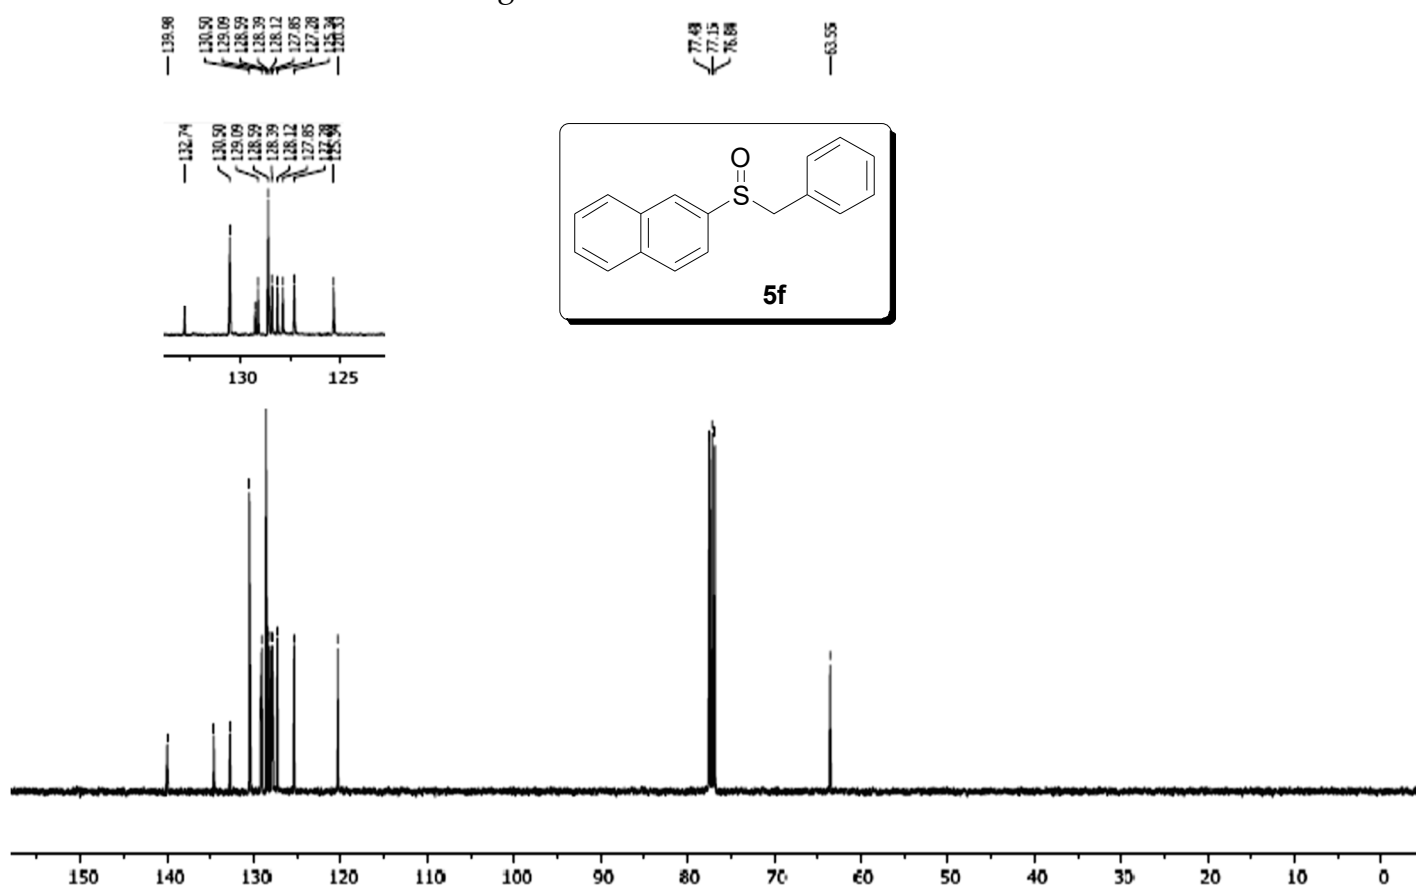Figure S59. <sup>13</sup>C-NMR **5f**

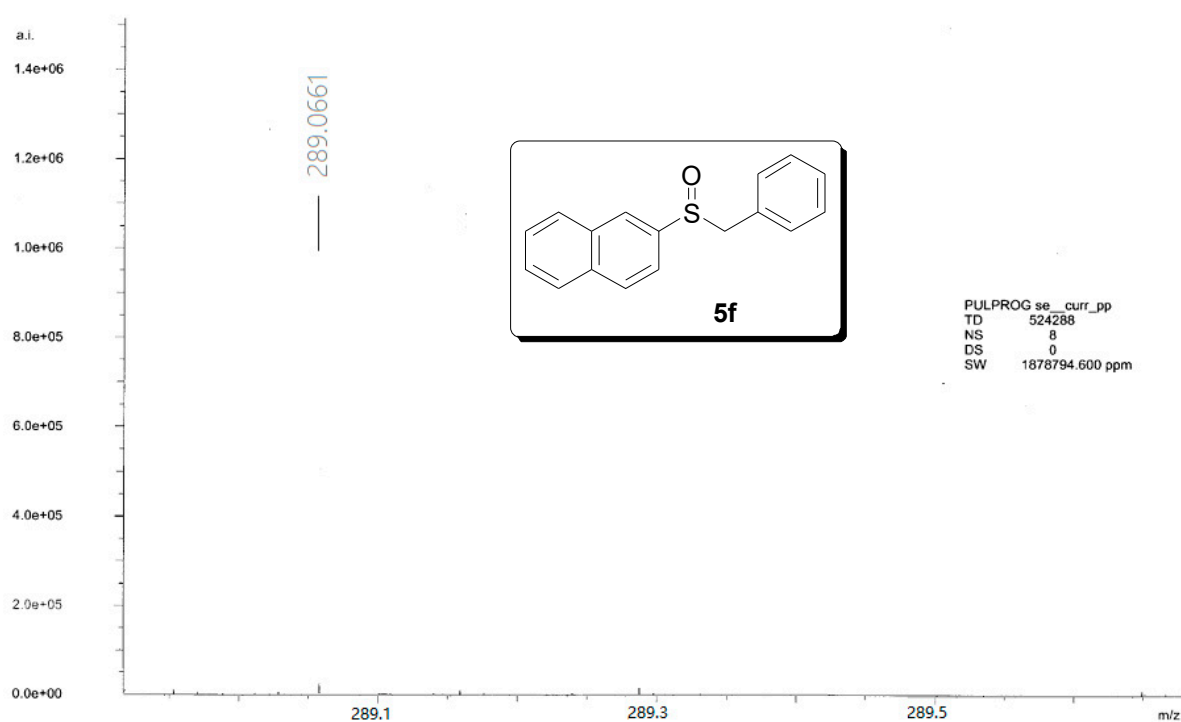Figure60. ESI-HRMS **5f**
